# Supplementary material
Source: publisher figshare collection journal article supplement (https://acs.figshare.com/ndownloader/files/16531295)
Supplement: Supplementary file 1 [file 16531295]

## Supporting Information for:

# Perylene Bisimide Dyes with Up to Five Independently Introduced Substituents: Controlling the Functionalization Pattern and Photo-physical Properties Using Regiospecific Bay-Substitution

*Rajeev K. Dubey,<sup>†#\*</sup> Stephen J. Eustace,<sup>‡</sup> Jesse S. van Mullem,<sup>†</sup> Ernst J. R. Sudhölter,<sup>†</sup> Ferdinand C. Grozema,<sup>†</sup> and Wolter F. Jager<sup>†\*</sup>*

<sup>†</sup>Department of Chemical Engineering and <sup>‡</sup>Department of Biotechnology, Delft University of Technology, Van der Maasweg 9, 2629 HZ Delft, The Netherlands.

The supporting information contains following items:

| S. No. | Section                                        | Page No. |
|--------|------------------------------------------------|----------|
| 1.     | Cyclic voltammograms                           | SI-2     |
| 2.     | Spectroscopy related data                      | SI-3     |
| 3.     | Structure elucidation by NMR spectroscopy      | SI-4–47  |
| 4.     | <sup>1</sup> H and <sup>13</sup> C NMR spectra | SI-48–62 |
| 5.     | Mass spectra of newly synthesized compounds    | SI-63–69 |

## Section 1. Cyclic voltammograms

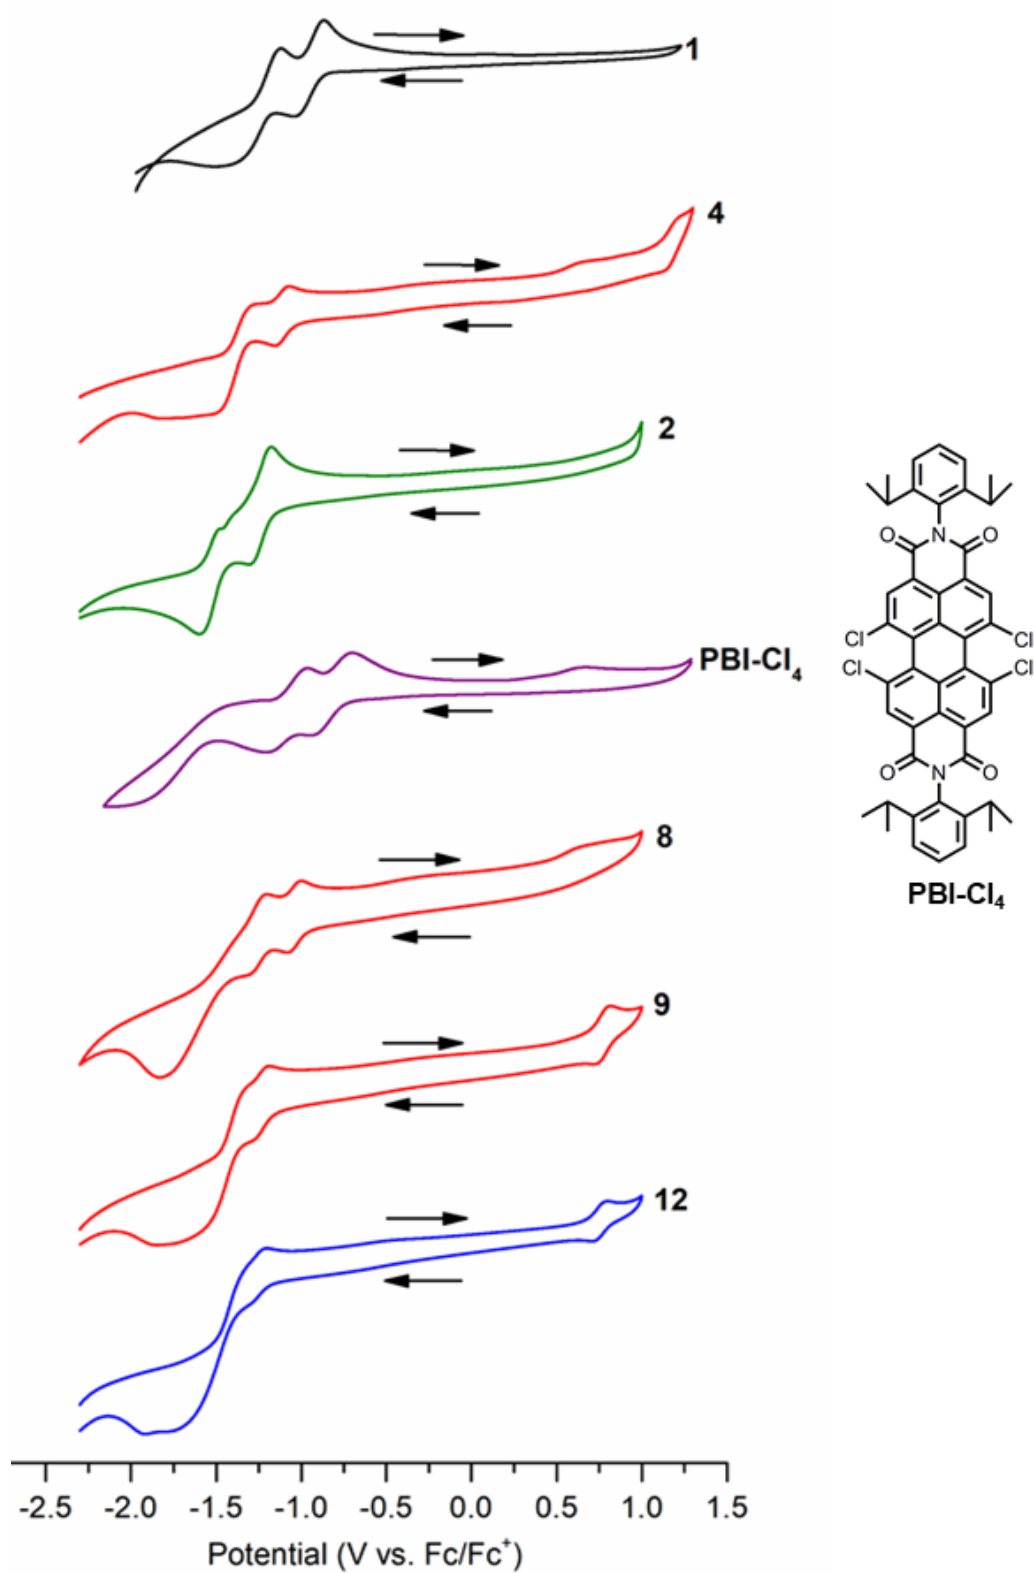

Figure S-1.1: Cyclic voltammograms of compounds 1, 4, 2, PBI-Cl<sub>4</sub>, 8, 9, and 12.

## Section 2. Spectroscopy related data

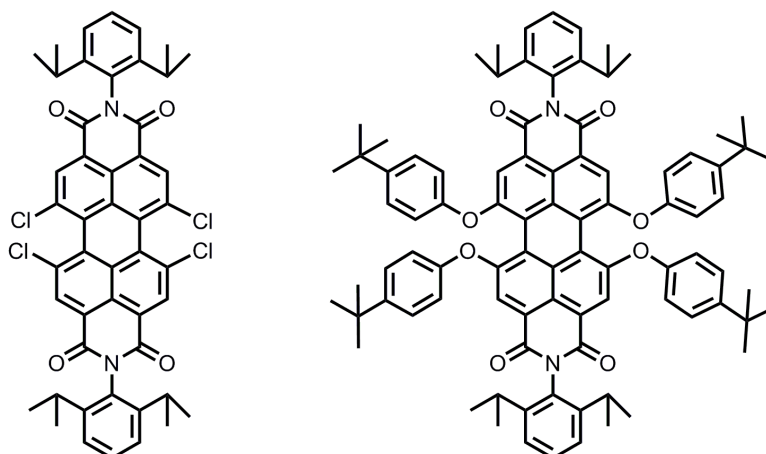

**Figure S-2.1:** Structures of compound **PBI-Cl<sub>4</sub>** (left) and **PBI-(OPh)<sub>4</sub>** (right).

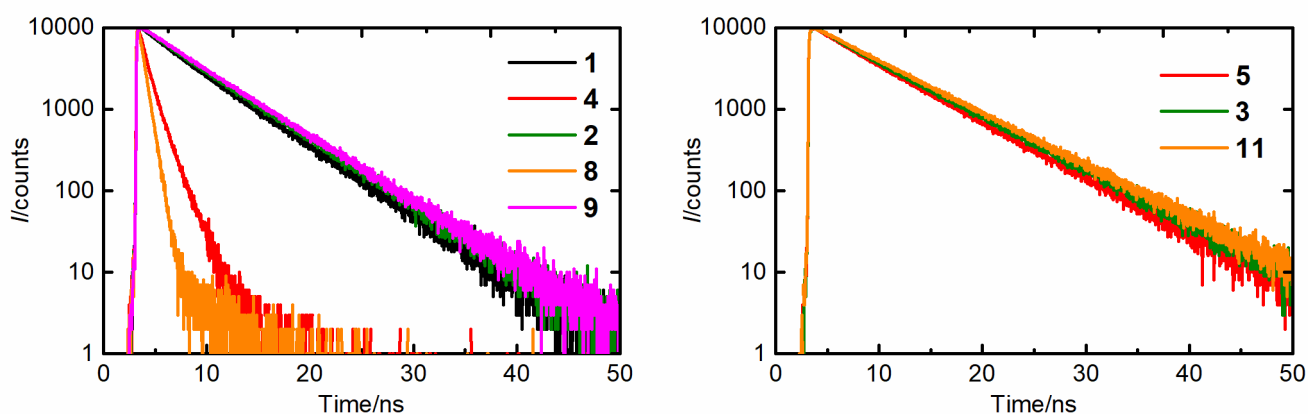

**Figure S-2.2:** Fluorescence decay-curves of compounds **1**, **4**, **2**, **8**, **9** and relevant model compounds (**5**, **3**, and **11**) in toluene after excitation at 400 nm.

**Table S-1:** Optical properties of the model compounds **5**, **3**, **PBI-Cl<sub>4</sub>**, **11**, and **PBI-(OPh)<sub>4</sub>** in toluene.

| Compound                     | $\lambda_{\text{abs}}(\text{nm})$ | $\epsilon$<br>( $\text{M}^{-1}\text{cm}^{-1}$ ) | $\lambda_{\text{em}}(\text{nm})$ | $\Phi_f^a$ | $\tau_f(\text{ns})^b$ |
|------------------------------|-----------------------------------|-------------------------------------------------|----------------------------------|------------|-----------------------|
| <b>5</b>                     | 507                               | 28700                                           | 560                              | 0.92       | 6.09                  |
| <b>3</b>                     | 529                               | 25100                                           | 589                              | 0.79       | 6.42                  |
| <b>PBI-Cl<sub>4</sub></b>    | 523                               | 45000                                           | 552                              | 0.95       | 5.11                  |
| <b>11</b>                    | 560                               | 43200                                           | 606                              | 0.72       | 6.73                  |
| <b>PBI-(OPh)<sub>4</sub></b> | 581                               | 61700                                           | 611                              | 0.76       | 5.79                  |

<sup>a</sup> Fluorescence quantum yield. <sup>b</sup> Fluorescence life-time.

## Section 3. Structure elucidation of compounds 2, 3, 4, 6, 9, 12, and 15 by 1D and 2D NMR Spectroscopy

### 3.1 Compound 2:

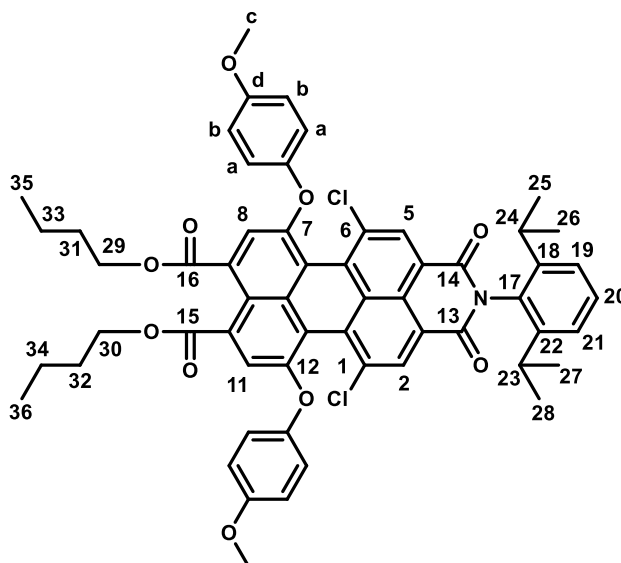

The structure of compound **2** was unambiguously confirmed by a series of systematic 1D and 2D-NMR measurements, namely  $^1\text{H}$ ,  $^{13}\text{C}$ ,  $^{13}\text{C}$ -APT and DEPT-135,  $^1\text{H}$ - $^1\text{H}$  COSY,  $^1\text{H}$ - $^{13}\text{C}$  HSQC,  $^1\text{H}$ - $^{13}\text{C}$  HMBC, and  $^1\text{H}$ - $^1\text{H}$  NOESY. The complete assignment of peaks in the  $^1\text{H}$ -NMR spectrum is shown in Figure S-3.1. The signals of all through-bond coupled protons were identified using  $^1\text{H}$ - $^1\text{H}$  COSY spectrum (Figure S-3.2). The evidences of the regiospecific substitution at 7- and 12-positions were provided by the  $^1\text{H}$ - $^{13}\text{C}$  HMBC experiment (Figure S-3.3), which clearly showed the cross couplings of ester carbonyl carbons ( $\text{C}^{15}$  and  $\text{C}^{16}$ ) with perylene core protons ( $\text{H}^8$  and  $\text{H}^{11}$ ) and butyl-chain protons ( $\text{H}^{29}$  and  $\text{H}^{30}$ ). Furthermore, the imide carbonyl carbon atoms  $\text{C}^{13}$  and  $\text{C}^{14}$  exhibited the cross couplings with perylene core protons  $\text{H}^2$  and  $\text{H}^5$ . The crucial and final confirmation to the proposed structural assignment was provided by 1D  $^1\text{H}$ - $^1\text{H}$  NOESY experiments (Figure S-3.4) in which through-space cross couplings between  $\text{H}^c$ - $\text{H}^b$ ,  $\text{H}^a$ - $\text{H}^{8,11}$ , and  $\text{H}^{2,5}$ - $\text{H}^{23,24}$  were clearly observed. The identification of all proton-attached carbon atoms was achieved by  $^1\text{H}$ - $^{13}\text{C}$  HSQC spectroscopy (Figure S-3.5).



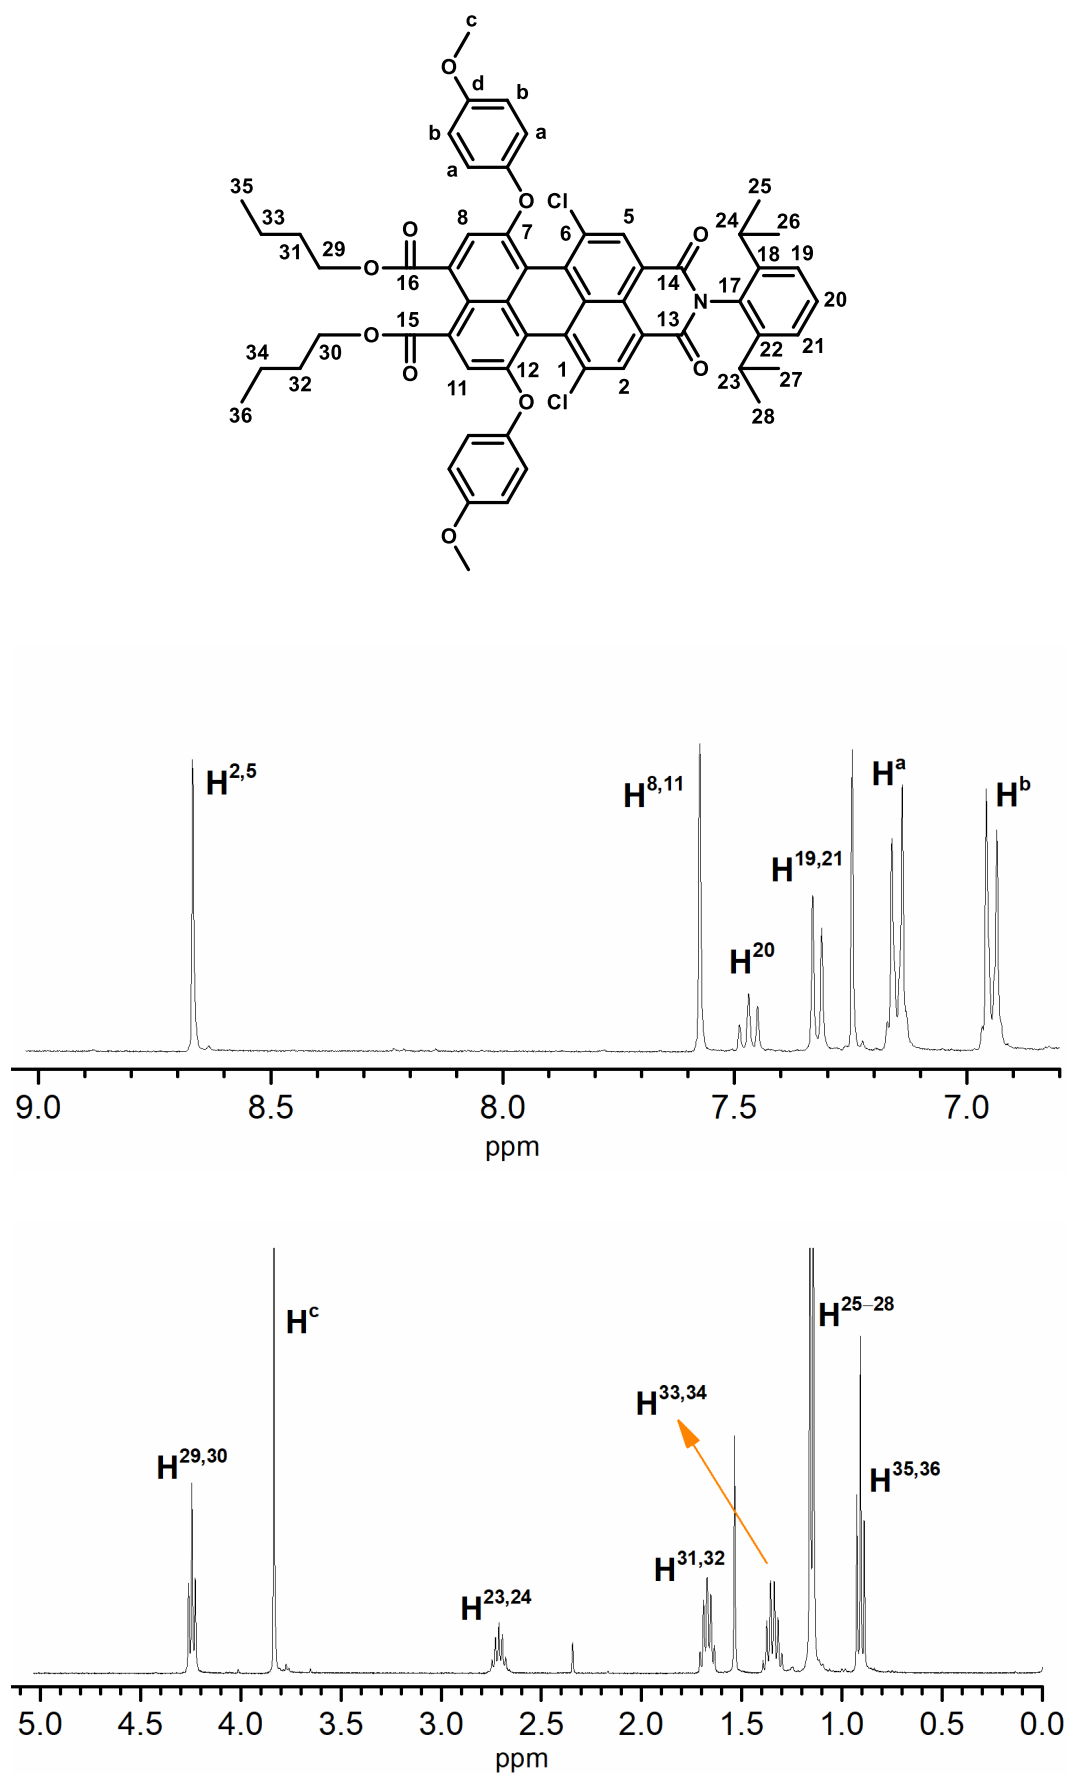

**Figure S-3.1:**  $^1\text{H}$  NMR spectrum (CDCl<sub>3</sub>, 400 MHz) of compound 2 with complete assignments of proton signals (aromatic region at the top and aliphatic region at the bottom).

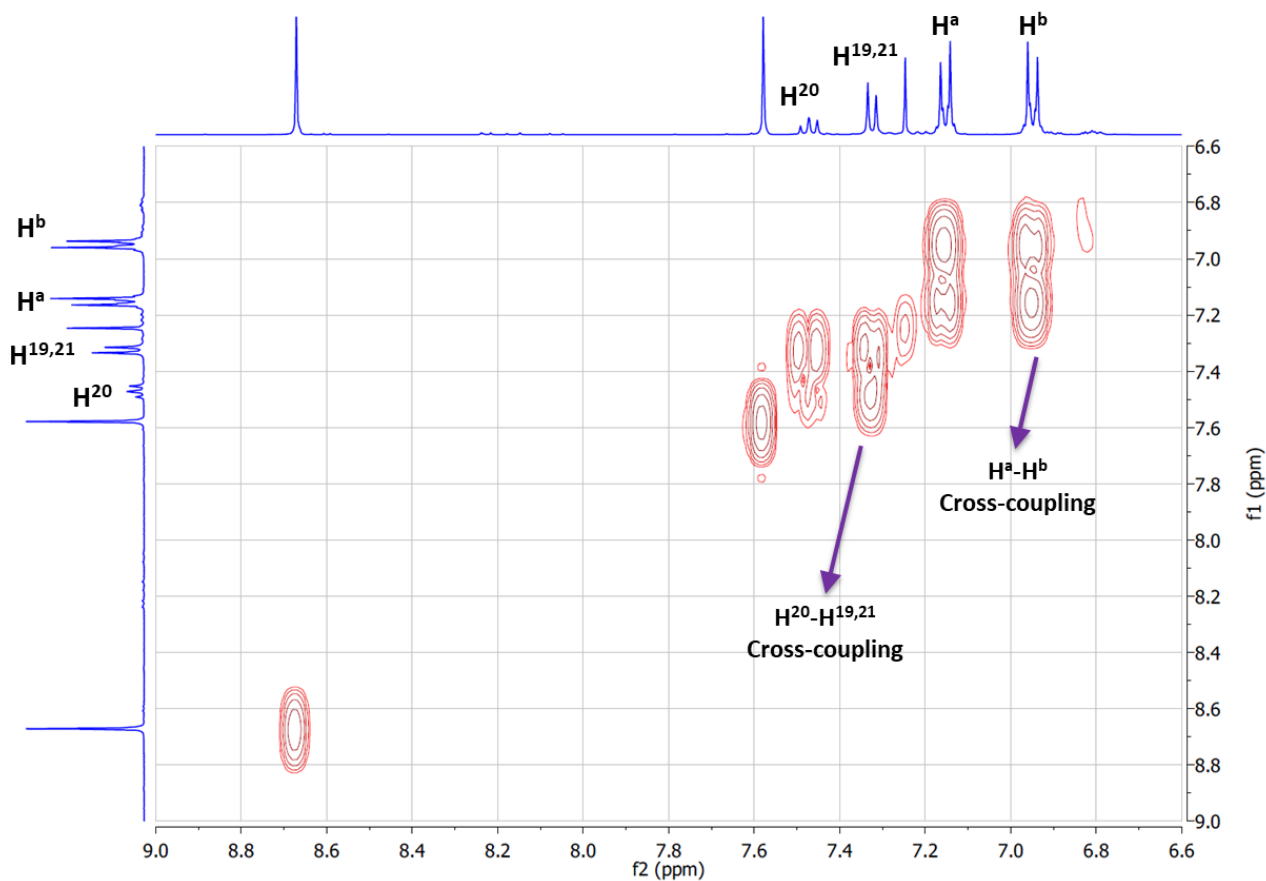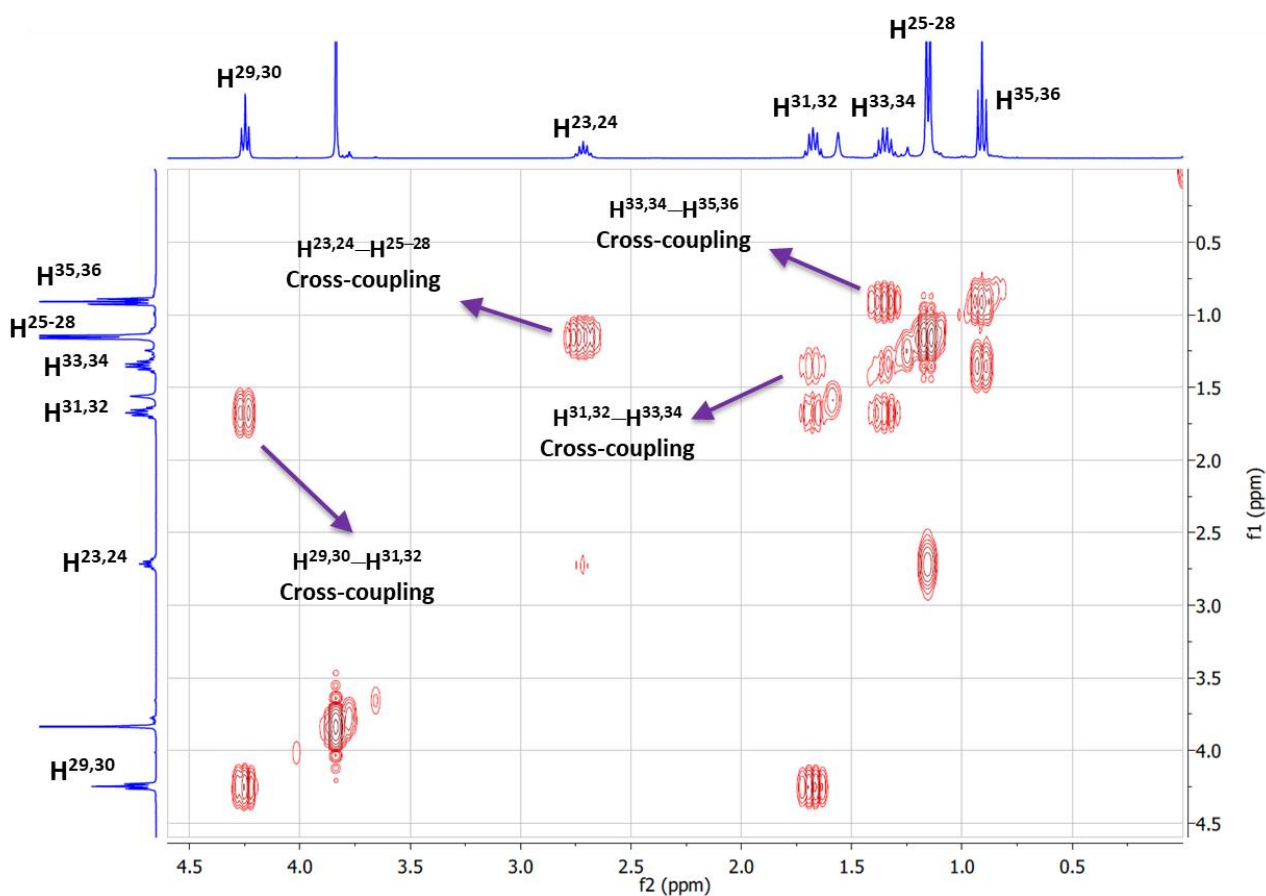

**Figure S-3.2:**  $^1\text{H}-^1\text{H}$  gCOSY NMR spectrum ( $\text{CDCl}_3$ , 400 MHz) of compound **2** with the indication of through-bond coupled protons (aromatic region at the top and aliphatic region at the bottom).

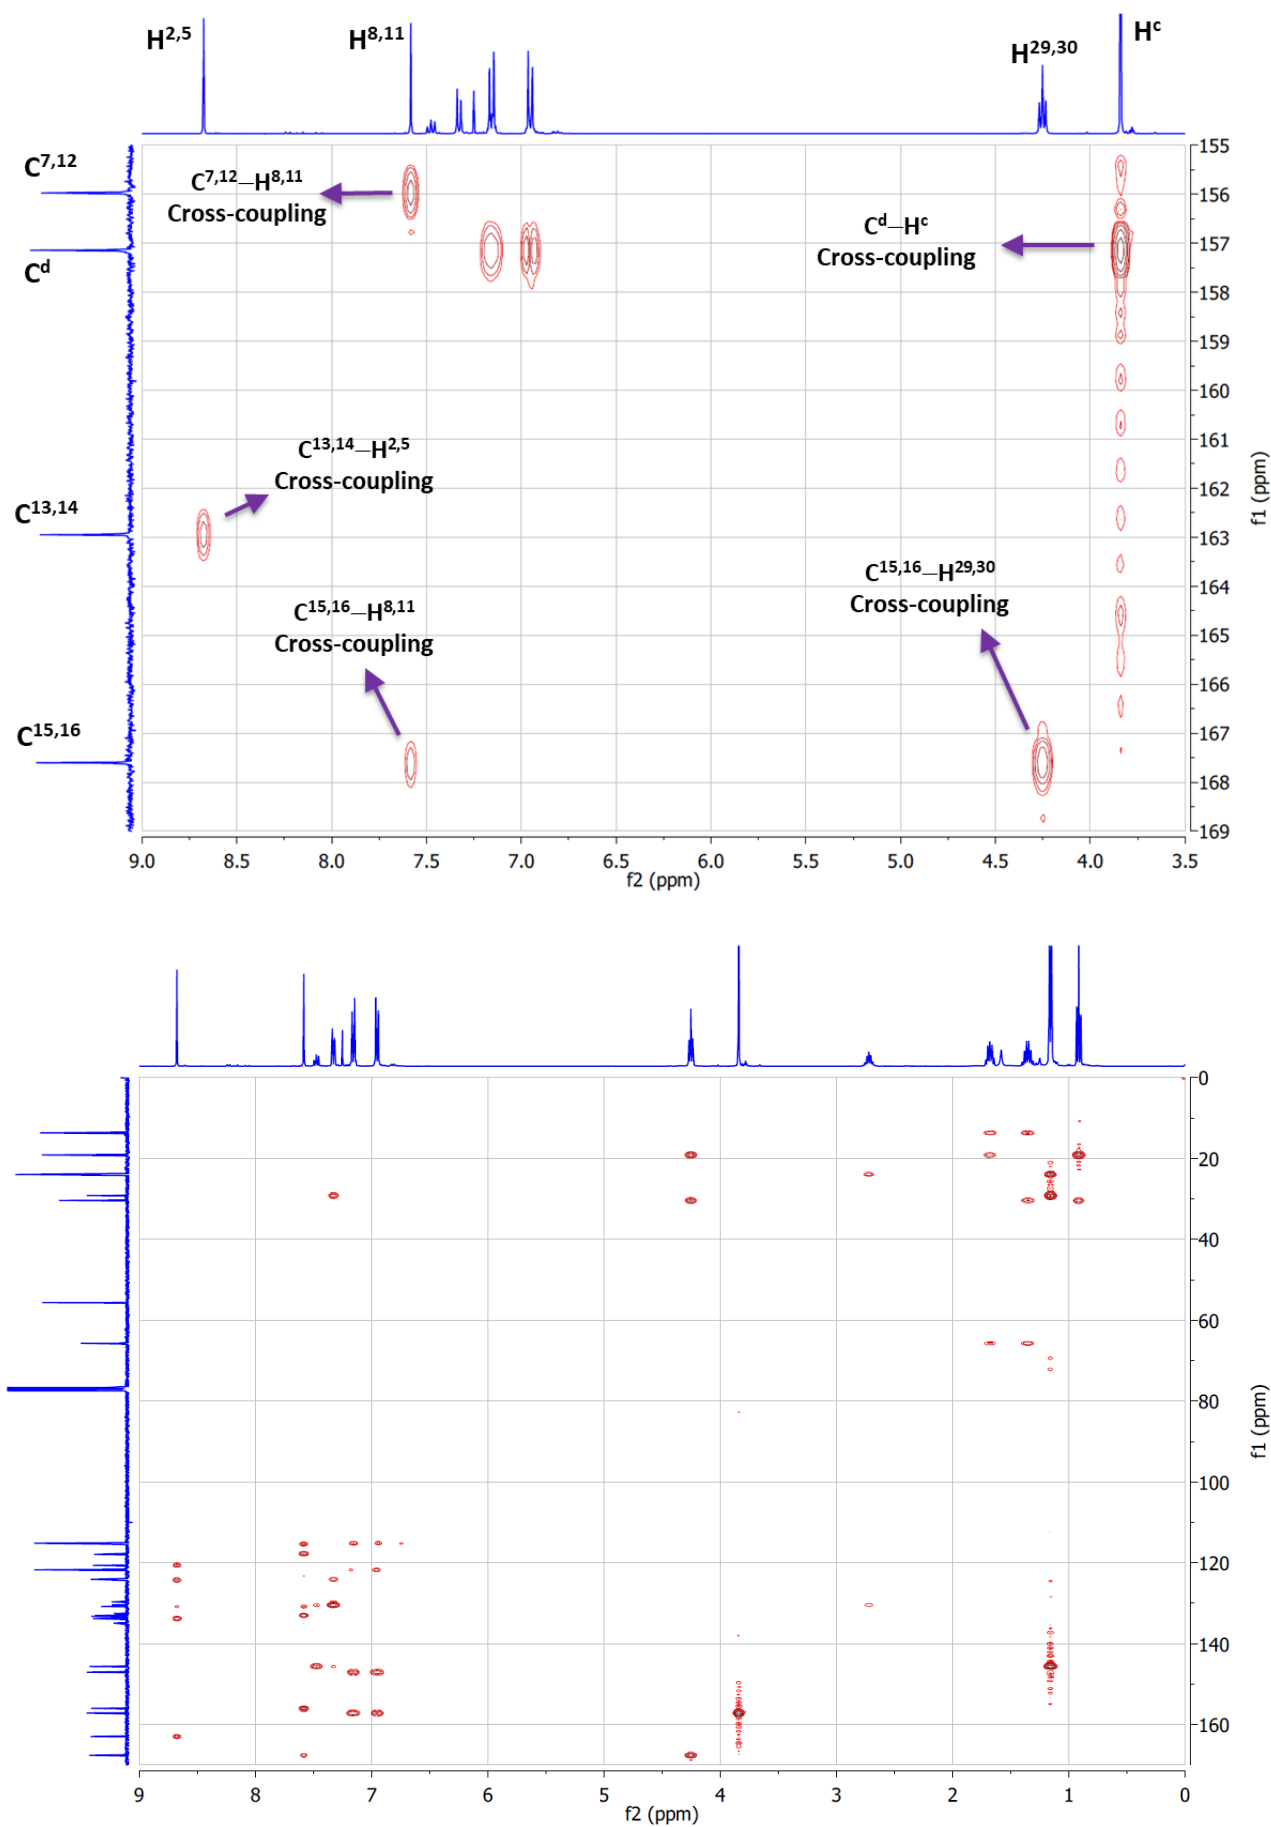

**Figure S-3.3:**  $^1\text{H}$ - $^{13}\text{C}$  gHMBC NMR spectrum ( $\text{CDCl}_3$ , 400 MHz) of compound **2** with the indication of important long-range cross-couplings between proton and carbon atoms (zoomed spectrum at the top and full spectrum at the bottom).

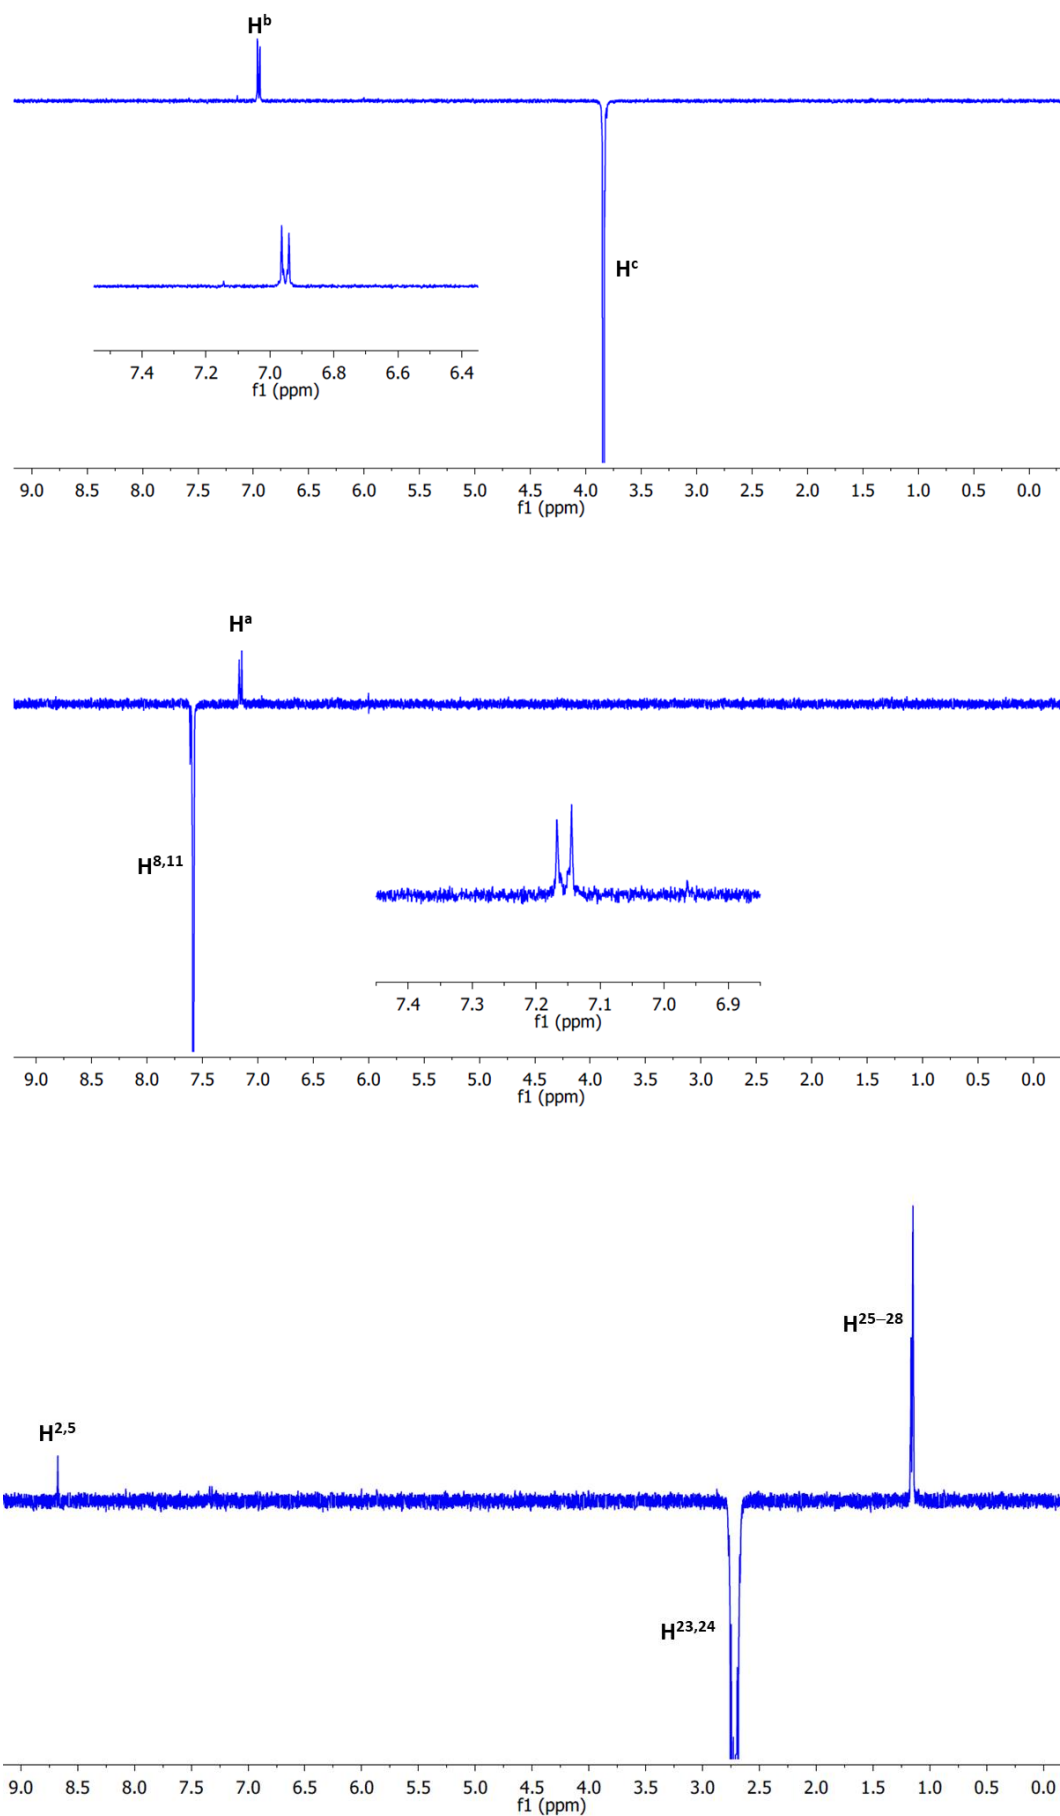

**Figure S-3.4:**  $^1\text{H}$ - $^1\text{H}$  1D NOESY NMR spectra (CDCl<sub>3</sub>, 400 MHz) of compound **2** with the indication of through-space cross-couplings between crucial protons ( $H^c$ - $H^b$  coupling at the top,  $H^a$ - $H^{8,11}$  coupling at the middle, and  $H^{2,5}$ - $H^{23,24}$  coupling at the bottom).

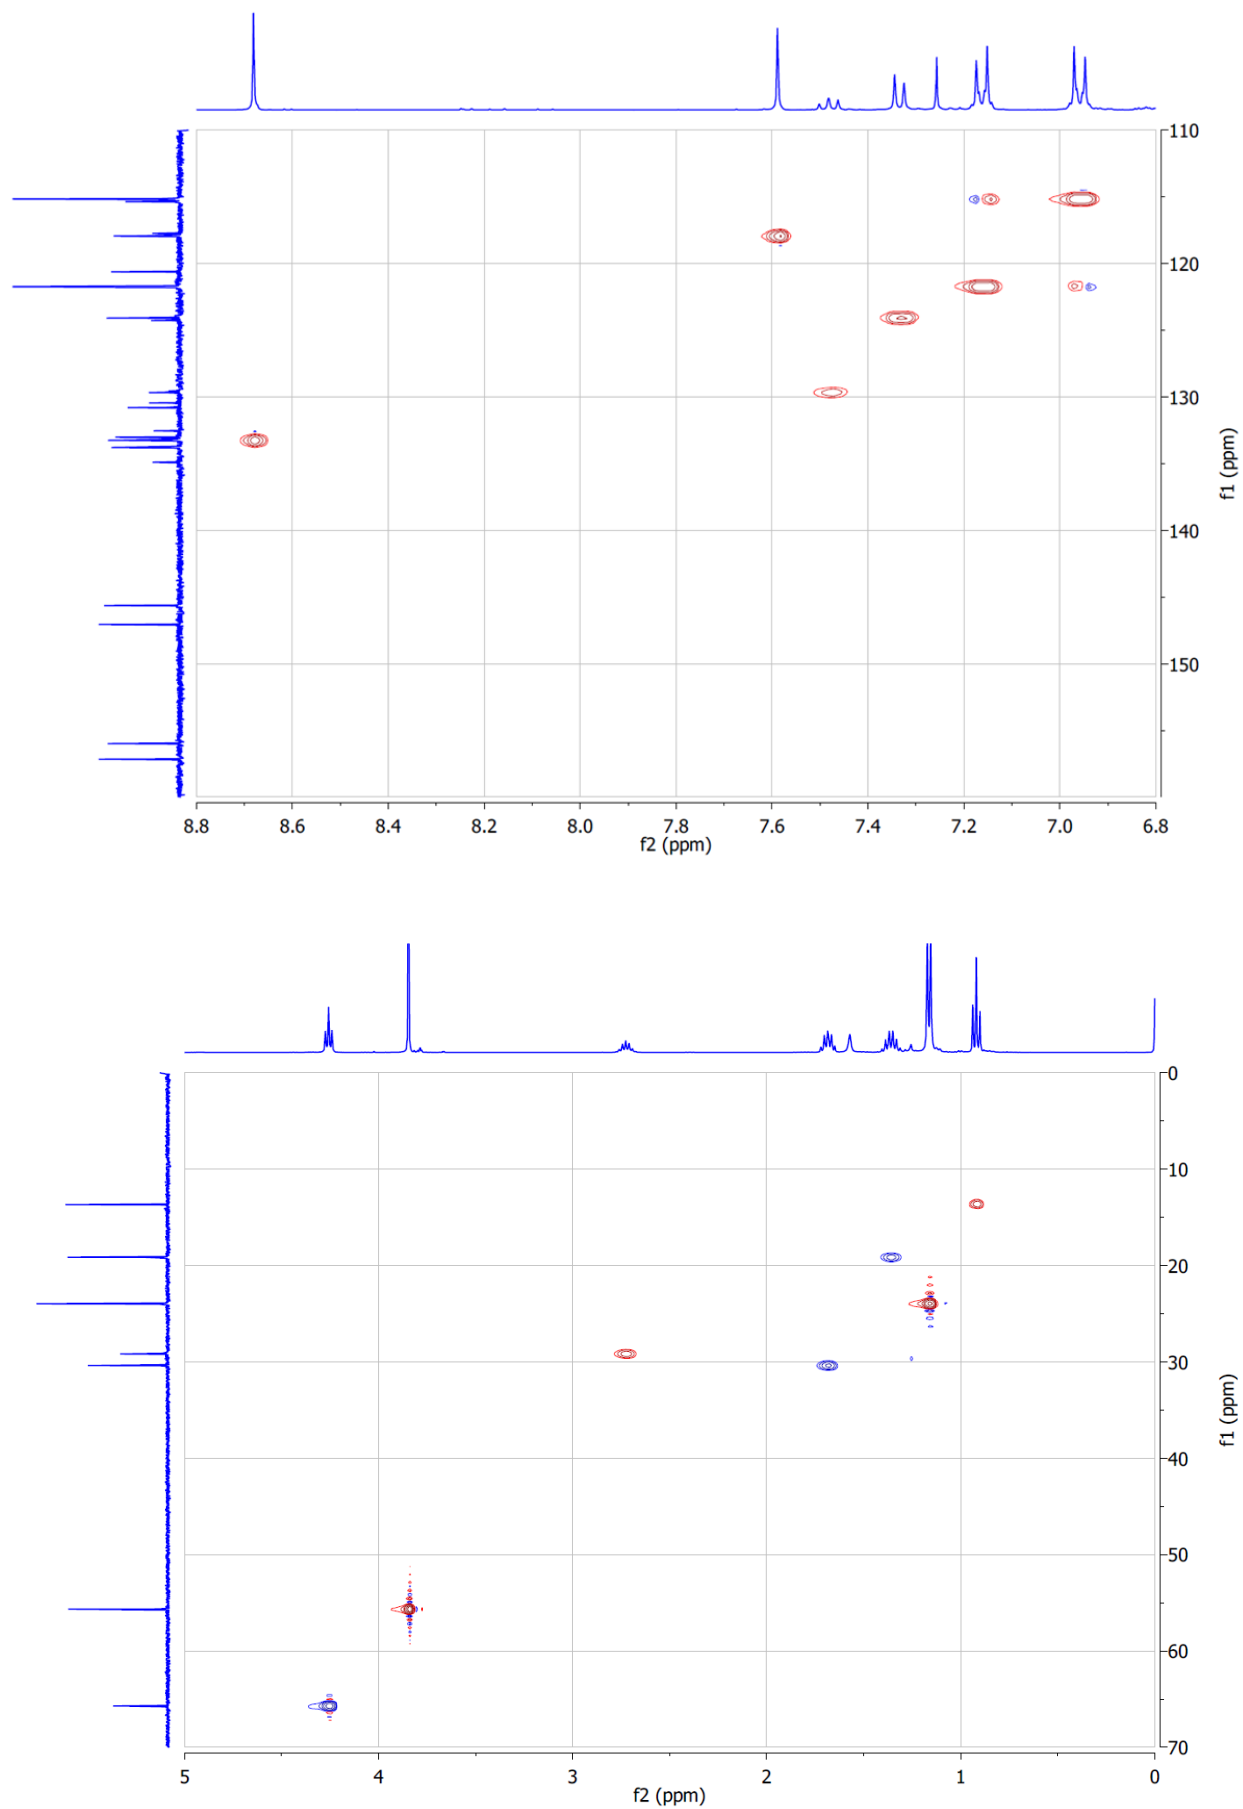

**Figure S-3.5:**  $^1\text{H}$ - $^{13}\text{C}$  gHSQC NMR spectrum ( $\text{CDCl}_3$ , 400 MHz) of compound **2** (Aromatic part at the top and aliphatic part at the bottom).

### 3.2 Compound 3:

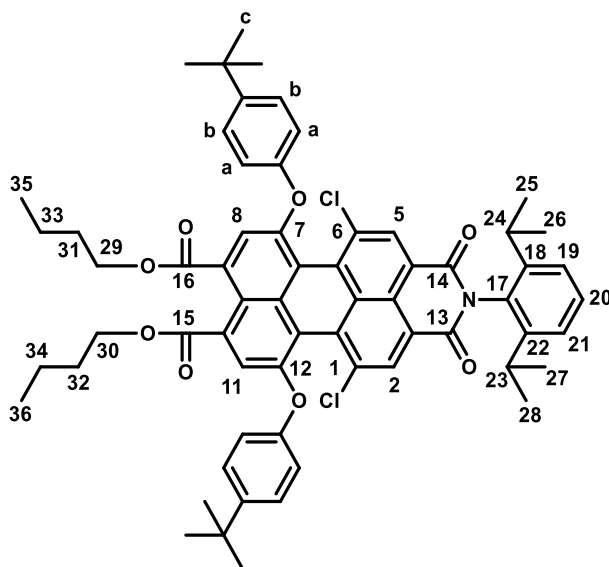

The structure of compound **3** was unambiguously confirmed by a series of systematic 1D and 2D-NMR measurements, namely  $^1\text{H}$ ,  $^{13}\text{C}$ ,  $^{13}\text{C}$ -APT and DEPT-135,  $^1\text{H}$ - $^1\text{H}$  COSY,  $^1\text{H}$ - $^{13}\text{C}$  HSQC,  $^1\text{H}$ - $^{13}\text{C}$  HMBC, and  $^1\text{H}$ - $^1\text{H}$  NOESY. The complete assignment of peaks in the  $^1\text{H}$ -NMR spectrum is shown in Figure S-3.6. The signals of all through-bond coupled protons were identified using  $^1\text{H}$ - $^1\text{H}$  COSY spectrum (Figure S-3.7). The evidences of the regiospecific substitution at 7- and 12-positions were provided by the  $^1\text{H}$ - $^{13}\text{C}$  HMBC experiment (Figure S-3.8), which clearly showed the cross couplings of ester carbonyl carbons ( $\text{C}^{15}$  and  $\text{C}^{16}$ ) with perylene core protons ( $\text{H}^8$  and  $\text{H}^{11}$ ) and butyl-chain protons ( $\text{H}^{29}$  and  $\text{H}^{30}$ ). Furthermore, the imide carbonyl carbon atoms  $\text{C}^{13}$  and  $\text{C}^{14}$  exhibited the cross couplings with perylene core protons  $\text{H}^2$  and  $\text{H}^5$ . The crucial and final confirmation to the proposed structural assignment was provided by 1D  $^1\text{H}$ - $^1\text{H}$  NOESY experiments (Figure S-3.9) in which through-space cross couplings between  $\text{H}^a$ - $\text{H}^{8,11}$ , and  $\text{H}^{2,5}$ - $\text{H}^{23,24}$  were clearly observed. The identification of all proton-attached carbon atoms was achieved by  $^1\text{H}$ - $^{13}\text{C}$  HSQC spectroscopy (Figure S-3.10).

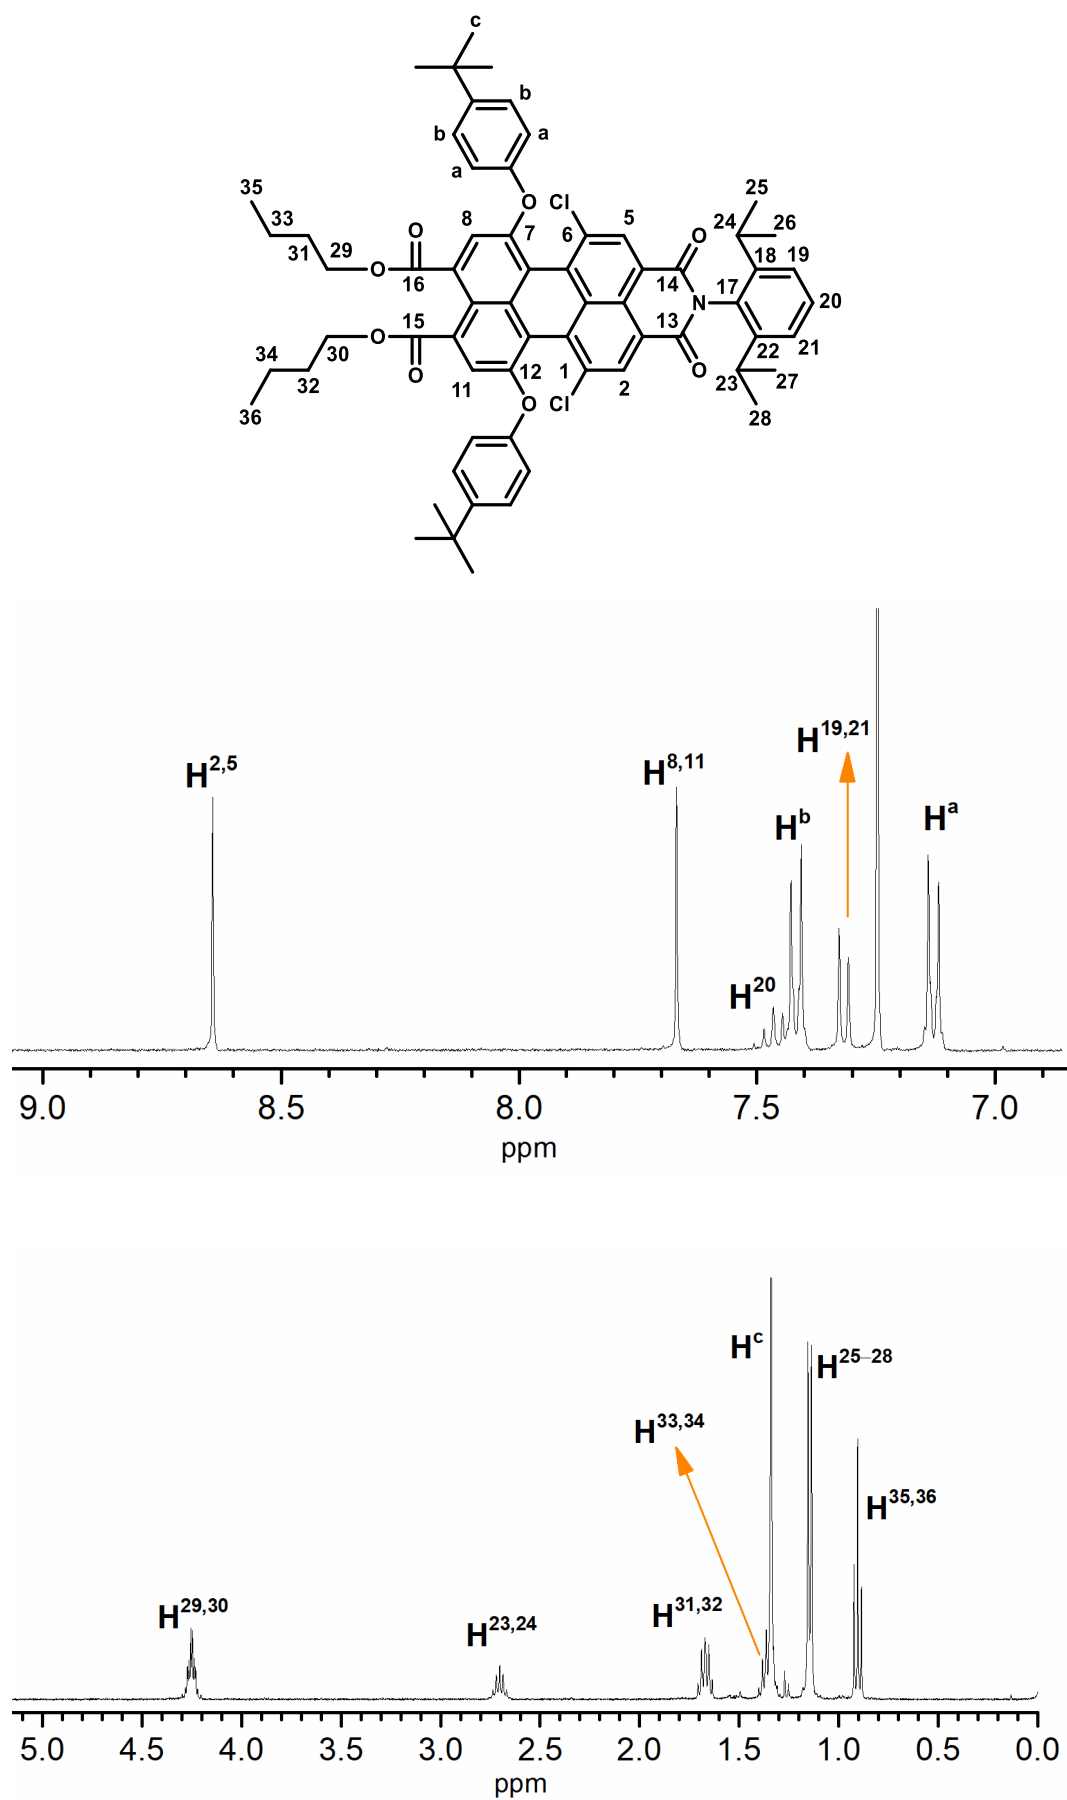

**Figure S-3.6:**  $^1\text{H}$  NMR spectrum ( $\text{CDCl}_3$ , 400 MHz) of compound **3** with complete assignments of proton signals (aromatic region at the top and aliphatic region at the bottom).

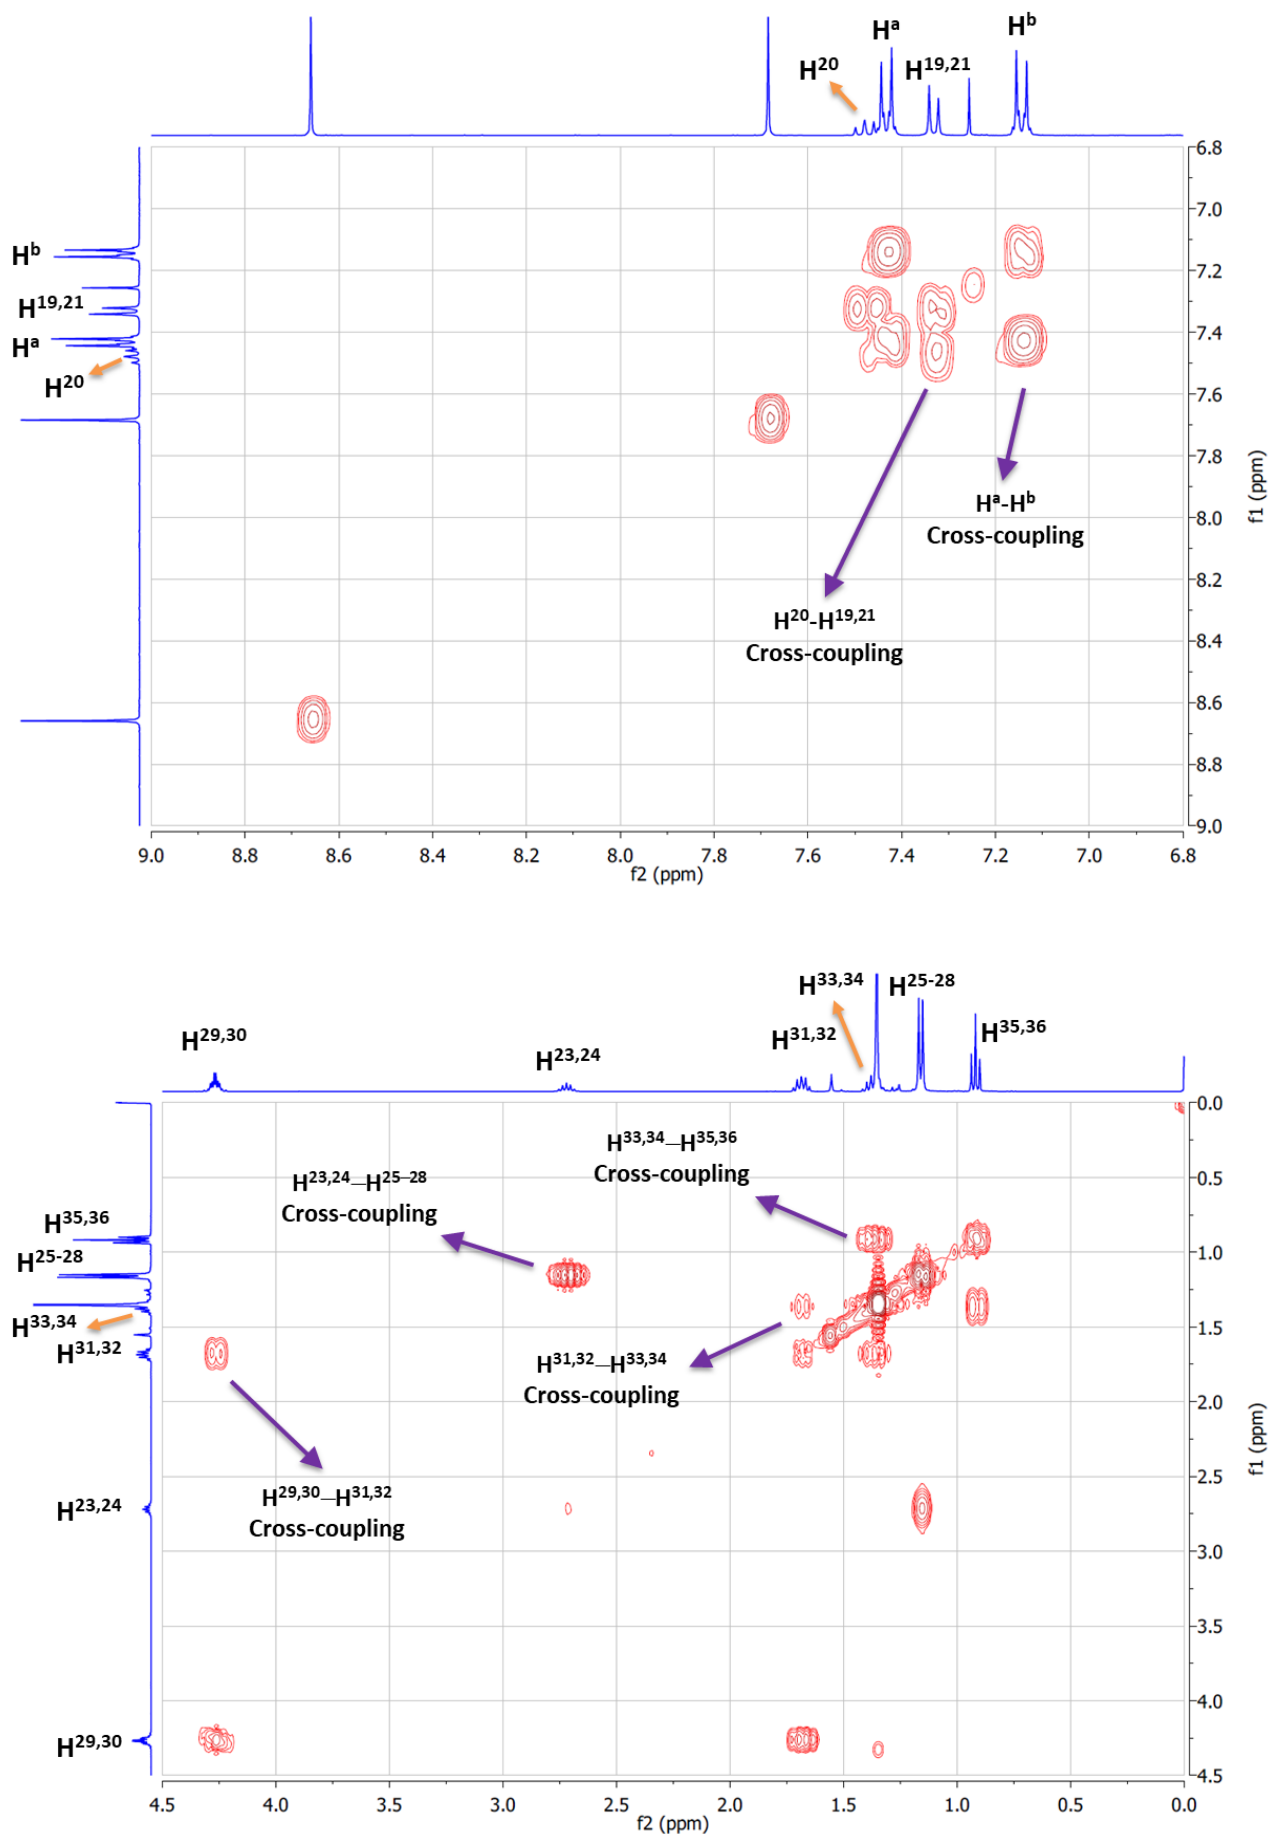

**Figure S-3.7:**  $^1\text{H}$ - $^1\text{H}$  gCOSY NMR spectrum ( $\text{CDCl}_3$ , 400 MHz) of compound **3** with the indication of through-bond coupled protons (aromatic region at the top and aliphatic region at the bottom).



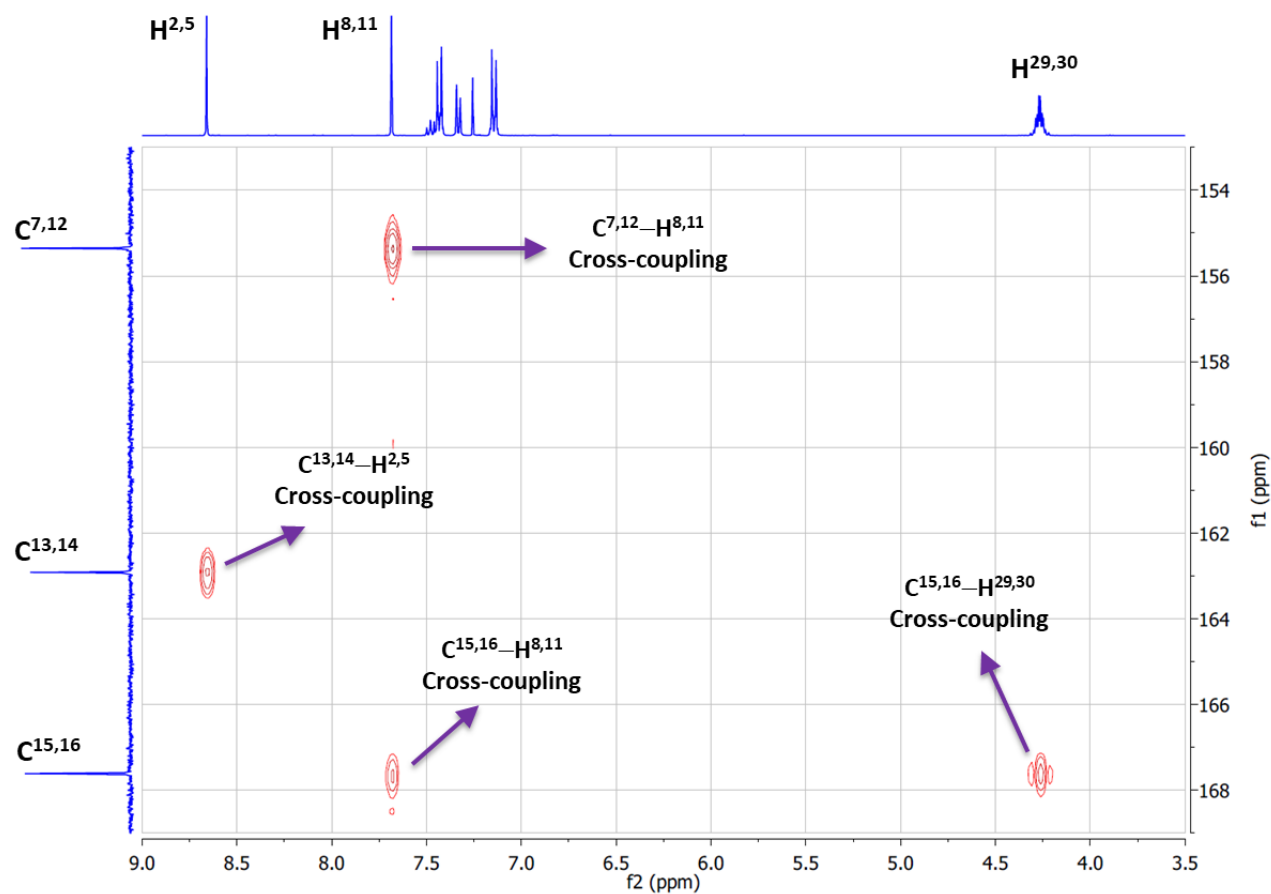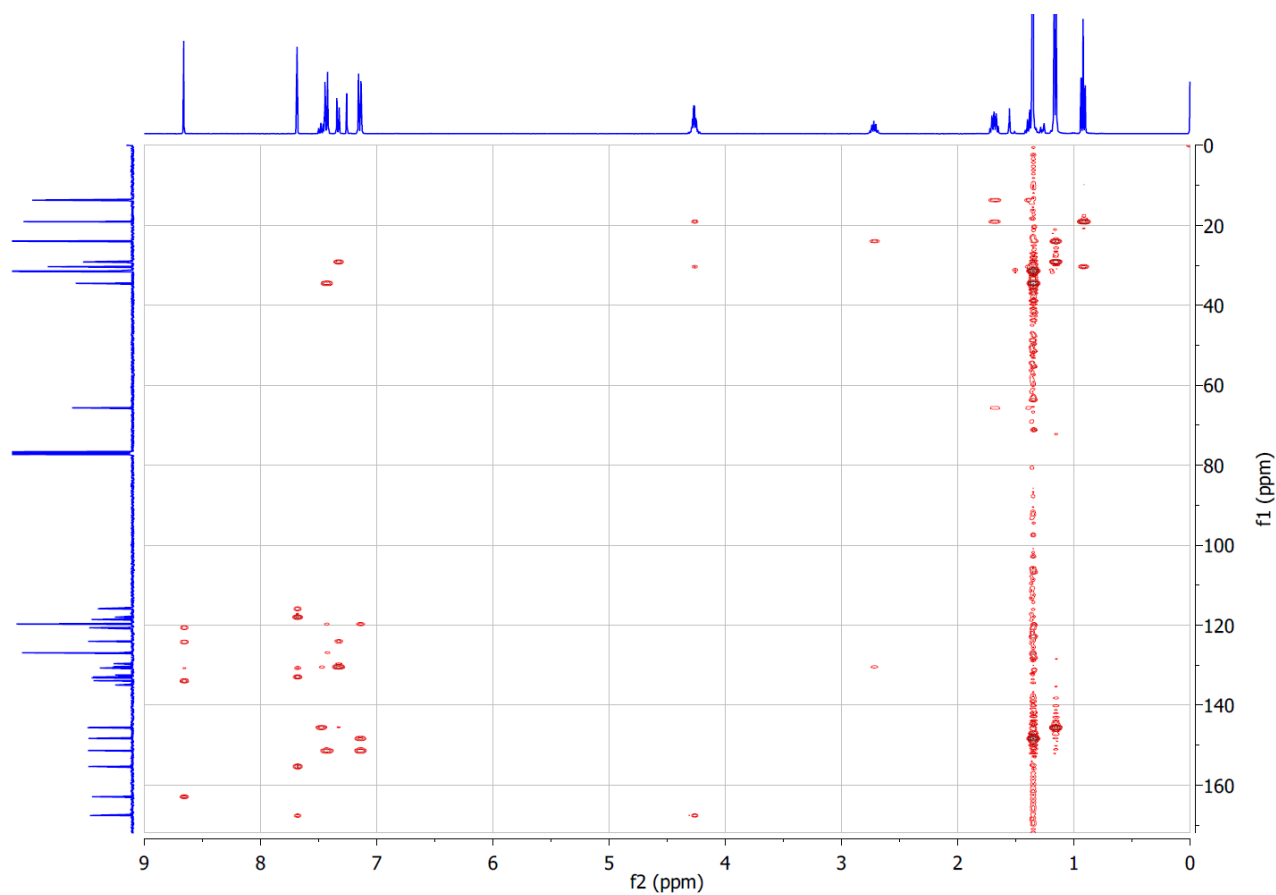

**Figure S-3.8:**  $^1\text{H}$ - $^{13}\text{C}$  gHMBC NMR spectrum ( $\text{CDCl}_3$ , 400 MHz) of compound **3** with the indication of important long-range cross-couplings between proton and carbon atoms (zoomed spectrum at the top and full spectrum at the bottom).

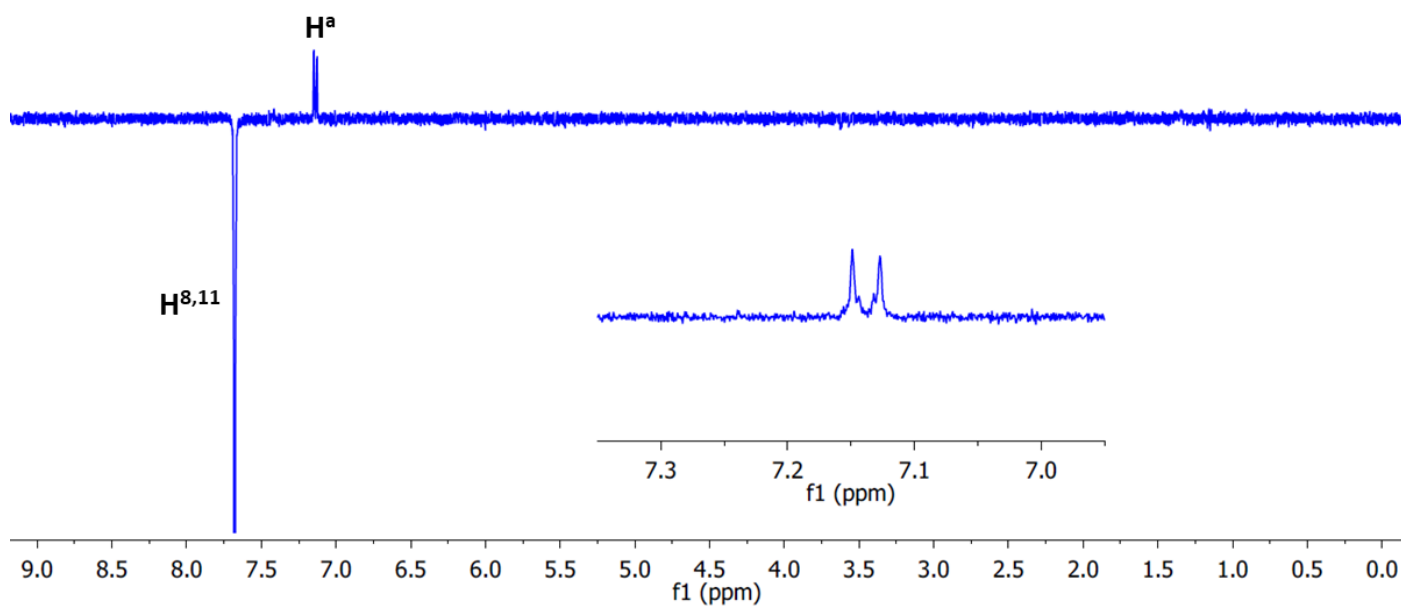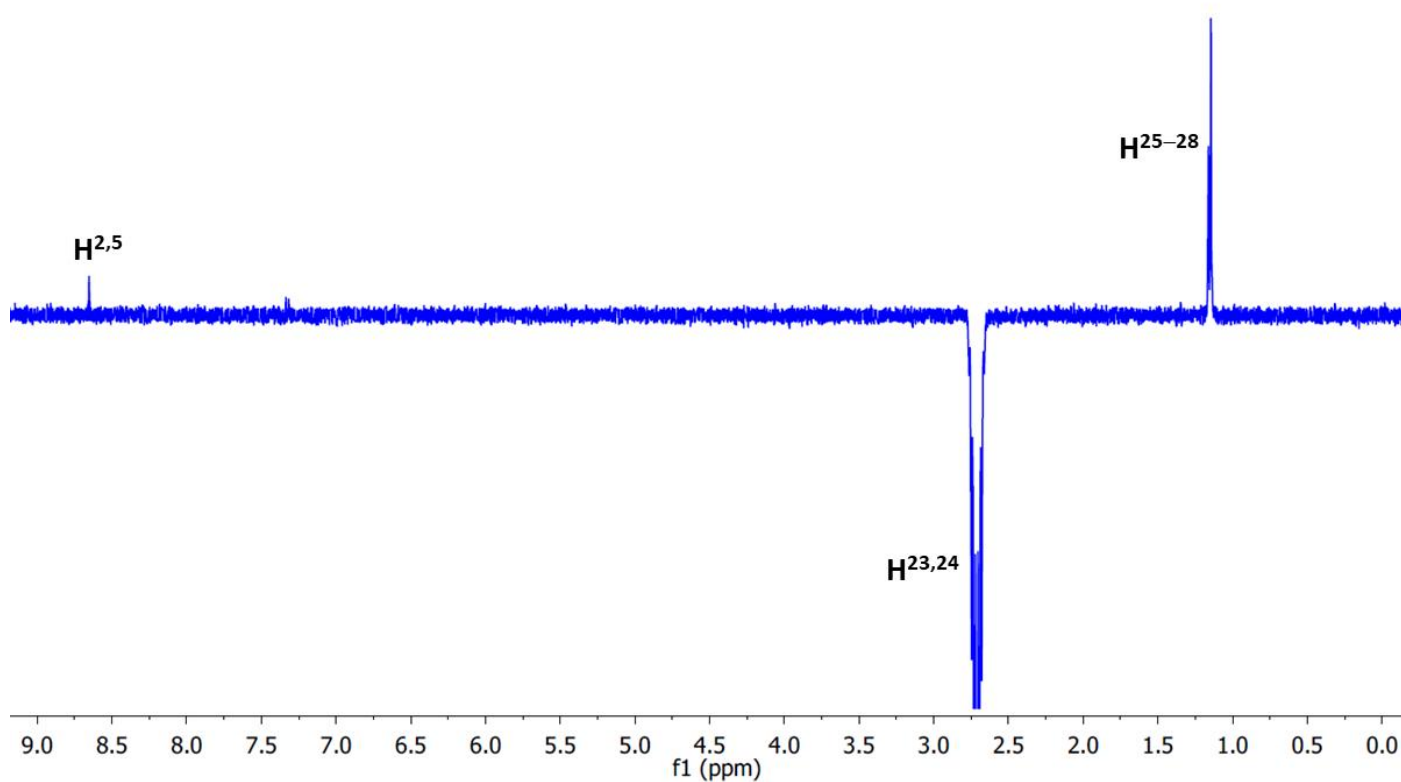

**Figure S-3.9:**  $^1\text{H}$ – $^1\text{H}$  1D NOESY NMR spectra (CDCl<sub>3</sub>, 400 MHz) of compound **3** with the indication of through-space cross-couplings between crucial protons ( $H^a$ – $H^{8,11}$  coupling at the top and  $H^{2,5}$ – $H^{23,24}$  coupling at the bottom).

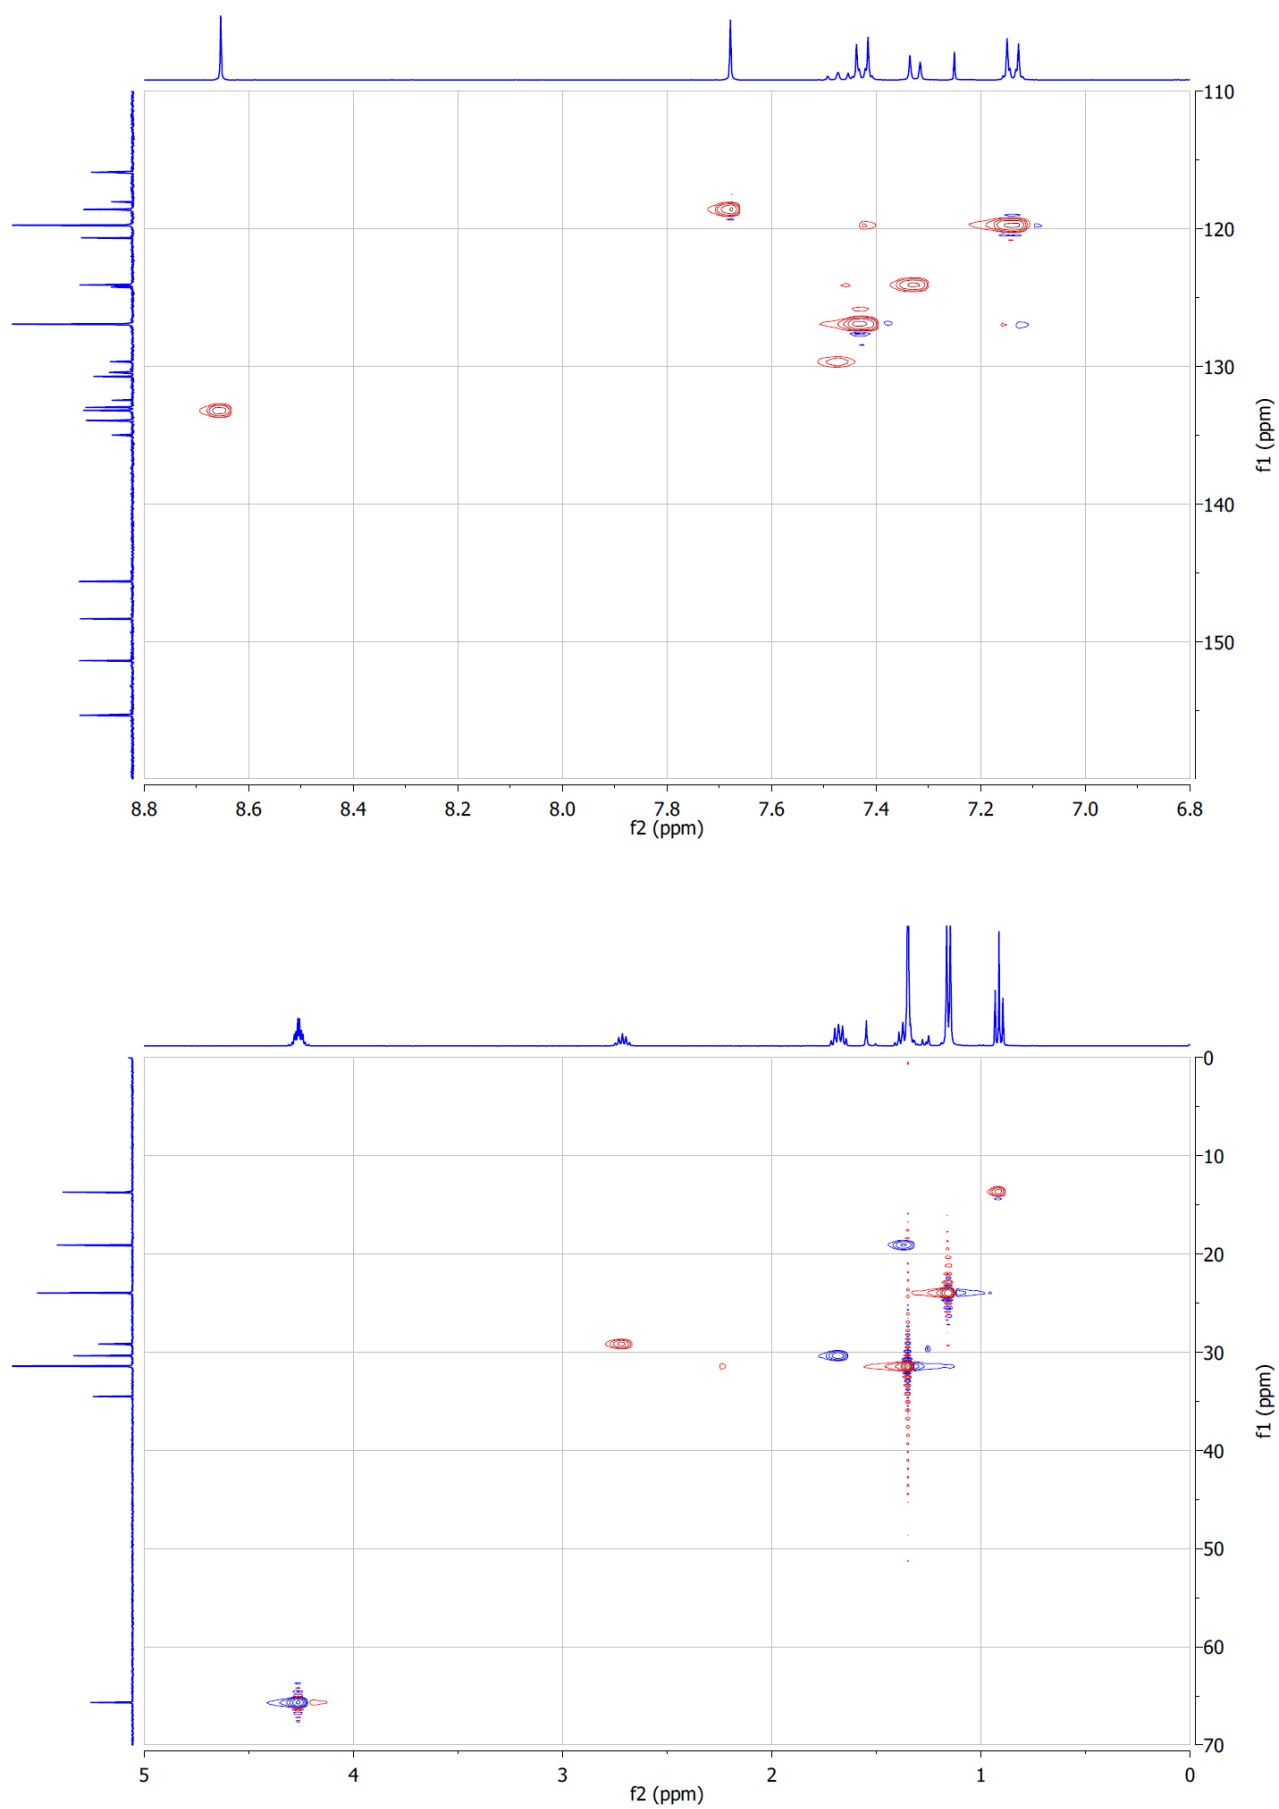

**Figure S-3.10:**  $^1\text{H}$ - $^{13}\text{C}$  gHSQC NMR spectrum ( $\text{CDCl}_3$ , 400 MHz) of compound **3** (Aromatic part at the top and aliphatic part at the bottom).

### 3.3 Compound 4:

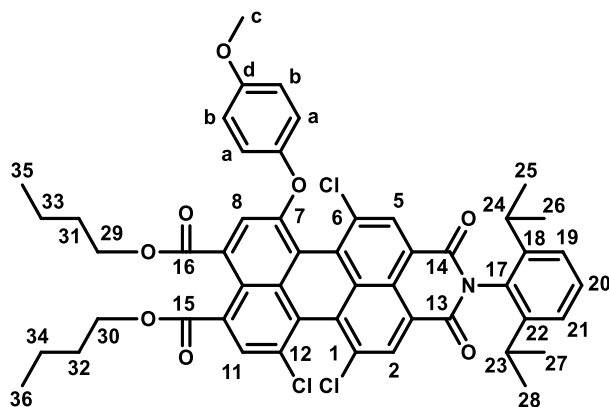

The structure of compound **4** was unambiguously confirmed by a series of systematic 1D and 2D-NMR measurements, namely  $^1\text{H}$ -,  $^{13}\text{C}$ -,  $^{13}\text{C}$ -APT and DEPT-135,  $^1\text{H}$ - $^1\text{H}$  COSY,  $^1\text{H}$ - $^{13}\text{C}$  HSQC,  $^1\text{H}$ - $^{13}\text{C}$  HMBC, and  $^1\text{H}$ - $^1\text{H}$  NOESY. The complete assignment of peaks in the  $^1\text{H}$ -NMR spectrum is shown in Figure S-3.11. The signals of all through-bond coupled protons were identified using  $^1\text{H}$ - $^1\text{H}$  COSY spectrum (Figure S-3.12). The evidences of the regiospecific substitution at 7-position were provided by the  $^1\text{H}$ - $^{13}\text{C}$  HMBC experiment (Figure S-3.13), which clearly showed the cross couplings of ester carbonyl carbon  $\text{C}^{16}$  with perylene core protons  $\text{H}^8$  and butyl chain protons  $\text{H}^{29}$ . Furthermore, the imide carbonyl carbon atoms  $\text{C}^{13}$  and  $\text{C}^{14}$  exhibited the cross couplings with perylene core protons  $\text{H}^2$  and  $\text{H}^5$ . The crucial and final confirmation to the proposed structural assignment was provided by 1D  $^1\text{H}$ - $^1\text{H}$  NOESY experiments (Figure S-3.14) in which through-space cross couplings between  $\text{H}^c$ - $\text{H}^b$  and  $\text{H}^a$ - $\text{H}^8$  were clearly observed. The identification of all proton-attached carbon atoms was achieved by  $^1\text{H}$ - $^{13}\text{C}$  HSQC spectroscopy (Figure S-3.15).

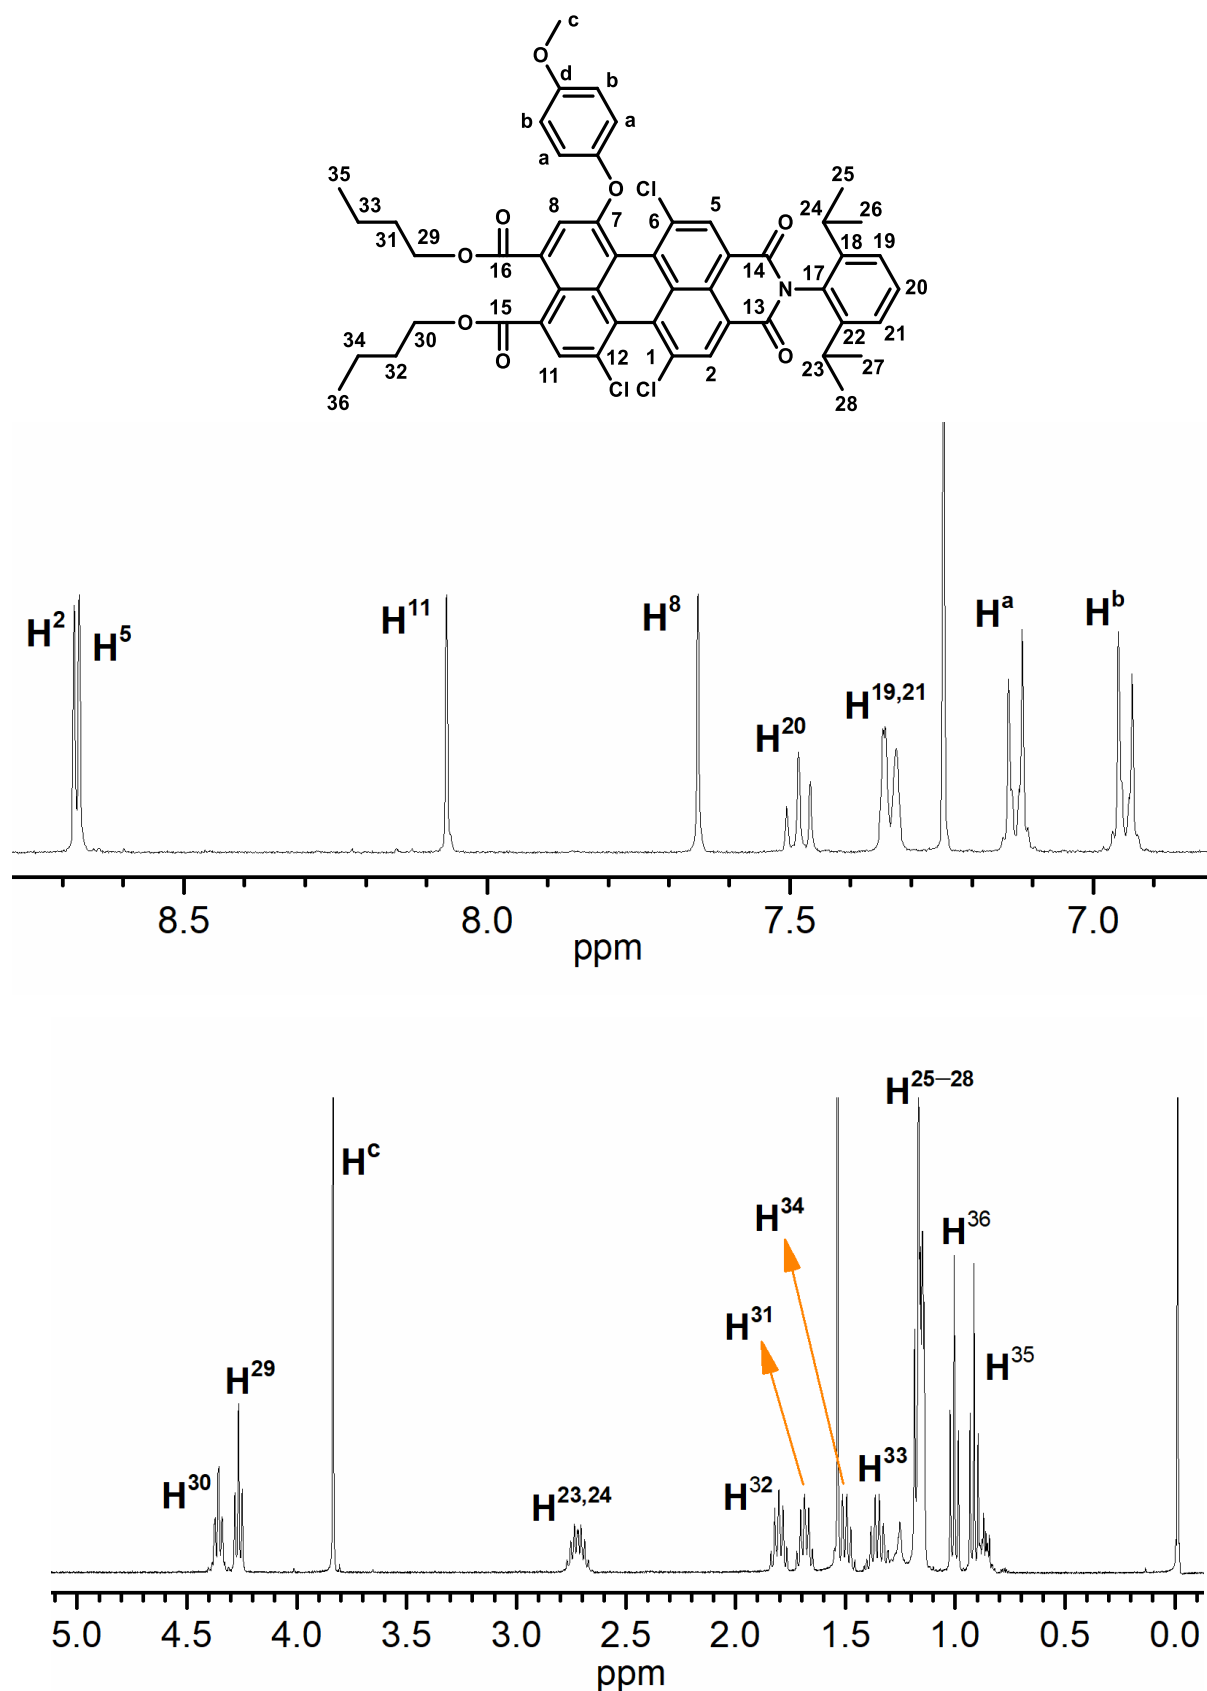

**Figure S-3.11:**  $^1\text{H}$  NMR spectrum ( $\text{CDCl}_3$ , 400 MHz) of compound **4** with complete assignments of proton signals (aromatic region at the top and aliphatic region at the bottom).

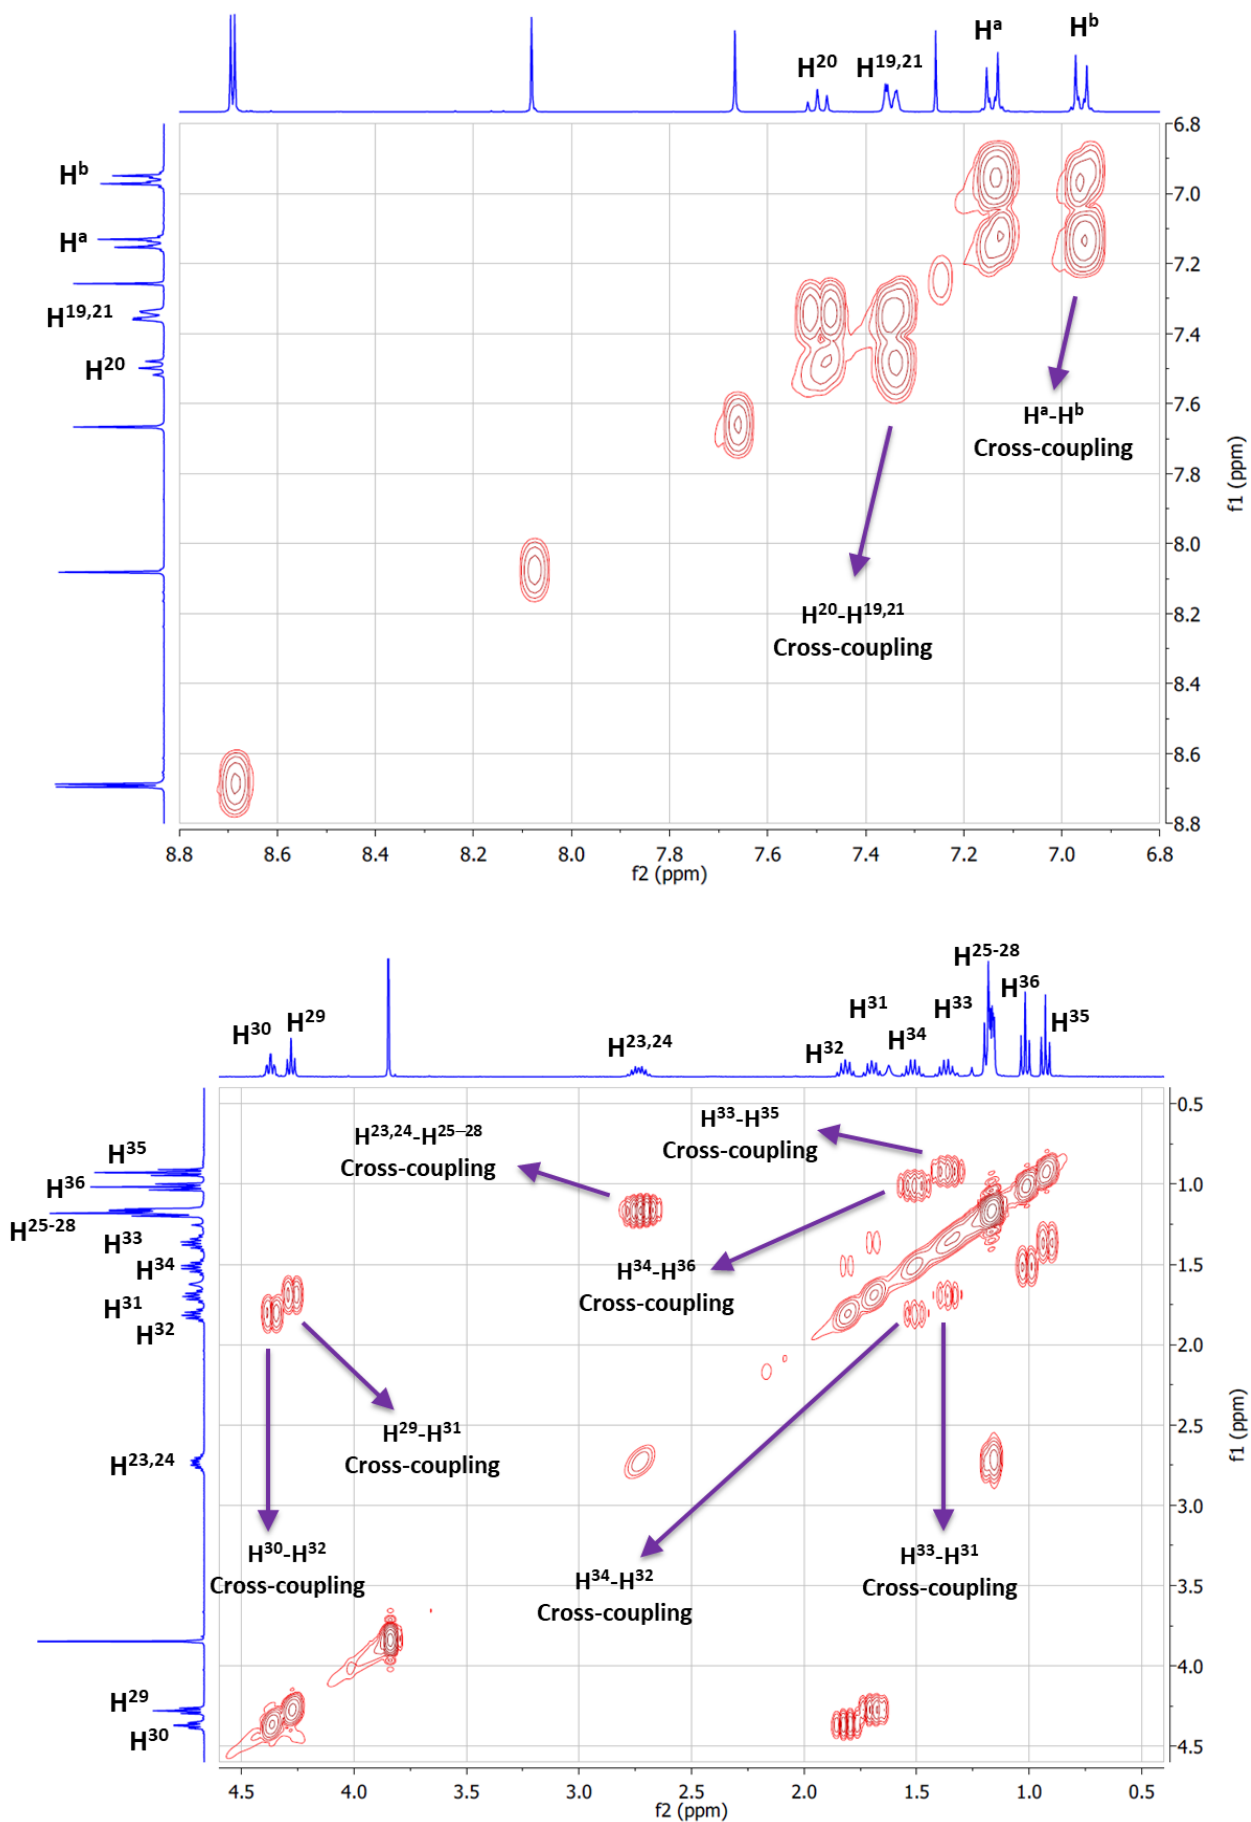

**Figure S-3.12:**  $^1\text{H}$ - $^1\text{H}$  gCOSY NMR spectrum ( $\text{CDCl}_3$ , 400 MHz) of compound **4** with the indication of through-bond coupled protons (aromatic region at the top and aliphatic region at the bottom).

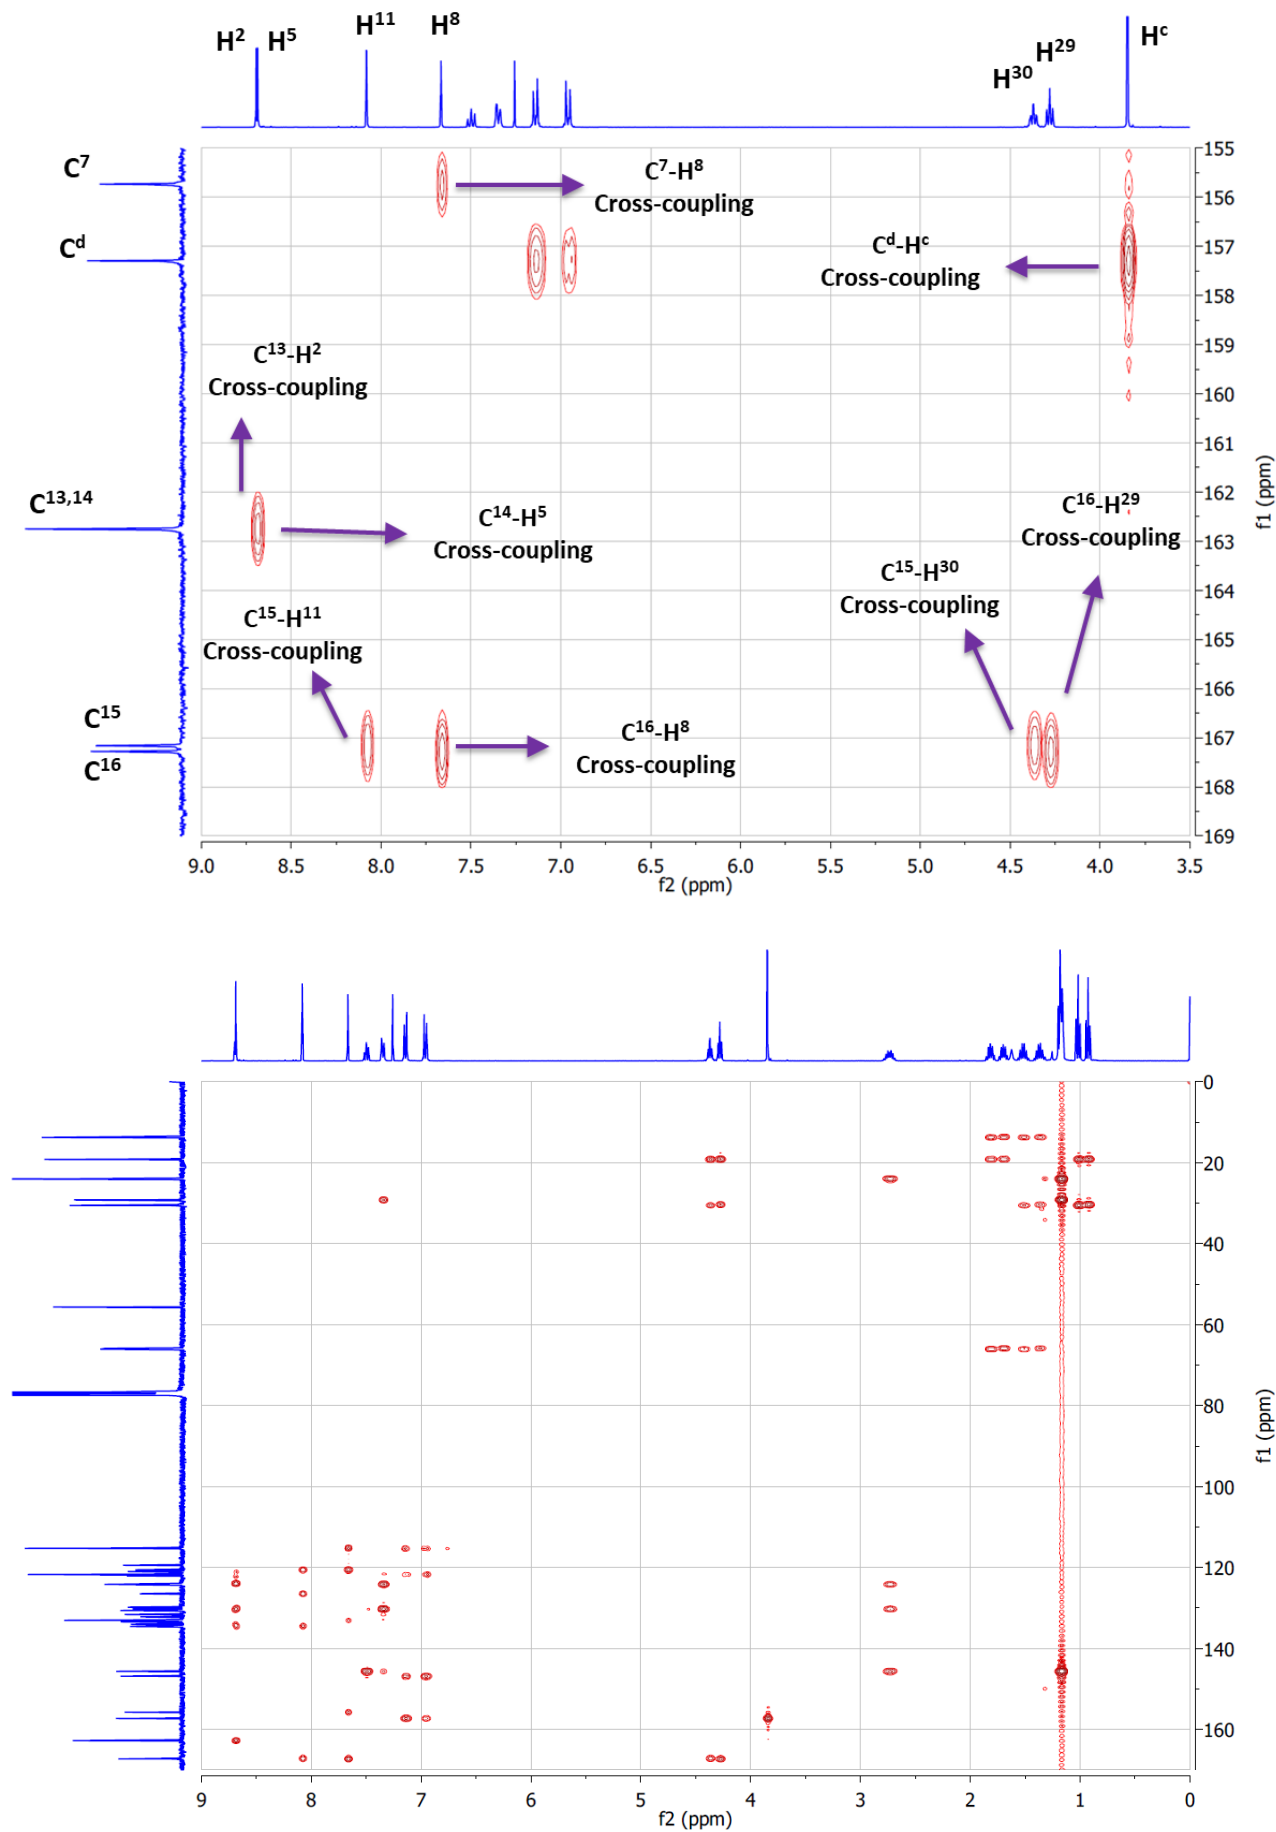

**Figure S-3.13:**  $^1\text{H}$ - $^{13}\text{C}$  gHMBC NMR spectrum ( $\text{CDCl}_3$ , 400 MHz) of compound **4** with the indication of important long-range cross-couplings between proton and carbon atoms (zoomed spectrum at the top and full spectrum at the bottom).

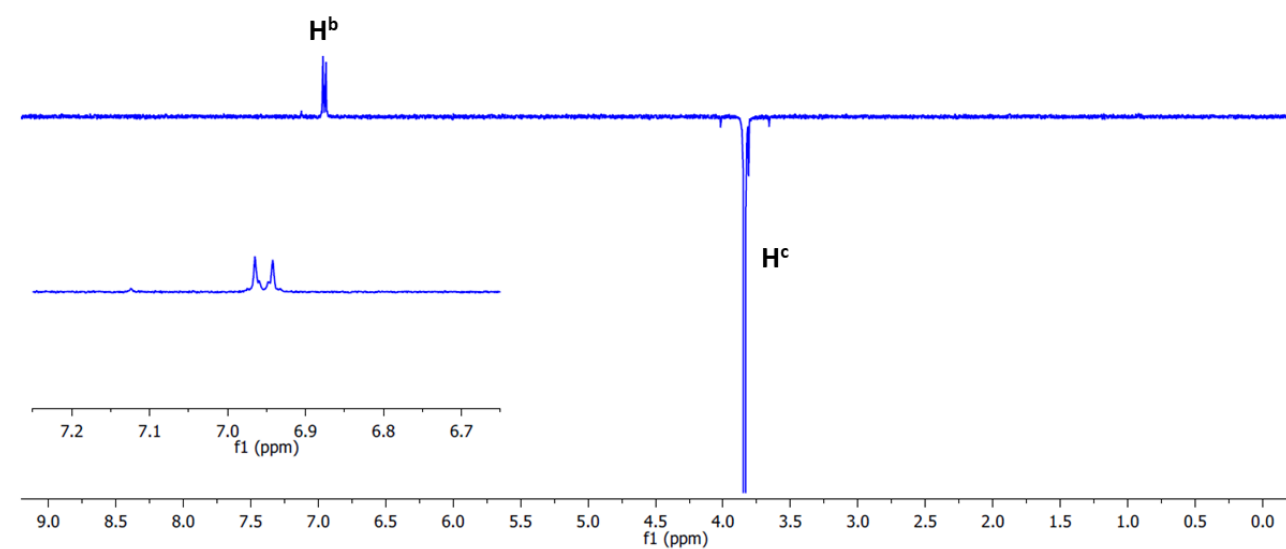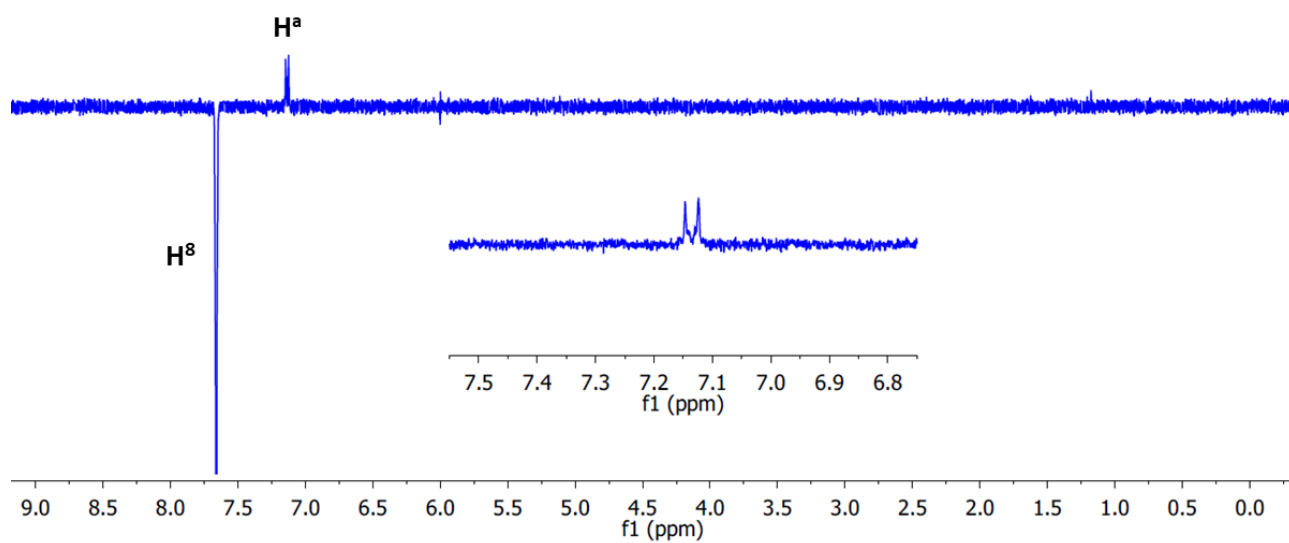

**Figure S-3.14:** <sup>1</sup>H–<sup>1</sup>H 1D NOESY NMR spectra (CDCl<sub>3</sub>, 400 MHz) of compound **4** with the indication of through-space cross-couplings between crucial protons (H<sup>c</sup>–H<sup>b</sup> coupling at the top and H<sup>a</sup>–H<sup>8</sup> coupling at the bottom).



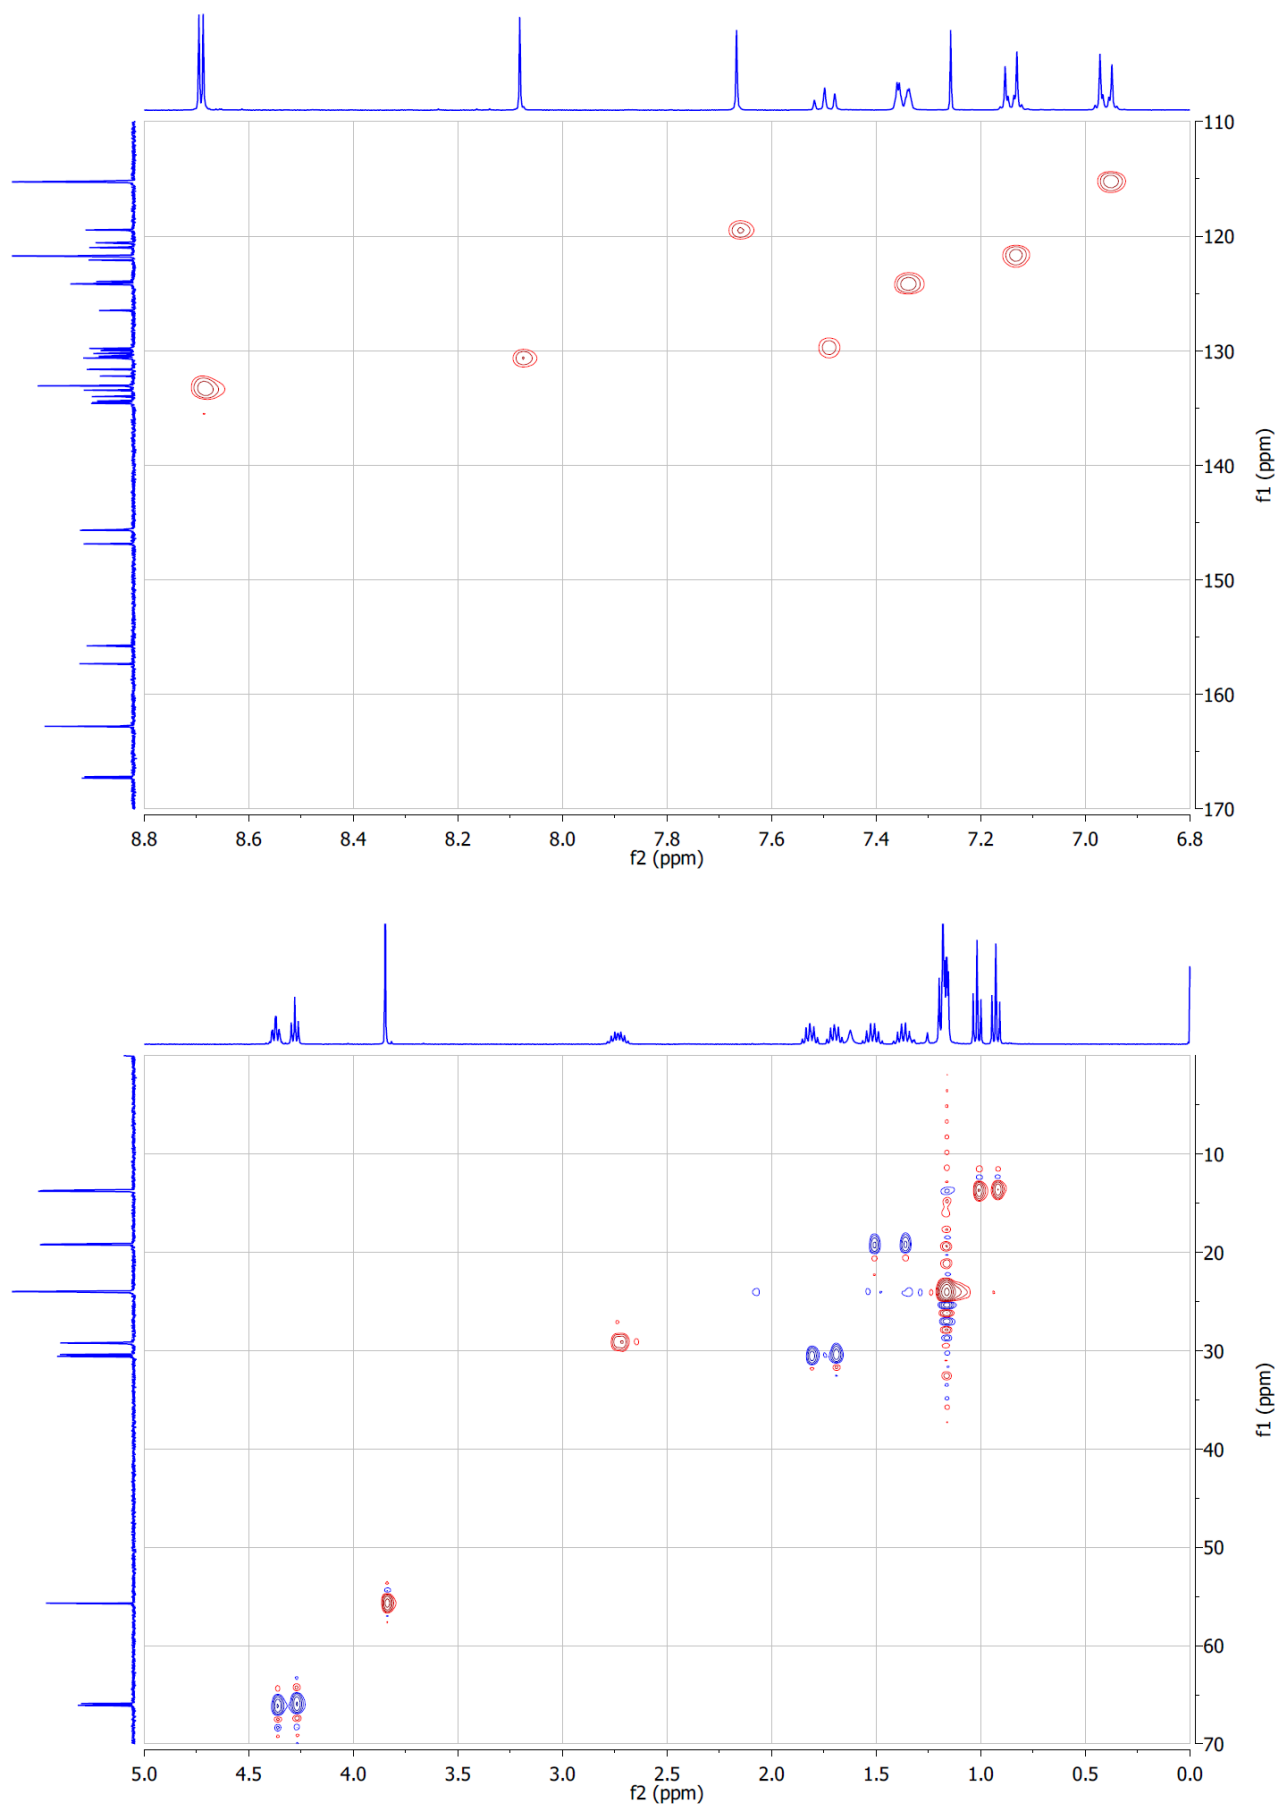

**Figure S-3.15:**  $^1\text{H}$ - $^{13}\text{C}$  HSQC NMR spectrum ( $\text{CDCl}_3$ , 400 MHz) of compound **4** (Aromatic part at the top and aliphatic part at the bottom).

### 3.4 Compound 6:

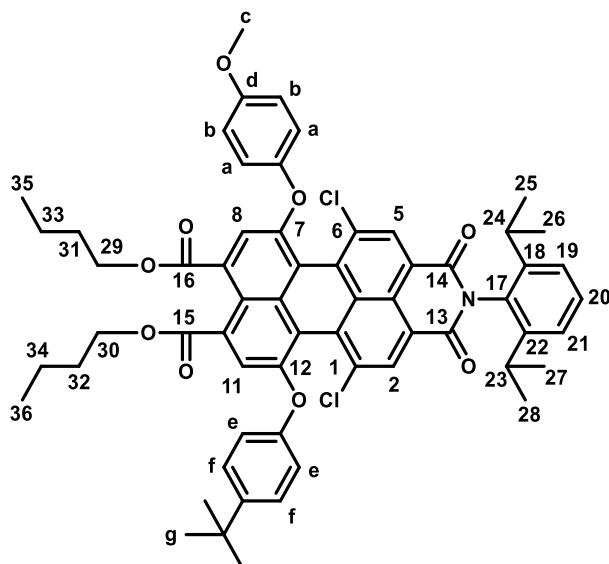

The structure of compound **6** was unambiguously confirmed by a series of systematic 1D and 2D-NMR measurements, namely  $^1\text{H}$ ,  $^{13}\text{C}$ , HOMO 2DJ,  $^{13}\text{C}$ -APT and DEPT-135,  $^1\text{H}$ - $^1\text{H}$  COSY,  $^1\text{H}$ - $^{13}\text{C}$  HSQC,  $^1\text{H}$ - $^{13}\text{C}$  HMBC, and  $^1\text{H}$ - $^1\text{H}$  NOESY. The complete assignment of peaks in the  $^1\text{H}$ -NMR spectrum is shown in Figure S-3.16. The signals of all through-bond coupled protons were identified using  $^1\text{H}$ - $^1\text{H}$  COSY spectrum (Figure S-3.17). The first evidences of regiospecific substitution of 4-methoxyphenoxy- and 4-*tert*-butylphenoxy at 7- and 12-positions, respectively, were provided by the  $^1\text{H}$ - $^{13}\text{C}$  HMBC experiment (Figure S-3.18). This clearly showed the cross couplings of ester carbonyl carbons ( $\text{C}^{15}$  and  $\text{C}^{16}$ ) with perylene core protons ( $\text{H}^{11}$  and  $\text{H}^8$ ) and butyl-chain protons ( $\text{H}^{29}$  and  $\text{H}^{30}$ ). Furthermore, the imide carbonyl carbon atoms  $\text{C}^{13}$  and  $\text{C}^{14}$  exhibited the cross couplings with perylene core protons  $\text{H}^2$  and  $\text{H}^5$ . The crucial and final confirmation to the proposed structural assignment was provided by 1D  $^1\text{H}$ - $^1\text{H}$  NOESY experiments (Figure S-3.19) in which through-space cross couplings between  $\text{H}^c$ - $\text{H}^b$ ,  $\text{H}^a$ - $\text{H}^8$ , and  $\text{H}^e$ - $\text{H}^{11}$  were clearly observed. The identification of all proton-attached carbon atoms was achieved by  $^1\text{H}$ - $^{13}\text{C}$  HSQC spectroscopy (Figure S-3.20).

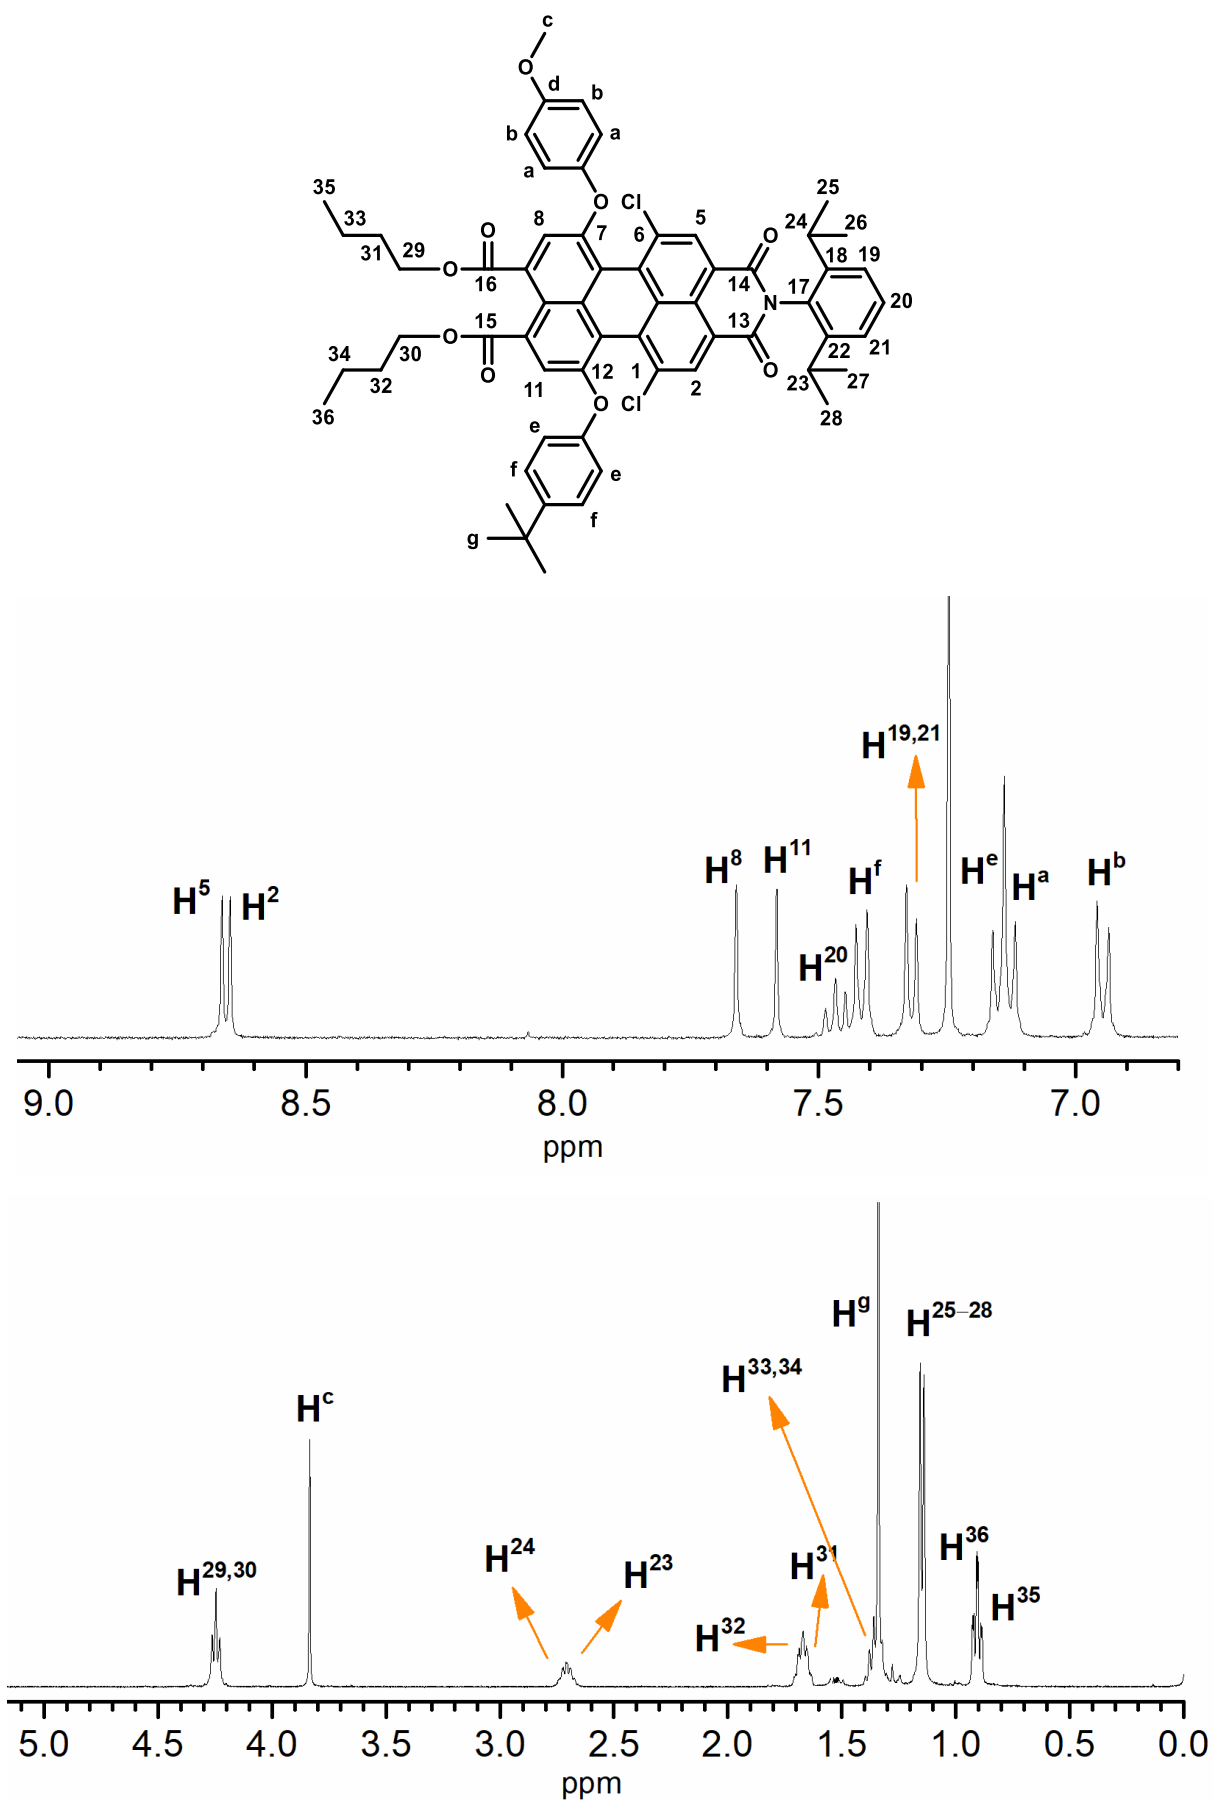

**Figure S-3.16:**  $^1\text{H}$  NMR spectrum ( $\text{CDCl}_3$ , 400 MHz) of compound **6** with complete assignments of proton signals (aromatic region at the top and aliphatic region at the bottom). *Note: The signals of following protons are overlapping, but resolved in Homonuclear J-resolved (HOMO 2DJ) spectrum:  $\text{H}^{23}$  &  $\text{H}^{24}$ ;  $\text{H}^{31}$  &  $\text{H}^{32}$ ;  $\text{H}^{35}$  &  $\text{H}^{36}$ .*

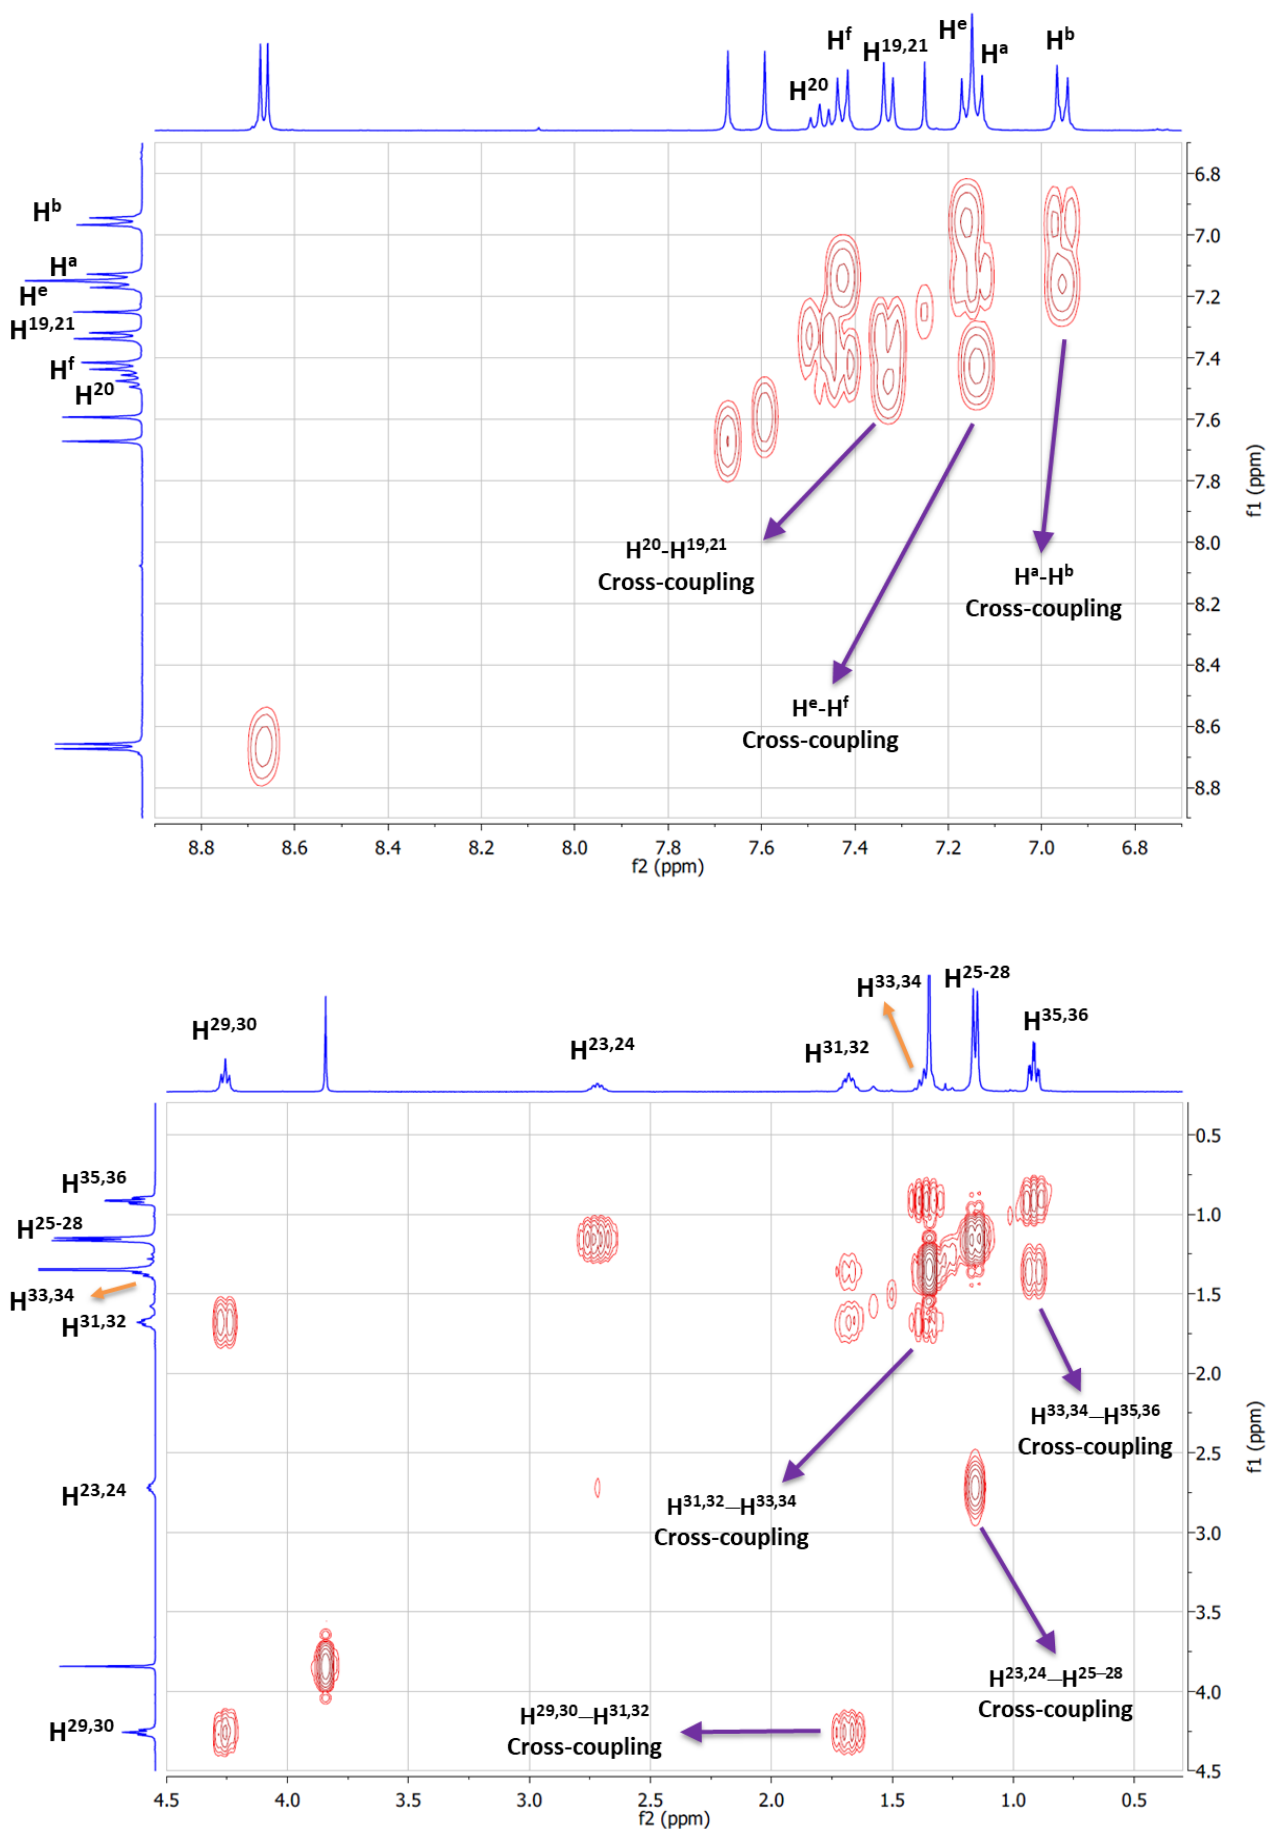

**Figure S-3.17:**  $^1\text{H}$ - $^1\text{H}$  gCOSY NMR spectrum ( $\text{CDCl}_3$ , 400 MHz) of compound **6** with the indication of through-bond coupled protons (aromatic region at the top and aliphatic region at the bottom).

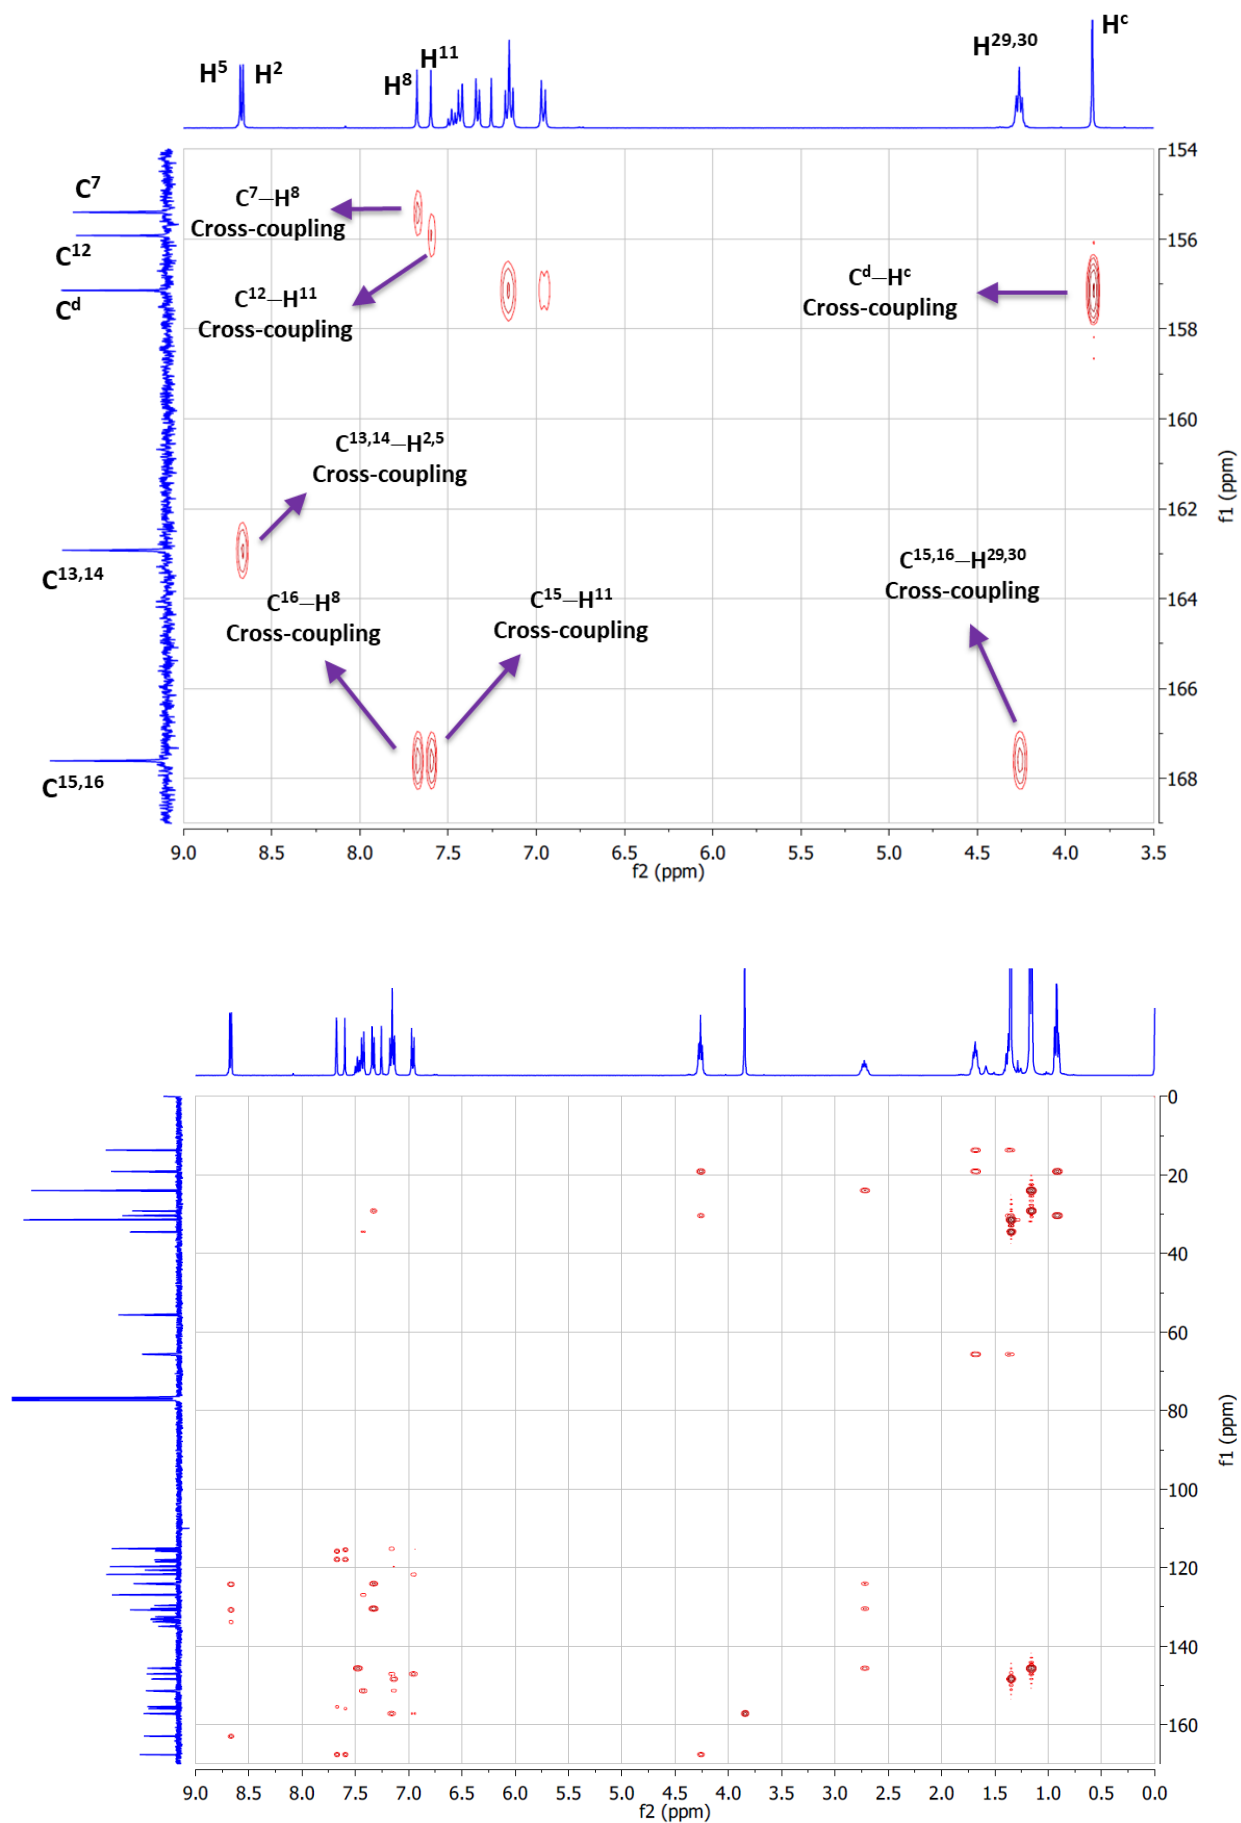

**Figure S-3.18:**  $^1\text{H}$ - $^{13}\text{C}$  gHMBC NMR spectrum ( $\text{CDCl}_3$ , 400 MHz) of compound **6** with the indication of important long-range cross-couplings between proton and carbon atoms (zoomed spectrum at the top and full spectrum at the bottom).

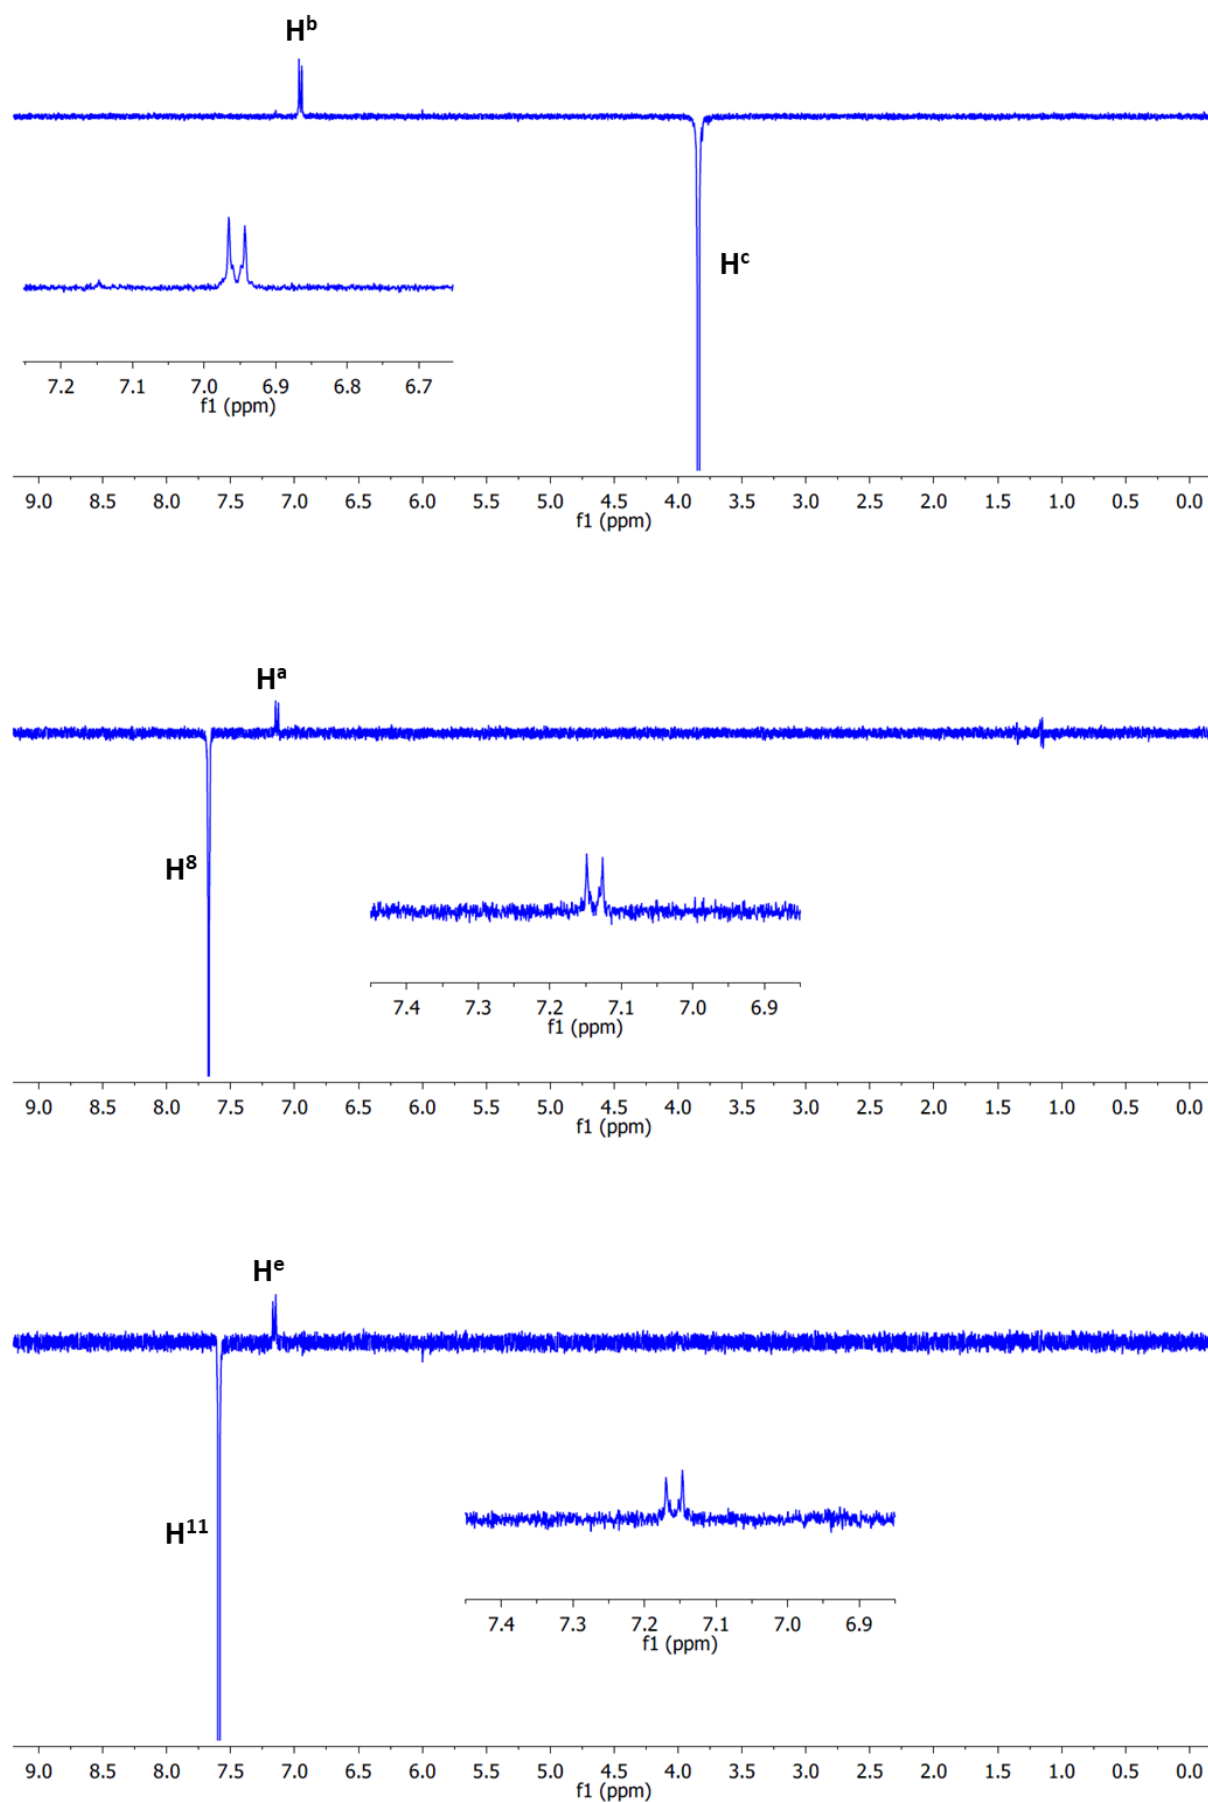

**Figure S-3.19:** <sup>1</sup>H–<sup>1</sup>H 1D NOESY NMR spectra (CDCl<sub>3</sub>, 400 MHz) of compound **6** with the indication of through-space cross-couplings between crucial protons (H<sup>c</sup>–H<sup>b</sup> coupling at the top, H<sup>a</sup>–H<sup>8</sup> coupling at the middle, and H<sup>e</sup>–H<sup>11</sup> coupling at the bottom).

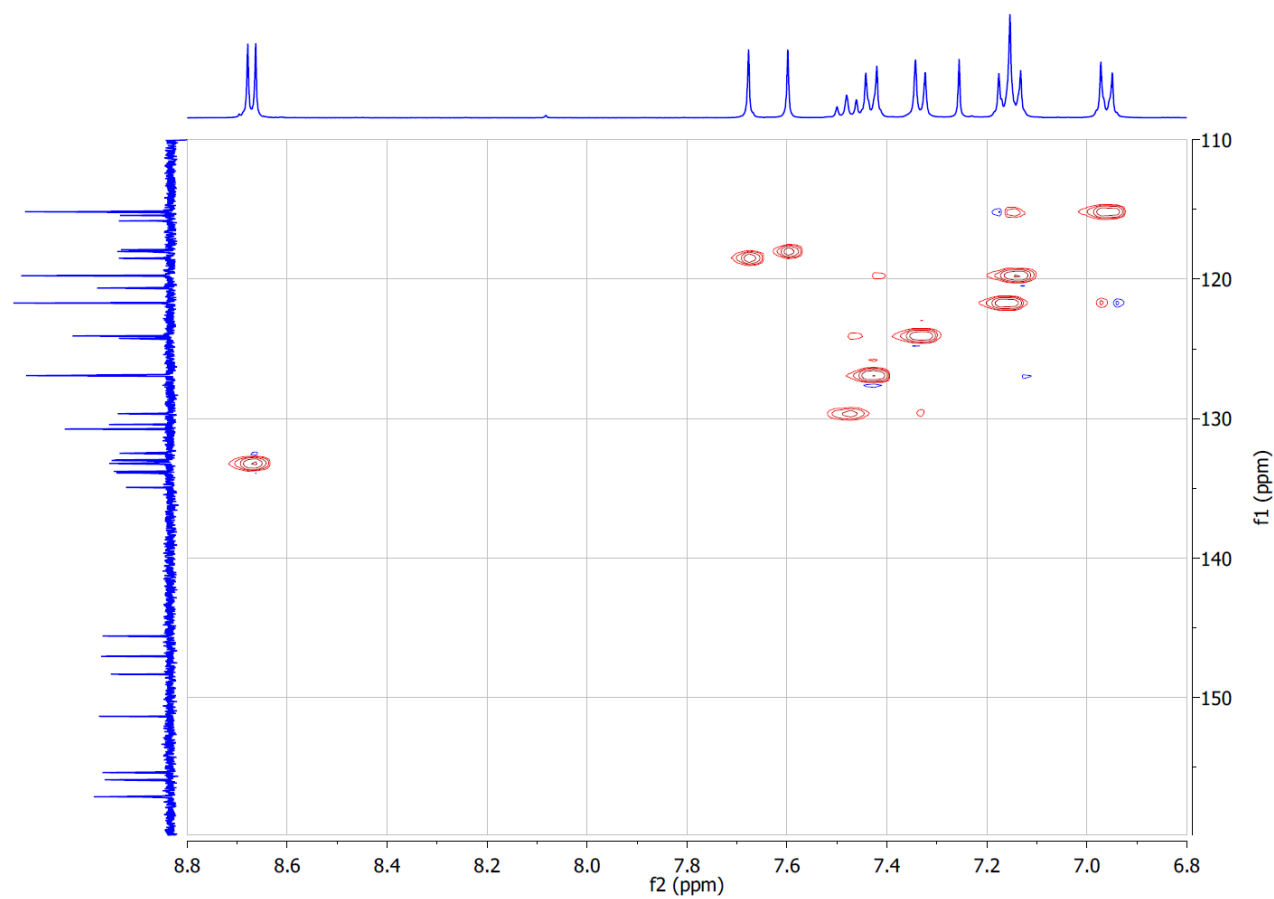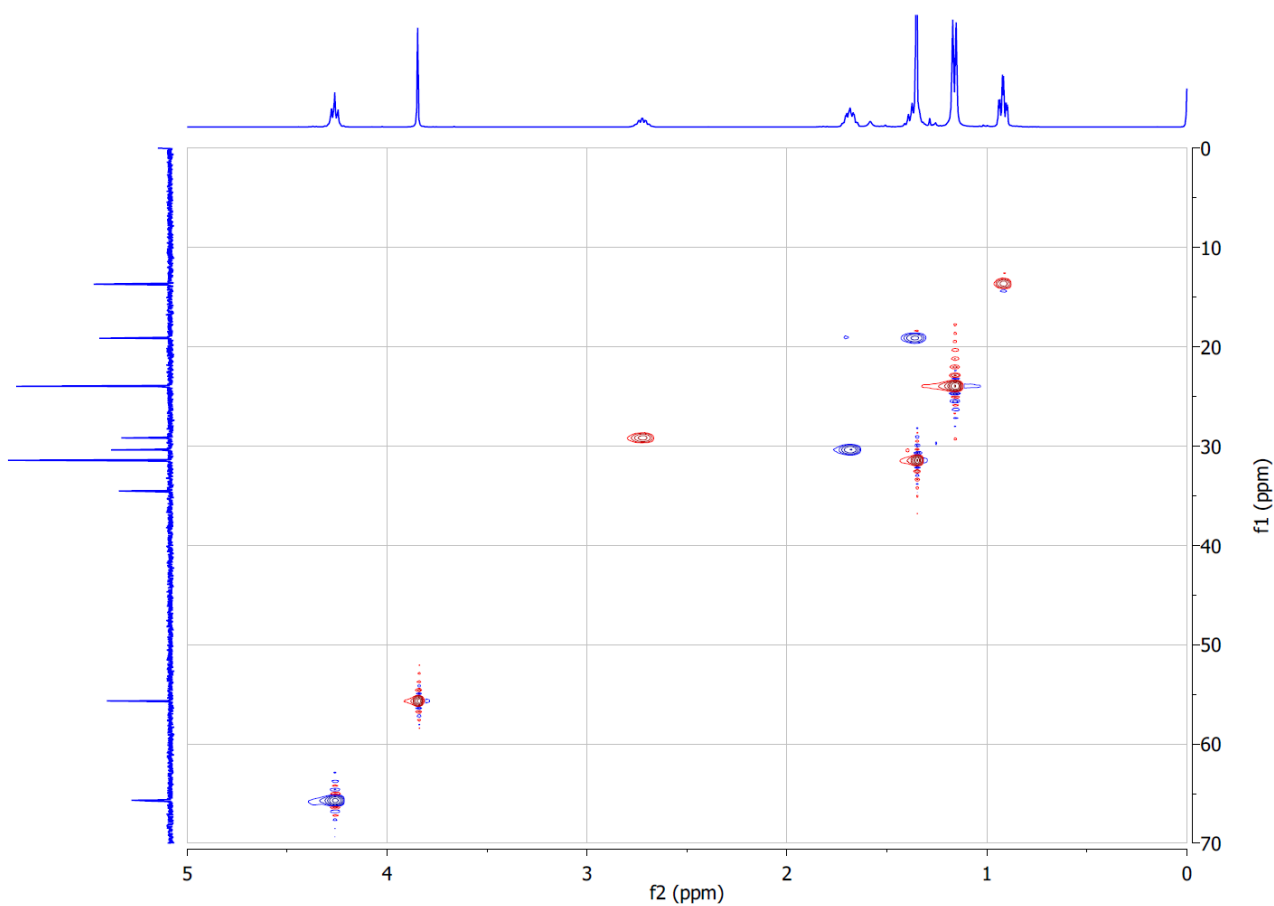

**Figure S-3.20:**  $^1\text{H}$ - $^{13}\text{C}$  HSQC NMR spectrum ( $\text{CDCl}_3$ , 400 MHz) of compound **6** (Aromatic part at the top and aliphatic part at the bottom).

### 3.5 Compound 9:

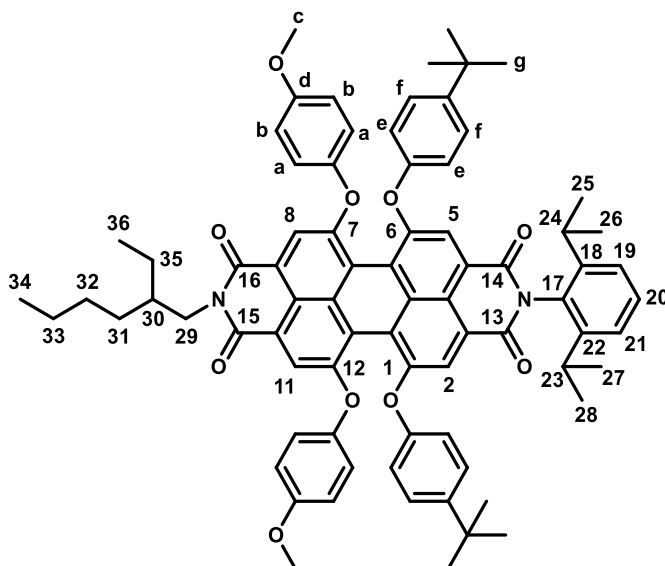

The structure of compound **9** was unambiguously confirmed by a series of systematic 1D and 2D-NMR measurements, namely  $^1\text{H}$ ,  $^{13}\text{C}$ ,  $^{13}\text{C}$ -APT and DEPT-135,  $^1\text{H}$ - $^1\text{H}$  COSY,  $^1\text{H}$ - $^{13}\text{C}$  HSQC,  $^1\text{H}$ - $^{13}\text{C}$  HMBC, and  $^1\text{H}$ - $^1\text{H}$  NOESY. The complete assignment of peaks in the  $^1\text{H}$ -NMR spectrum is shown in Figure S-3.21. The signals of all through-bond coupled protons were identified using  $^1\text{H}$ - $^1\text{H}$  COSY spectrum (Figure S-3.22). The first evidences of presence of 4-methoxyphenoxy-groups at 7, 12-positions and 4-*tert*-butylphenoxy-groups at 1, 6-positions were provided by the  $^1\text{H}$ - $^{13}\text{C}$  HMBC experiment (Figure S-3.23). This clearly showed the cross couplings of carbonyl carbons ( $\text{C}^{15}$  and  $\text{C}^{16}$ ) with perylene core protons ( $\text{H}^8$  and  $\text{H}^{11}$ ) and 2-ethylhexyl-chain protons  $\text{H}^{29}$ . Furthermore, the other set of carbonyl carbons  $\text{C}^{13}$  and  $\text{C}^{14}$  exhibited the cross couplings with perylene core protons  $\text{H}^2$  and  $\text{H}^5$ . The crucial and final confirmation to the proposed structural assignment was provided by 1D  $^1\text{H}$ - $^1\text{H}$  NOESY experiments in which through-space cross couplings between important protons were investigated. These experiments further confirmed the presence of 4-*tert*-butylphenoxy-group at 1, 6-positions by clearly showing through-space cross couplings between  $\text{H}^g$ - $\text{H}^f$ ,  $\text{H}^e$ - $\text{H}^{2,5}$ , and  $\text{H}^{23,24}$ - $\text{H}^{2,5}$  protons (Figure S-3.24). Similarly, the presence of 4-methoxyphenoxy-group at 7, 12-positions was proved by through-space cross couplings between  $\text{H}^c$ - $\text{H}^b$  and  $\text{H}^a$ - $\text{H}^{8,11}$  protons (Figure S-3.25). The identification of all proton-attached carbon atoms was achieved by  $^1\text{H}$ - $^{13}\text{C}$  HSQC spectroscopy (Figure S-3.26).



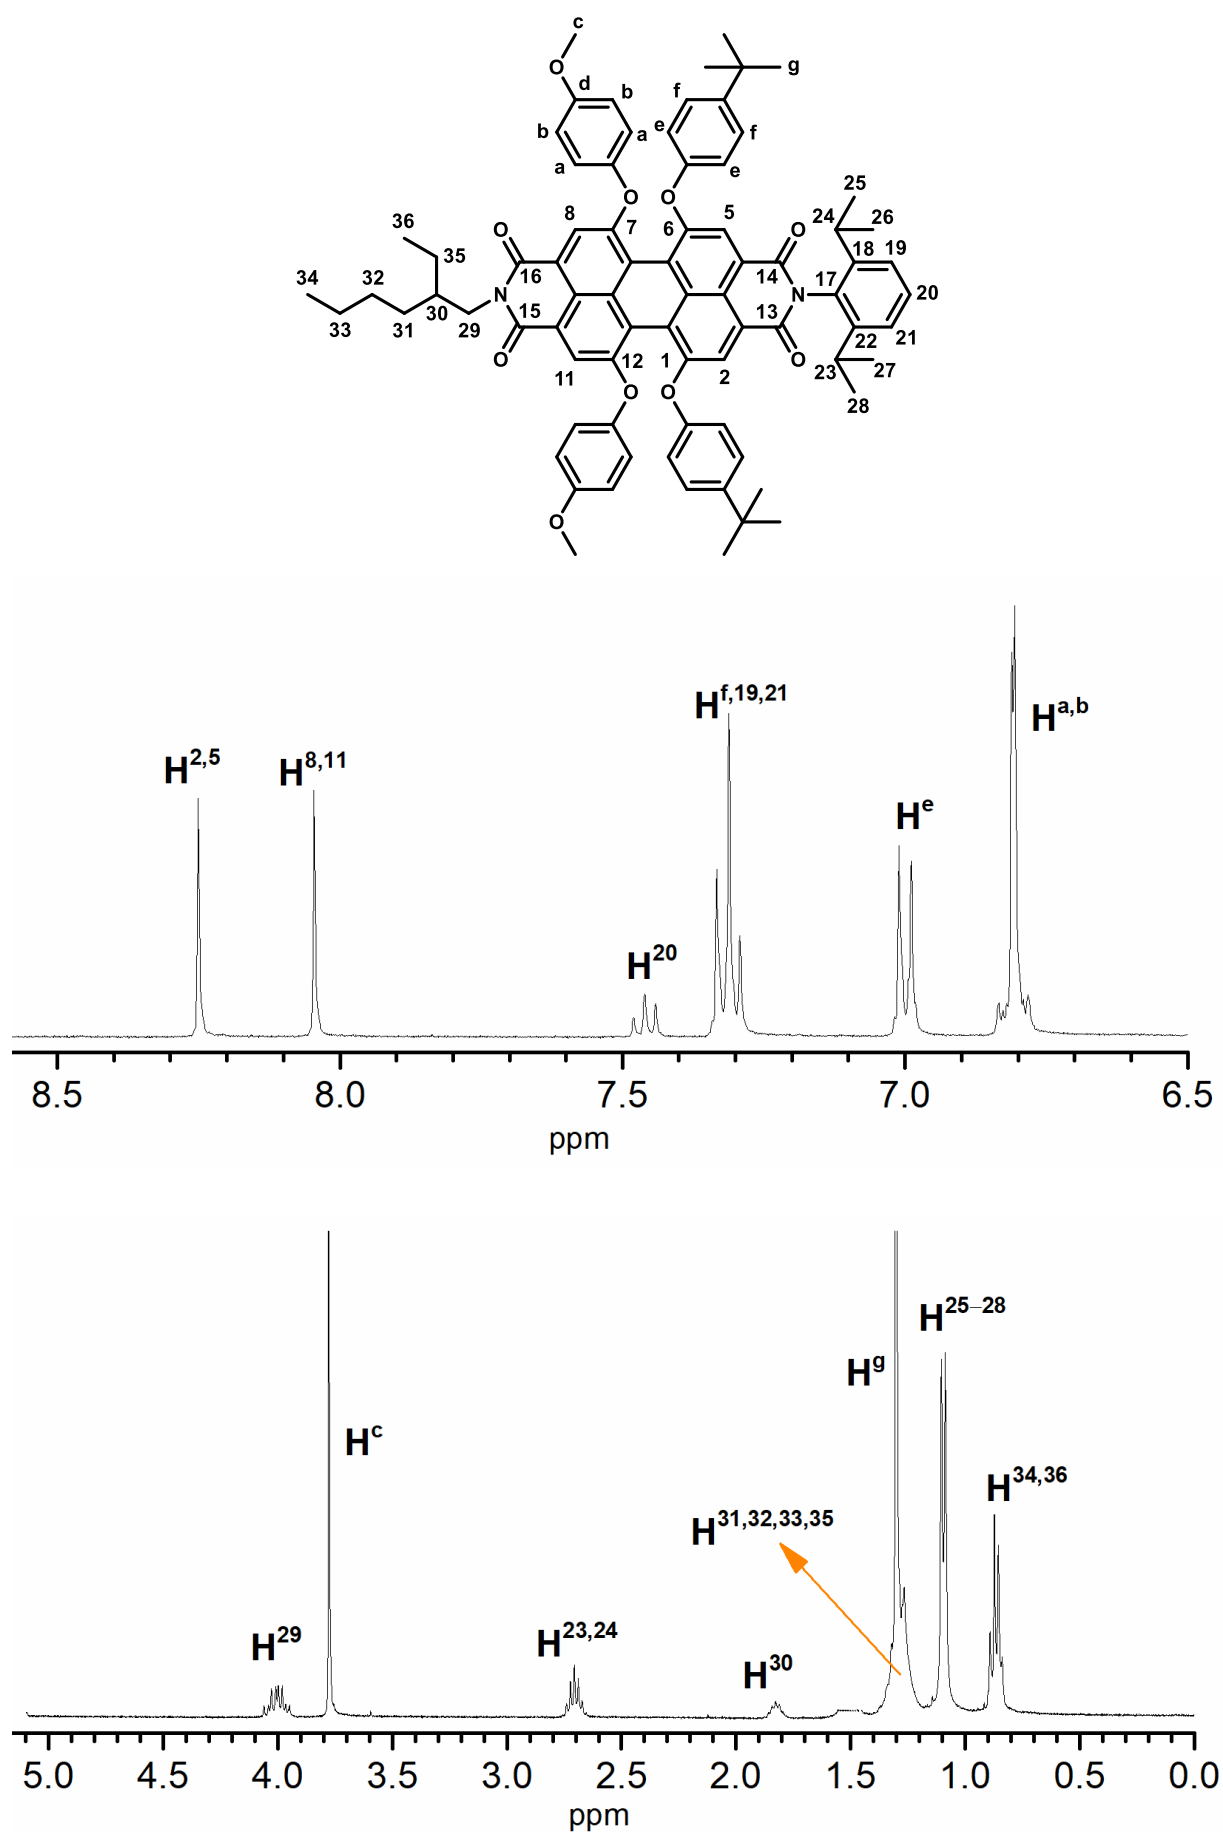

**Figure S-3.21:**  $^1\text{H}$  NMR spectrum (CD $_2$ Cl $_2$ , 400 MHz) of compound **9** with complete assignments of proton signals.

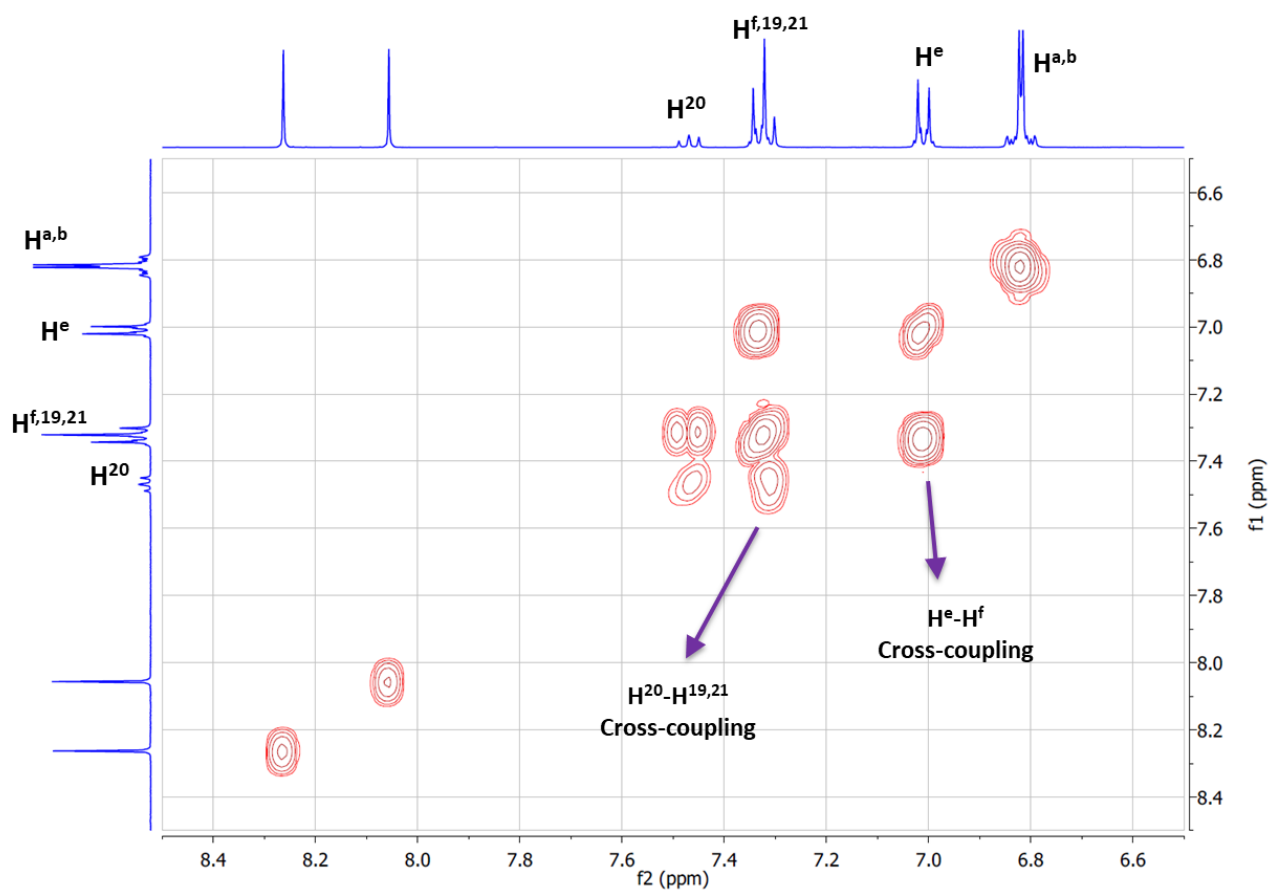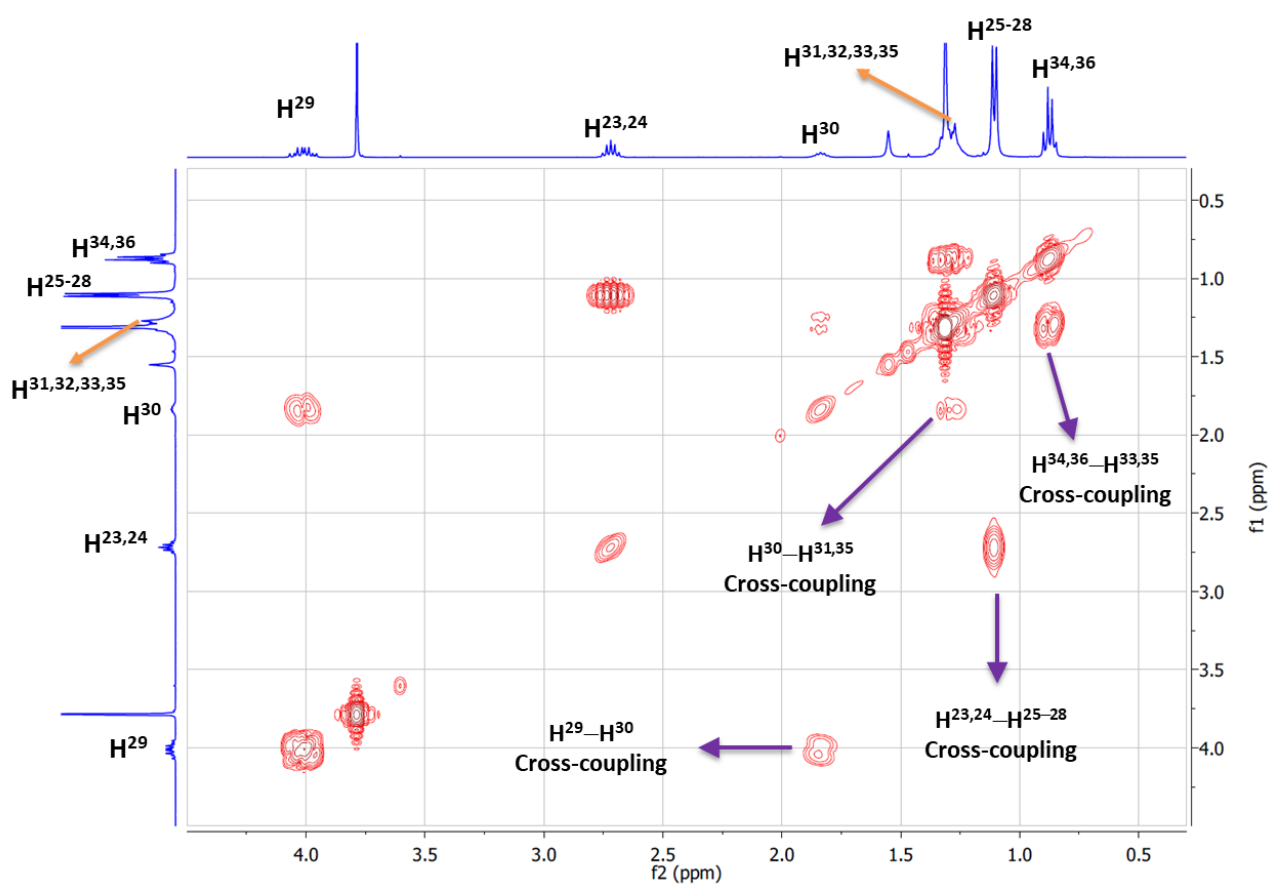

**Figure S-3.22:**  $^1\text{H}-^1\text{H}$  gCOSY NMR spectrum ( $\text{CD}_2\text{Cl}_2$ , 400 MHz) of compound **9** with the indication of through-bond coupled protons (aromatic region at the top and aliphatic region at the bottom).

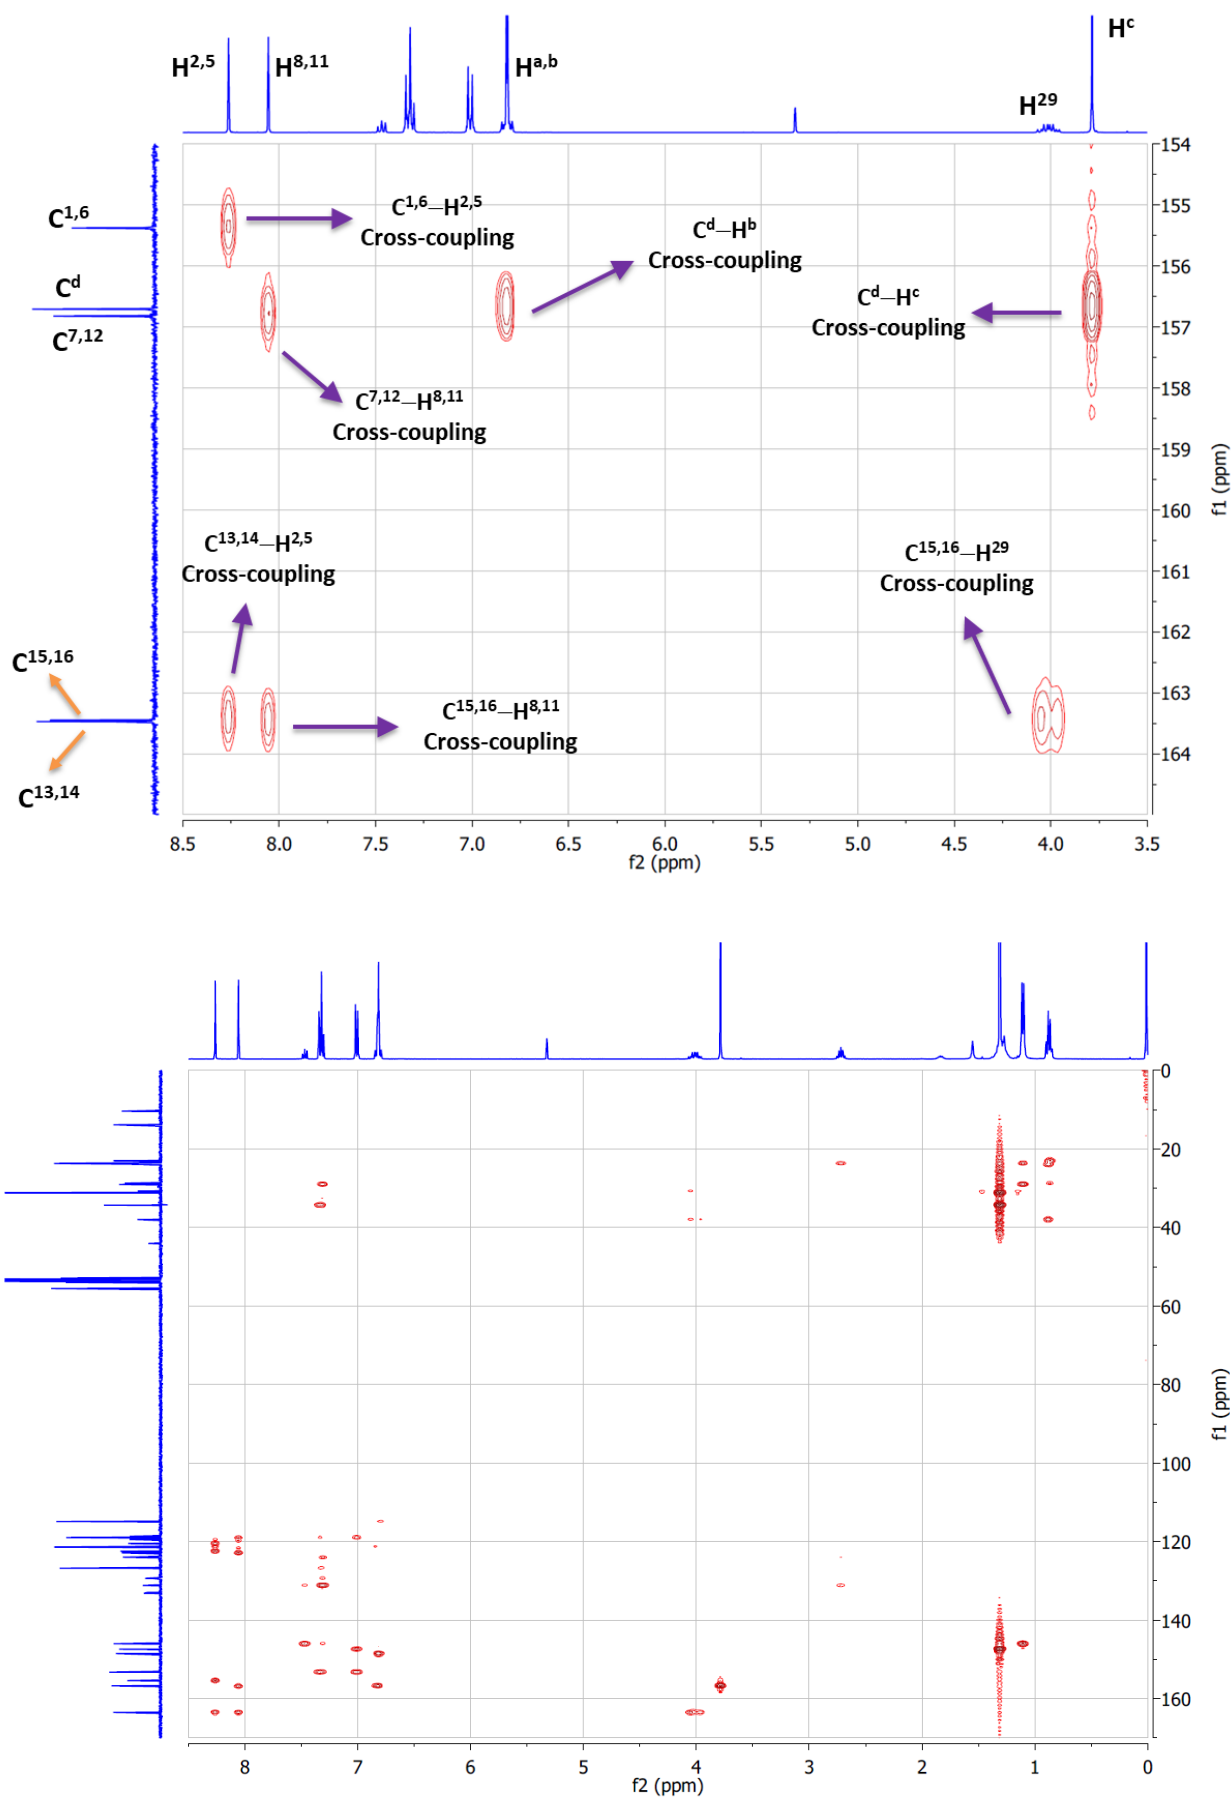

**Figure S-3.23:**  $^1\text{H}$ - $^{13}\text{C}$  gHMBC NMR spectrum ( $\text{CD}_2\text{Cl}_2$ , 400 MHz) of compound **9** with the indication of important long-range cross-couplings between proton and carbon atoms (zoomed spectrum at the top and full spectrum at the bottom).

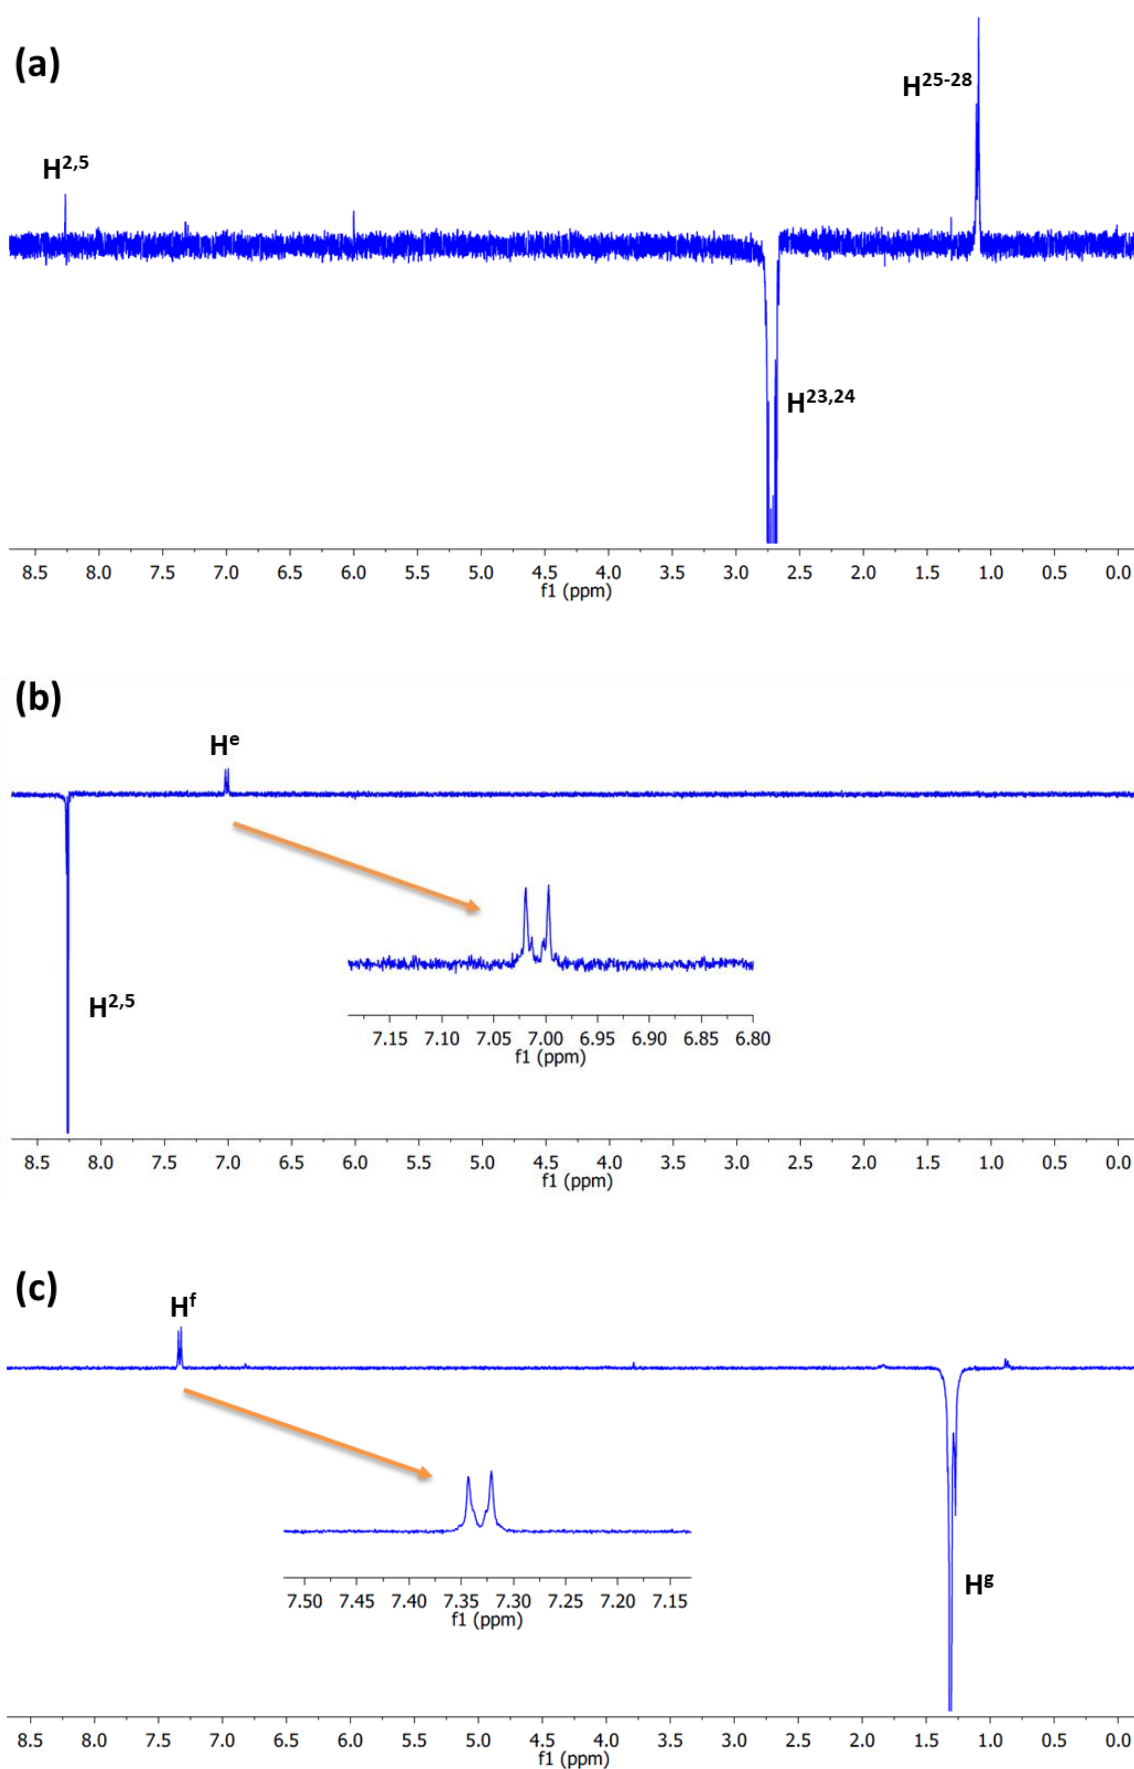

**Figure S-3.24:**  $^1\text{H}$ - $^1\text{H}$  1D NOESY NMR spectra ( $\text{CD}_2\text{Cl}_2$ , 400 MHz) of compound **9** with the indication of through-space cross-couplings between crucial protons: (a)  $\text{H}^{23,24}$ - $\text{H}^{2,5}$  coupling; (b)  $\text{H}^{2,5}$ - $\text{H}^e$  coupling; (c)  $\text{H}^g$ - $\text{H}^f$  coupling.

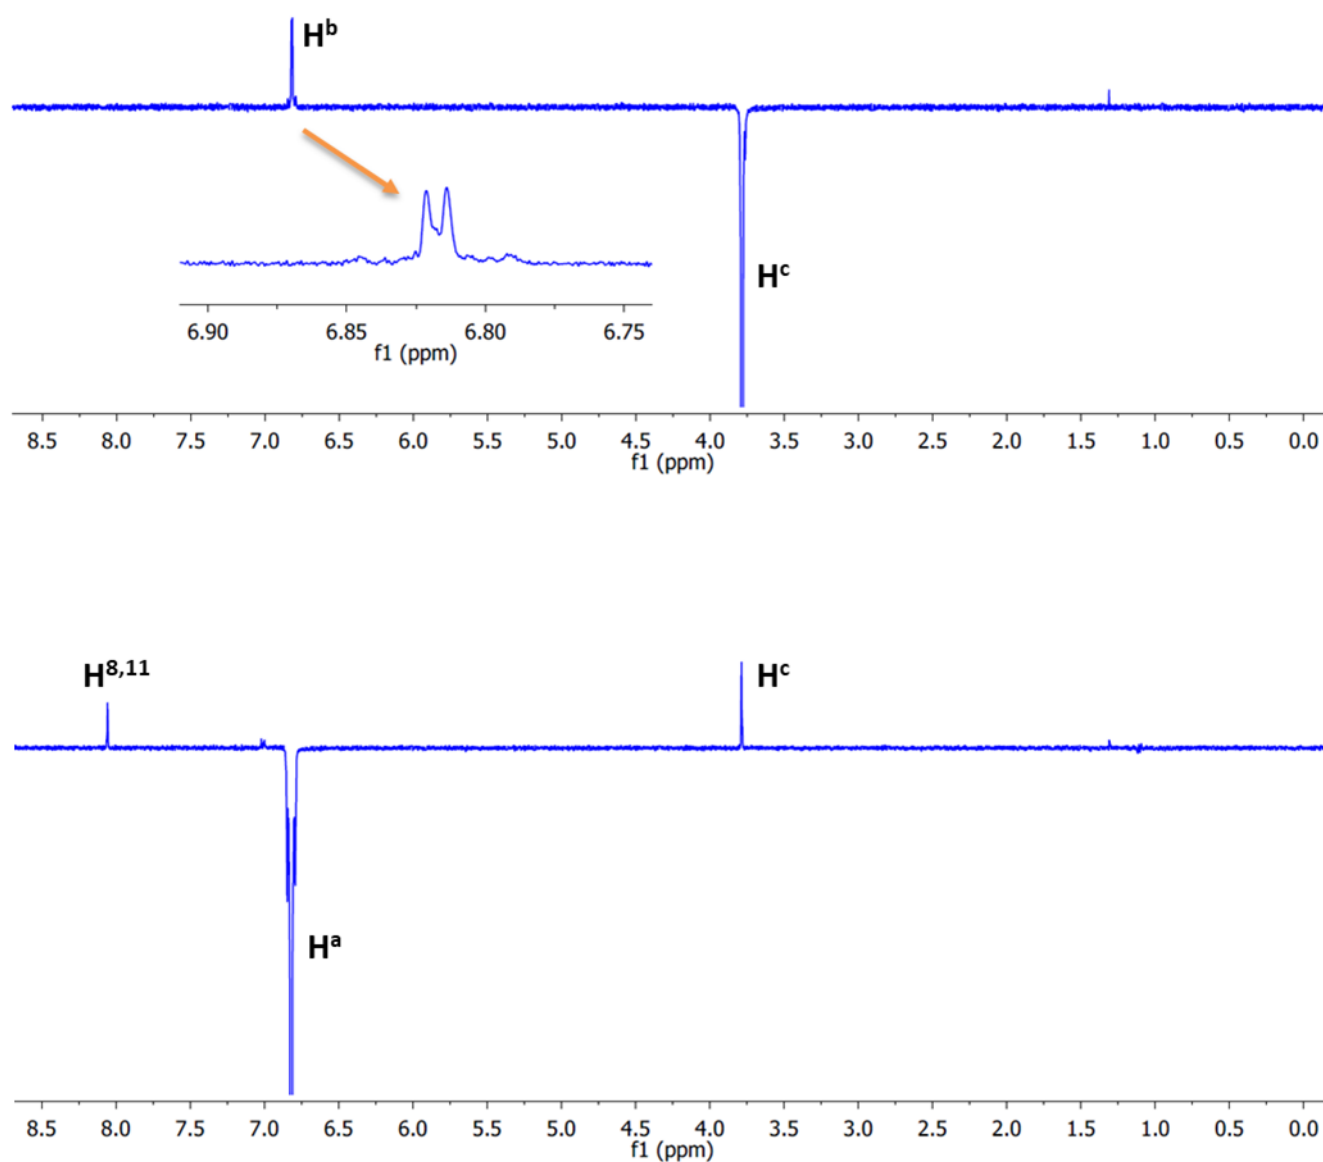

**Figure S-3.25:**  $^1\text{H}$ - $^1\text{H}$  1D NOESY NMR spectra ( $\text{CD}_2\text{Cl}_2$ , 400 MHz) of compound **9** with the indication of through-space cross-couplings between crucial protons ( $\text{H}^c$ - $\text{H}^b$  coupling at the top and  $\text{H}^a$ - $\text{H}^{8,11}$  coupling at the bottom).

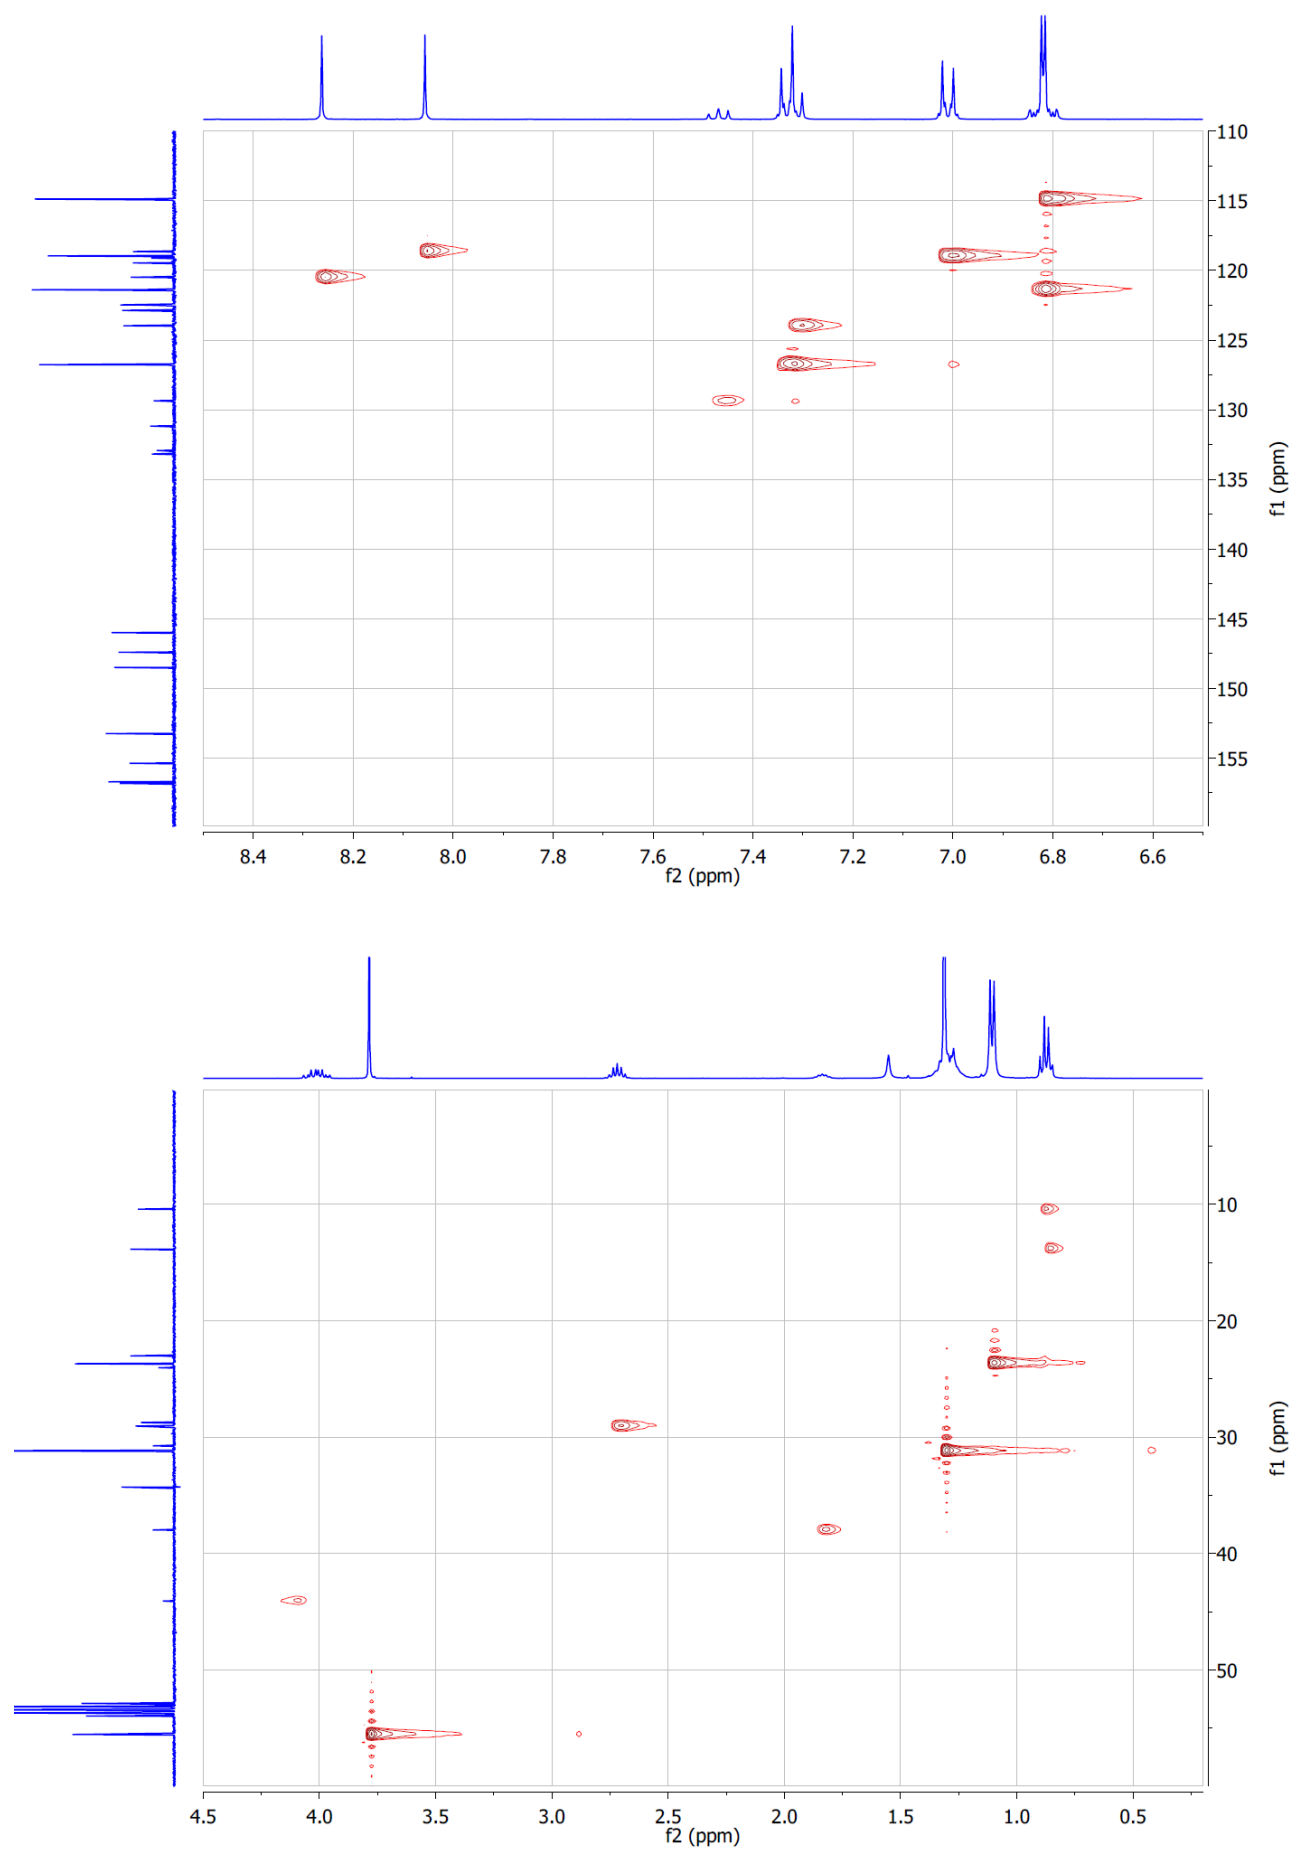

**Figure S-3.26:**  $^1\text{H}$ - $^{13}\text{C}$  HSQC NMR spectrum ( $\text{CD}_2\text{Cl}_2$ , 400 MHz) of compound **9** (Aromatic part at the top and aliphatic part at the bottom).

### 3.6 Compound 12:

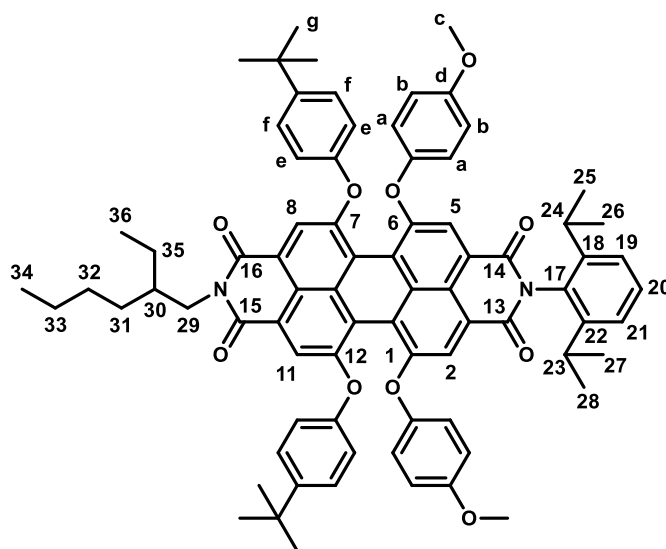

The structure of compound **12** was unambiguously confirmed by a series of systematic 1D and 2D-NMR measurements, namely  $^1\text{H}$ ,  $^{13}\text{C}$ ,  $^{13}\text{C}$ -APT and DEPT-135,  $^1\text{H}$ - $^1\text{H}$  COSY,  $^1\text{H}$ - $^{13}\text{C}$  HSQC,  $^1\text{H}$ - $^{13}\text{C}$  HMBC, and  $^1\text{H}$ - $^1\text{H}$  NOESY. The complete assignment of peaks in the  $^1\text{H}$ -NMR spectrum is shown in Figure S-3.27. The signals of all through-bond coupled protons were identified using  $^1\text{H}$ - $^1\text{H}$  COSY spectrum (Figure S-3.28). The first evidences of presence of 4-*tert*-butylphenoxy-groups at 7, 12-positions and 4-methoxyphenoxy-groups at 1, 6-positions were provided by the  $^1\text{H}$ - $^{13}\text{C}$  HMBC experiment (Figure S-3.29). This clearly showed the cross couplings of carbonyl carbons ( $\text{C}^{15}$  and  $\text{C}^{16}$ ) with perylene core protons ( $\text{H}^8$  and  $\text{H}^{11}$ ) and 2-ethylhexyl-chain protons  $\text{H}^{29}$ . Furthermore, the other set of carbonyl carbons  $\text{C}^{13}$  and  $\text{C}^{14}$  exhibited the cross couplings with perylene core protons  $\text{H}^2$  and  $\text{H}^5$ . The crucial and final confirmation to the proposed structural assignment was provided by 1D  $^1\text{H}$ - $^1\text{H}$  NOESY experiments in which through-space cross couplings between important protons were investigated (Figures S-3.30 & S-3.31). These experiments further confirmed the presence of 4-*tert*-butylphenoxy-group at 7, 12-positions by clearly showing through-space cross couplings between  $\text{H}^g$ - $\text{H}^f$ , and  $\text{H}^e$ - $\text{H}^{8,11}$  protons (Figure S-3.30). The identification of all proton-attached carbon atoms was achieved by  $^1\text{H}$ - $^{13}\text{C}$  HSQC spectroscopy (Figure S-3.32).

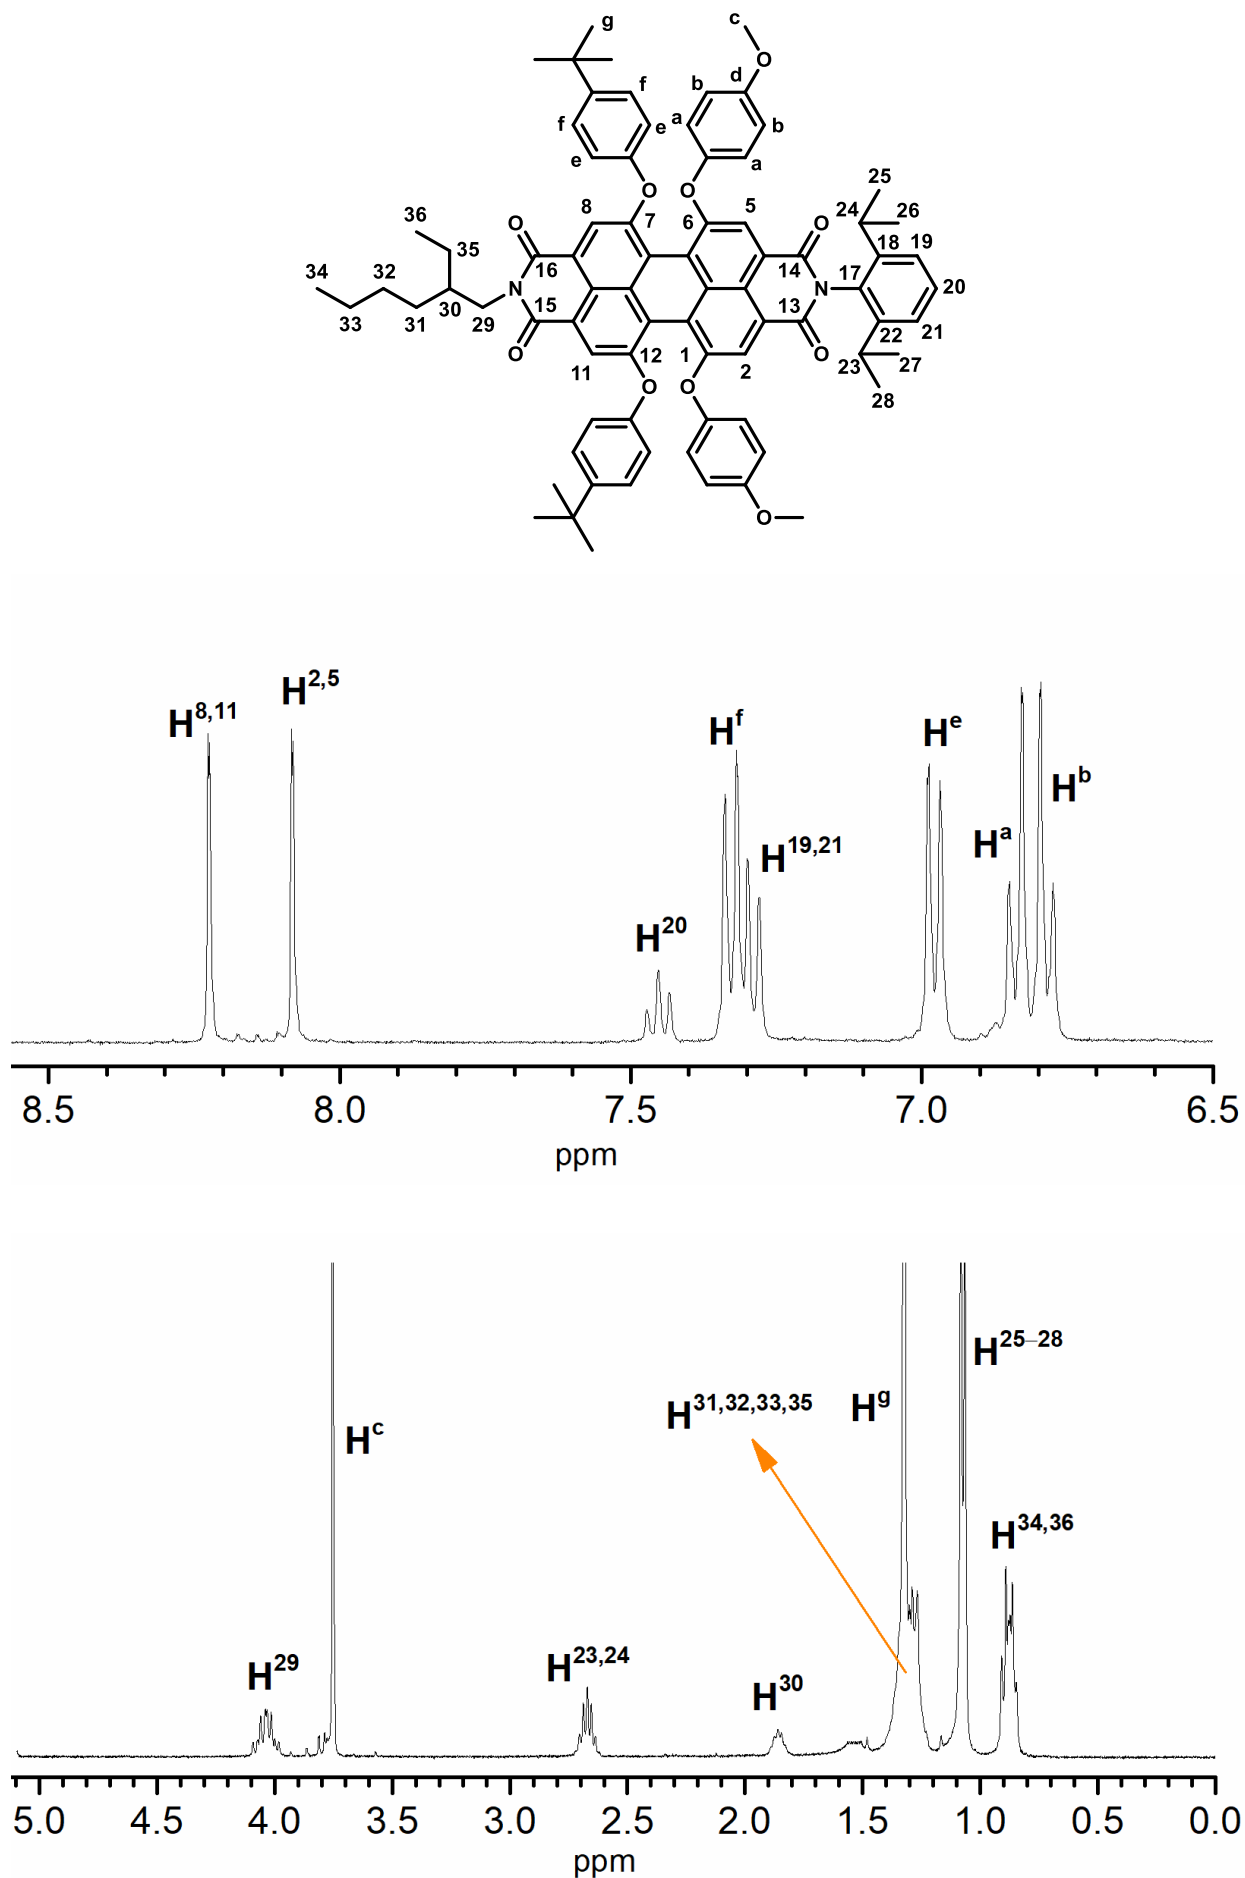

**Figure S-3.27:**  $^1\text{H}$  NMR spectrum (CD $_2$ Cl $_2$ , 400 MHz) of compound **12** with complete assignments of proton signals.



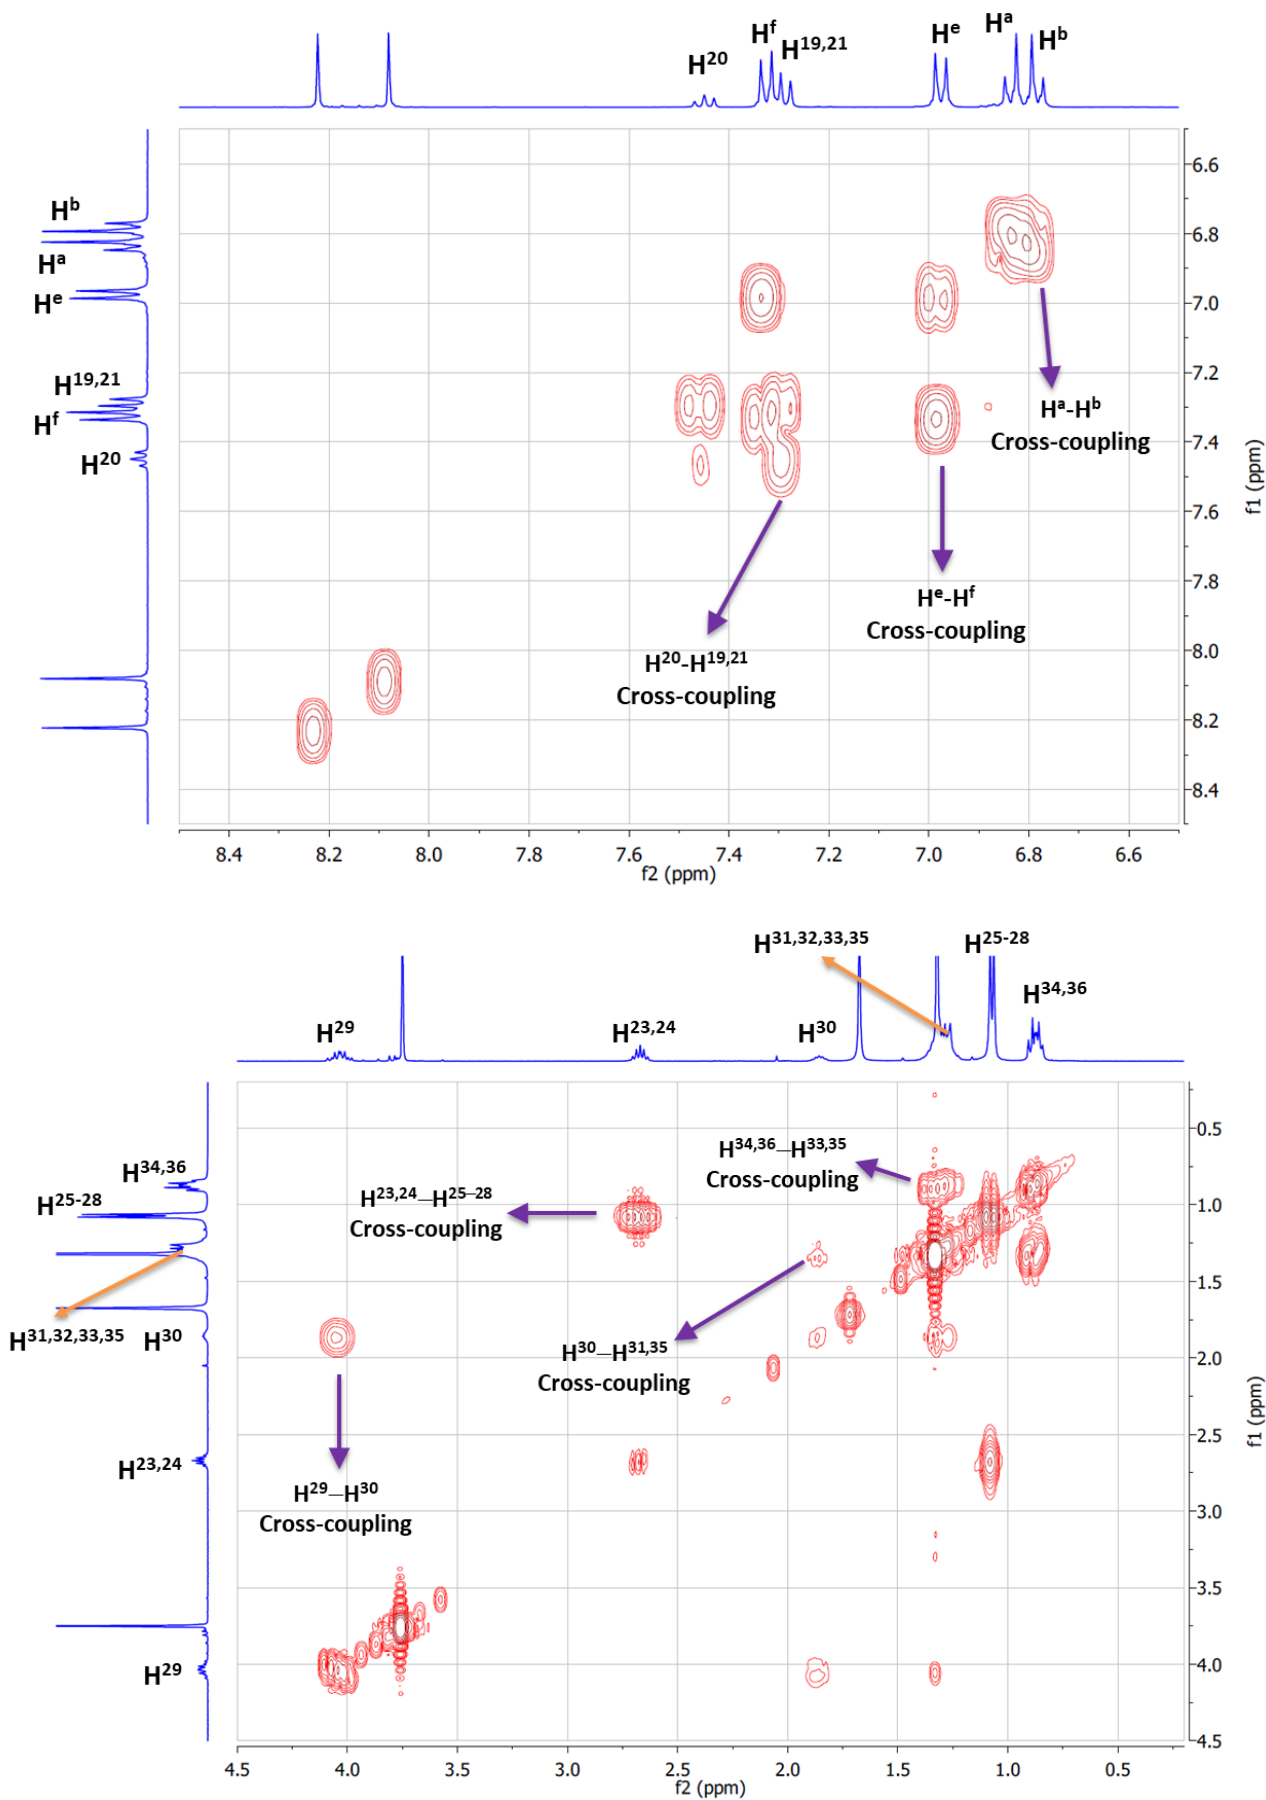

**Figure S-3.28:**  $^1\text{H}$ - $^1\text{H}$  gCOSY NMR spectrum ( $\text{CD}_2\text{Cl}_2$ , 400 MHz) of compound **12** with the indication of through-bond coupled protons (aromatic region at the top and aliphatic region at the bottom).

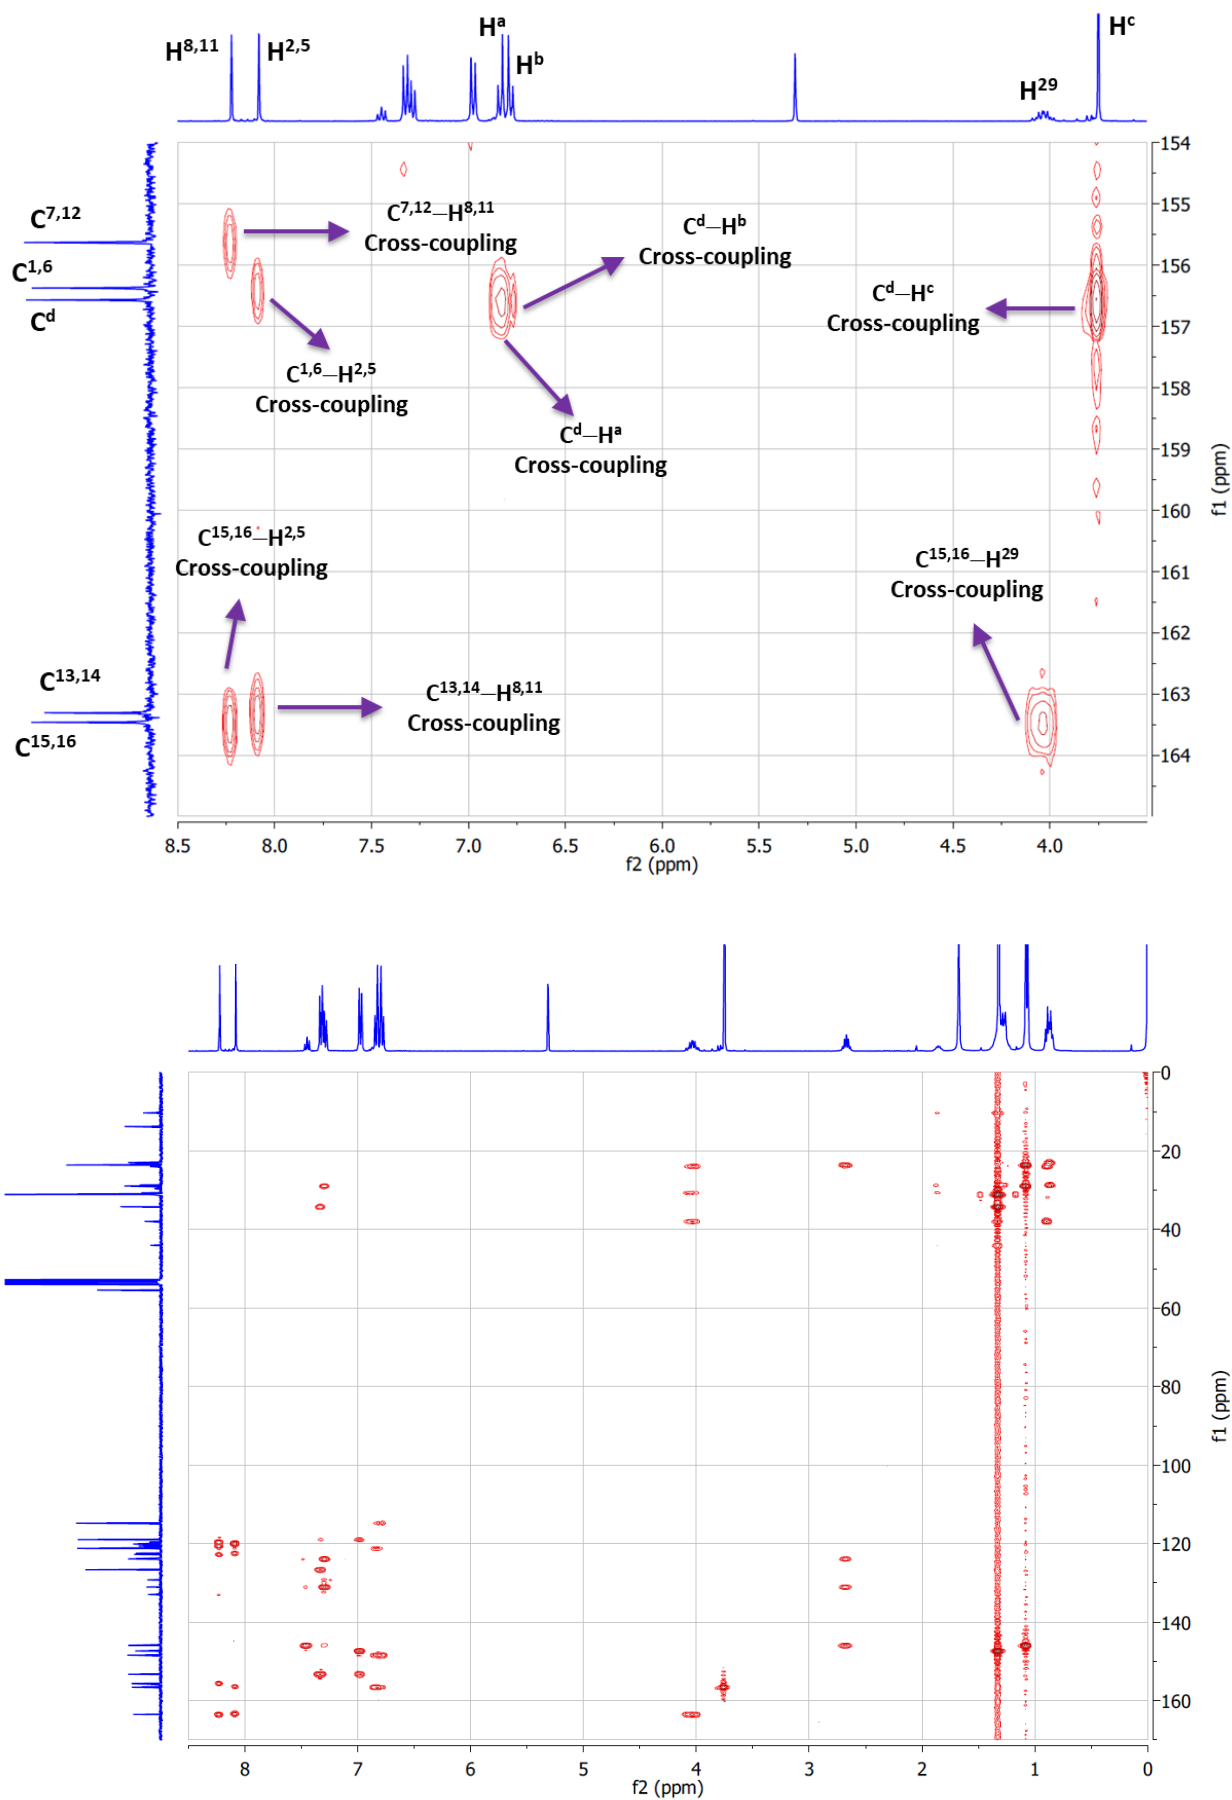

**Figure S-3.29:**  $^1\text{H}$ - $^{13}\text{C}$  gHMBC NMR spectrum ( $\text{CD}_2\text{Cl}_2$ , 400 MHz) of compound **12** with the indication of important long-range cross-couplings between proton and carbon atoms (zoomed spectrum at the top and full spectrum at the bottom).

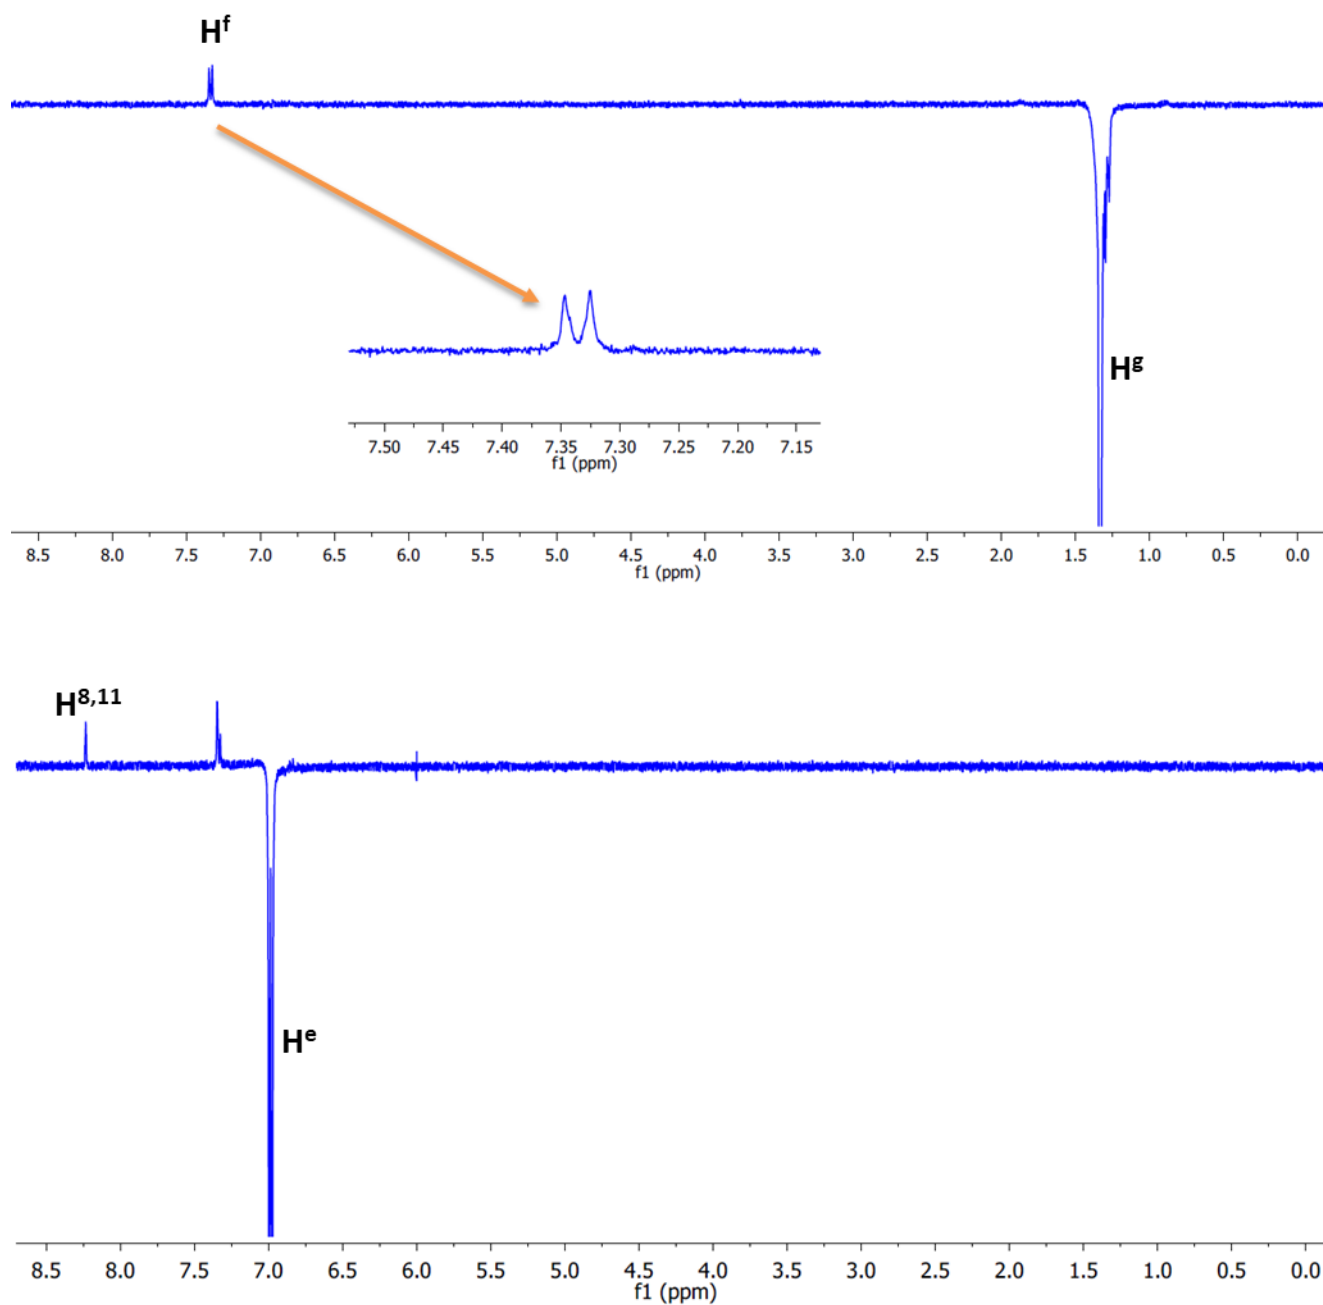

**Figure S-3.30:**  $^1\text{H}$ - $^1\text{H}$  1D NOESY NMR spectra ( $\text{CD}_2\text{Cl}_2$ , 400 MHz) of compound **12** with the indication of through-space cross-couplings between crucial protons ( $\text{H}^g$ - $\text{H}^f$  coupling at the top and  $\text{H}^e$ - $\text{H}^{8,11}$  coupling at the bottom).

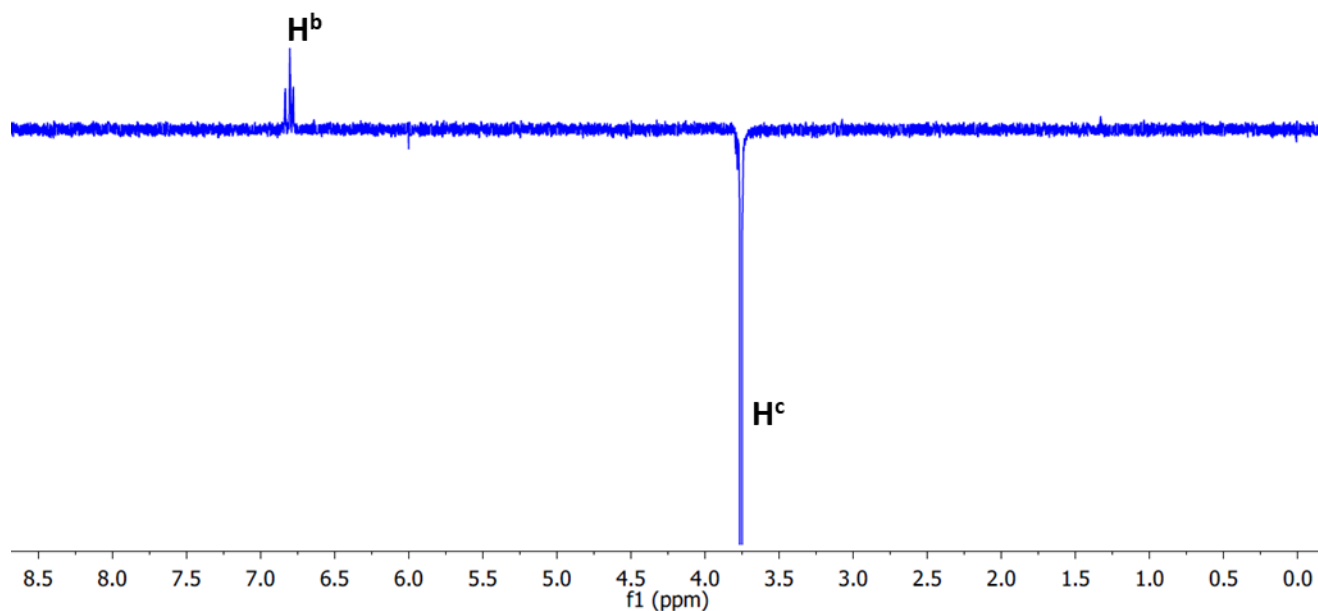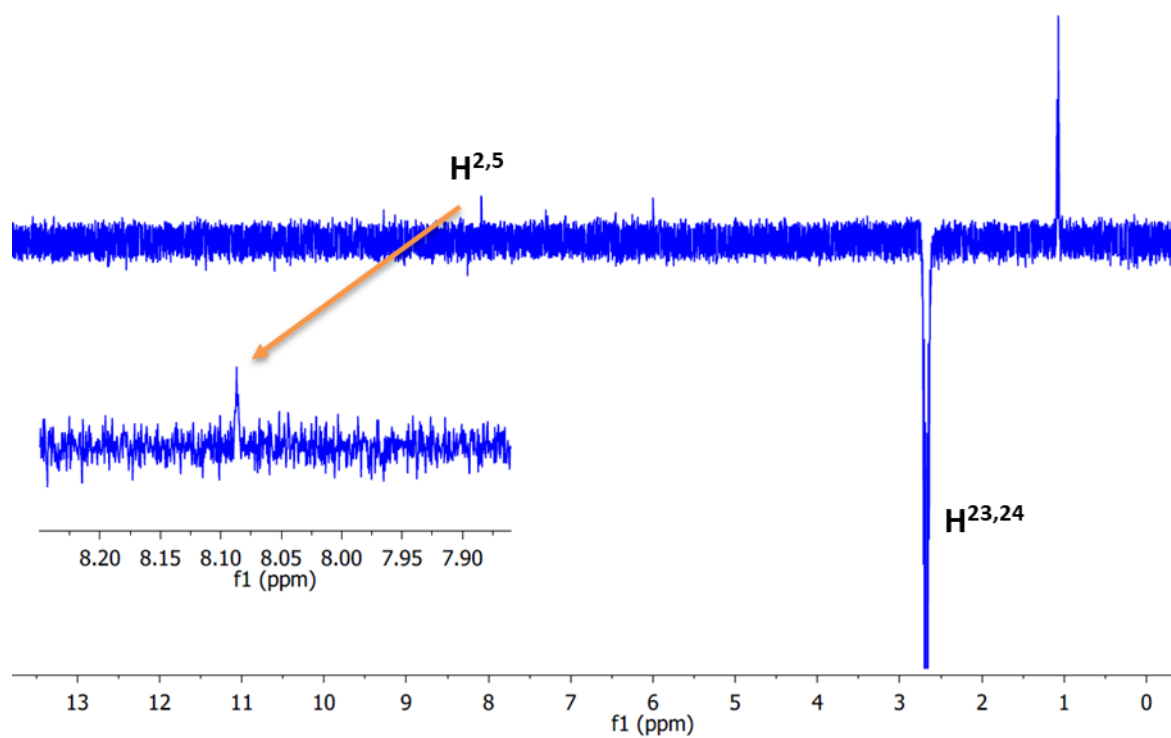

**Figure S-3.31:** <sup>1</sup>H–<sup>1</sup>H 1D NOESY NMR spectra (CD<sub>2</sub>Cl<sub>2</sub>, 400 MHz) of compound **12** with the indication of through-space cross-couplings between crucial protons (H<sup>c</sup>–H<sup>b</sup> coupling at the top and H<sup>23,24</sup>–H<sup>2,5</sup> coupling at the bottom).

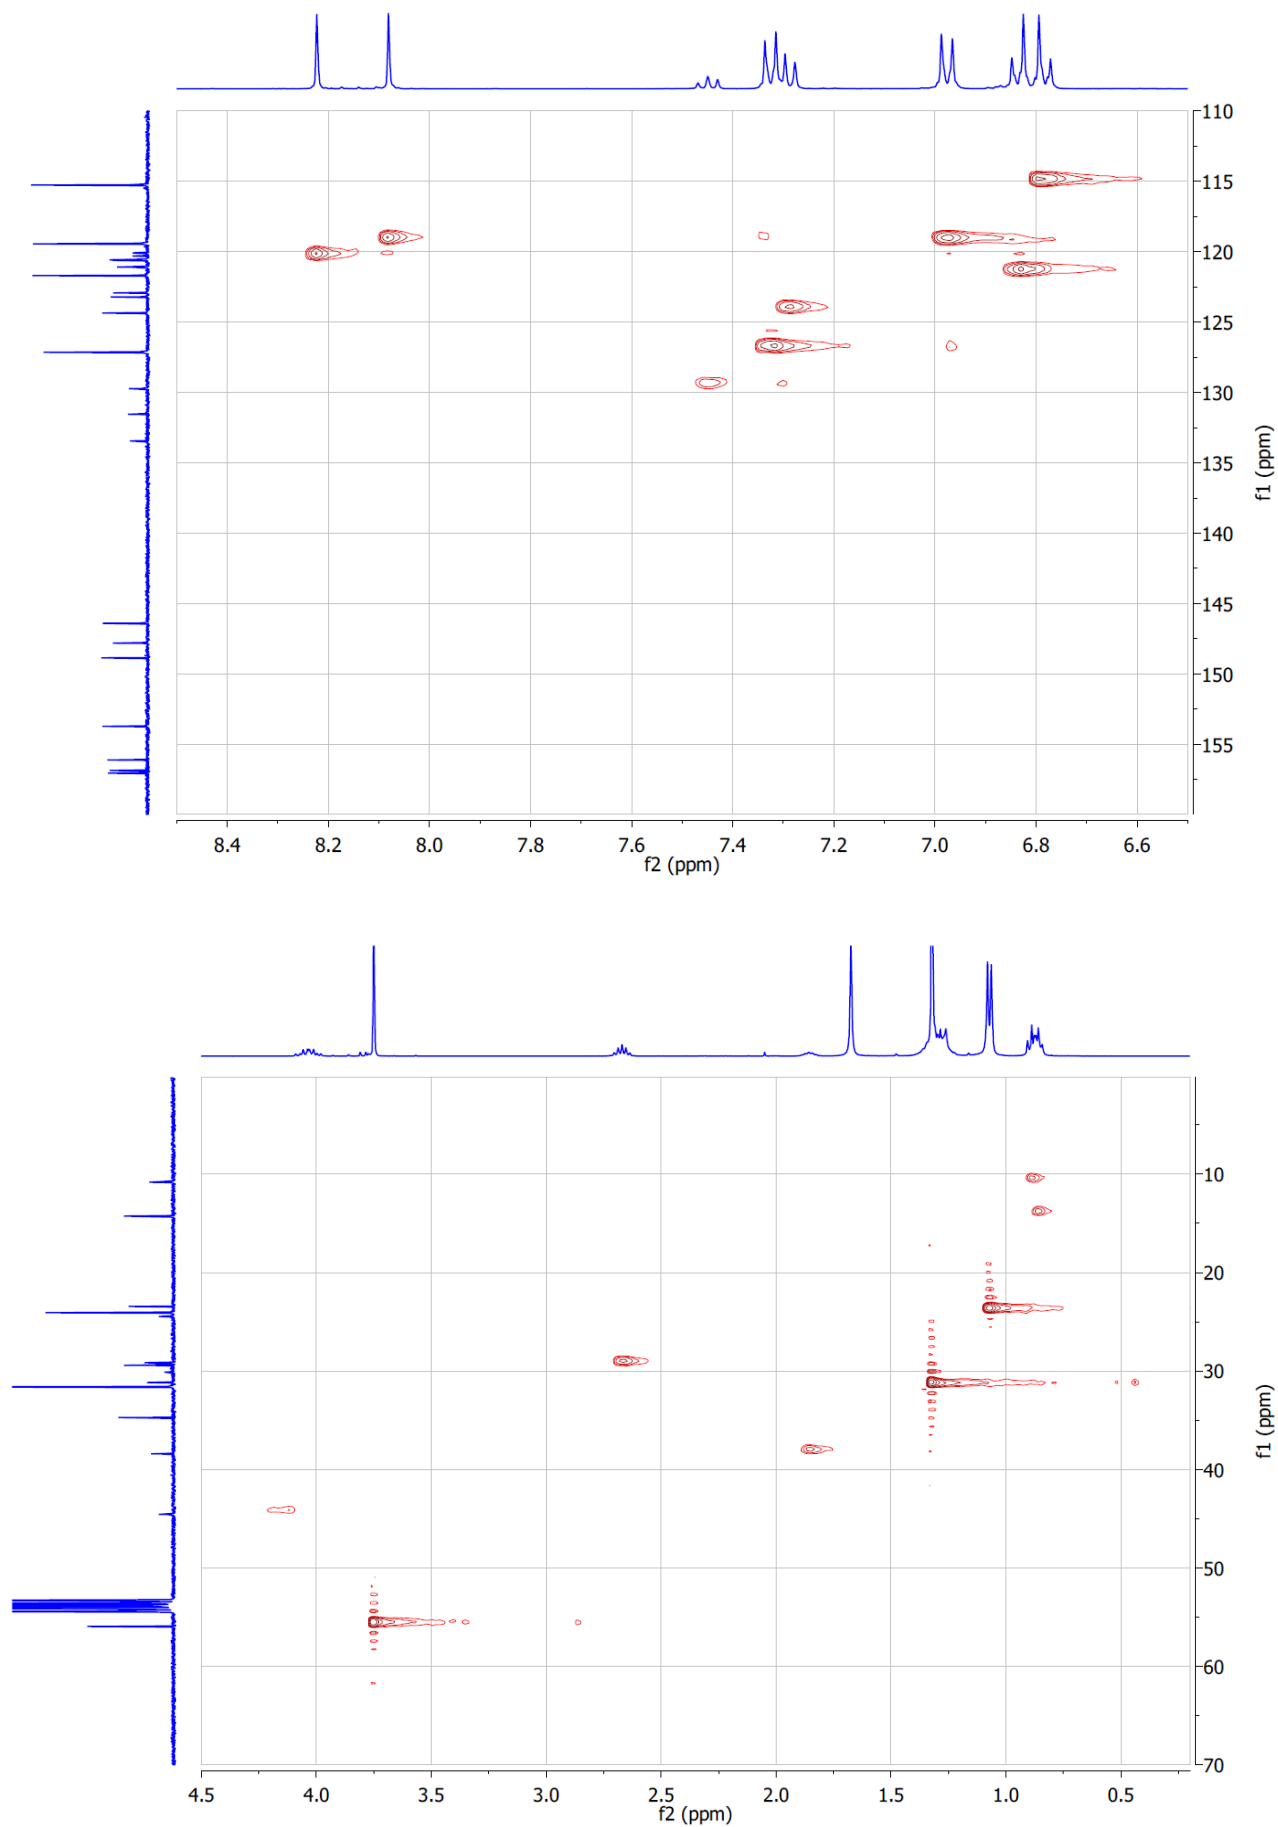

**Figure S-3.32:**  $^1\text{H}$ - $^{13}\text{C}$  gHSQC NMR spectrum ( $\text{CD}_2\text{Cl}_2$ , 400 MHz) of compound **12** (Aromatic part at the top and aliphatic part at the bottom).

### 3.7 Compound 15:

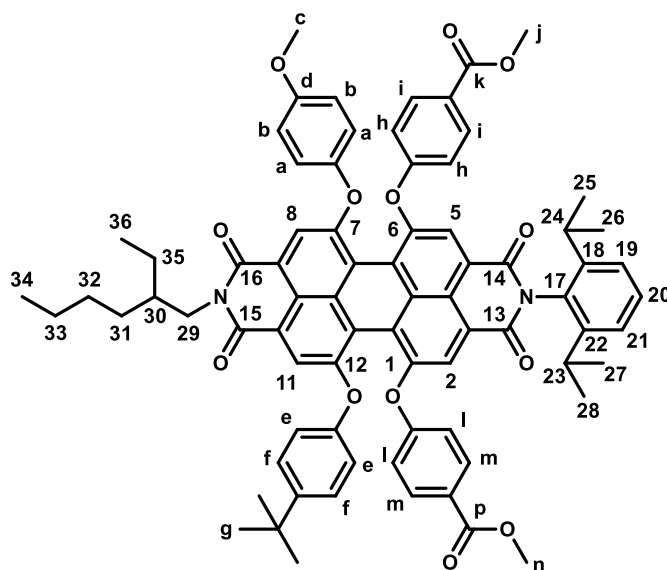

The structure of compound **15** was unambiguously confirmed by a series of systematic 1D and 2D-NMR measurements, namely  $^1\text{H}$ ,  $^{13}\text{C}$ ,  $^{13}\text{C}$ -APT and DEPT-135,  $^1\text{H}$ - $^1\text{H}$  COSY,  $^1\text{H}$ - $^{13}\text{C}$  HSQC,  $^1\text{H}$ - $^{13}\text{C}$  HMBC, and  $^1\text{H}$ - $^1\text{H}$  NOESY. The complete assignment of peaks in the  $^1\text{H}$ -NMR spectrum is shown in Figure S-3.33. The signals of all through-bond coupled protons were identified using  $^1\text{H}$ - $^1\text{H}$  COSY spectrum (Figure S-3.34). The first evidences of presence of 4-methoxyphenoxy-group at 7-position, 4-*tert*-butylphenoxy-group at 12-position, and 4-methoxycarbonylphenoxy-groups at 1, 6-positions were provided by the  $^1\text{H}$ - $^{13}\text{C}$  HMBC experiment (Figure S-3.35). This clearly showed the cross couplings of carbonyl carbon  $\text{C}^{15}$  with perylene core proton  $\text{H}^{11}$  and 2-ethylhexyl-chain protons  $\text{H}^{29}$ . Similarly, cross couplings of carbonyl carbon  $\text{C}^{16}$  with perylene core proton  $\text{H}^8$  and 2-ethylhexyl-chain protons  $\text{H}^{29}$  were observed. Furthermore, the other set of carbonyl carbons  $\text{C}^{13}$  and  $\text{C}^{14}$  exhibited the cross couplings with perylene core protons  $\text{H}^2$  and  $\text{H}^5$ . The crucial and final confirmation to the proposed structural assignment was provided by 1D  $^1\text{H}$ - $^1\text{H}$  NOESY experiments in which through-space cross couplings between important protons were investigated. These experiments further confirmed the presence of 4-methoxycarbonylphenoxy-groups at 1, 6-positions by clearly showing through-space cross coupling between  $\text{H}^{\text{h},1}$ - $\text{H}^{2,5}$  protons (Figure S-3.36). Similarly, the presence of 4-*tert*-butylphenoxy-group at 12-position was proved by through-space cross couplings between  $\text{H}^{\text{e}}$ - $\text{H}^{11}$  protons (Figure S-3.36). The identification of all proton-attached carbon atoms was achieved by  $^1\text{H}$ - $^{13}\text{C}$  HSQC spectroscopy (Figure S-3.37).

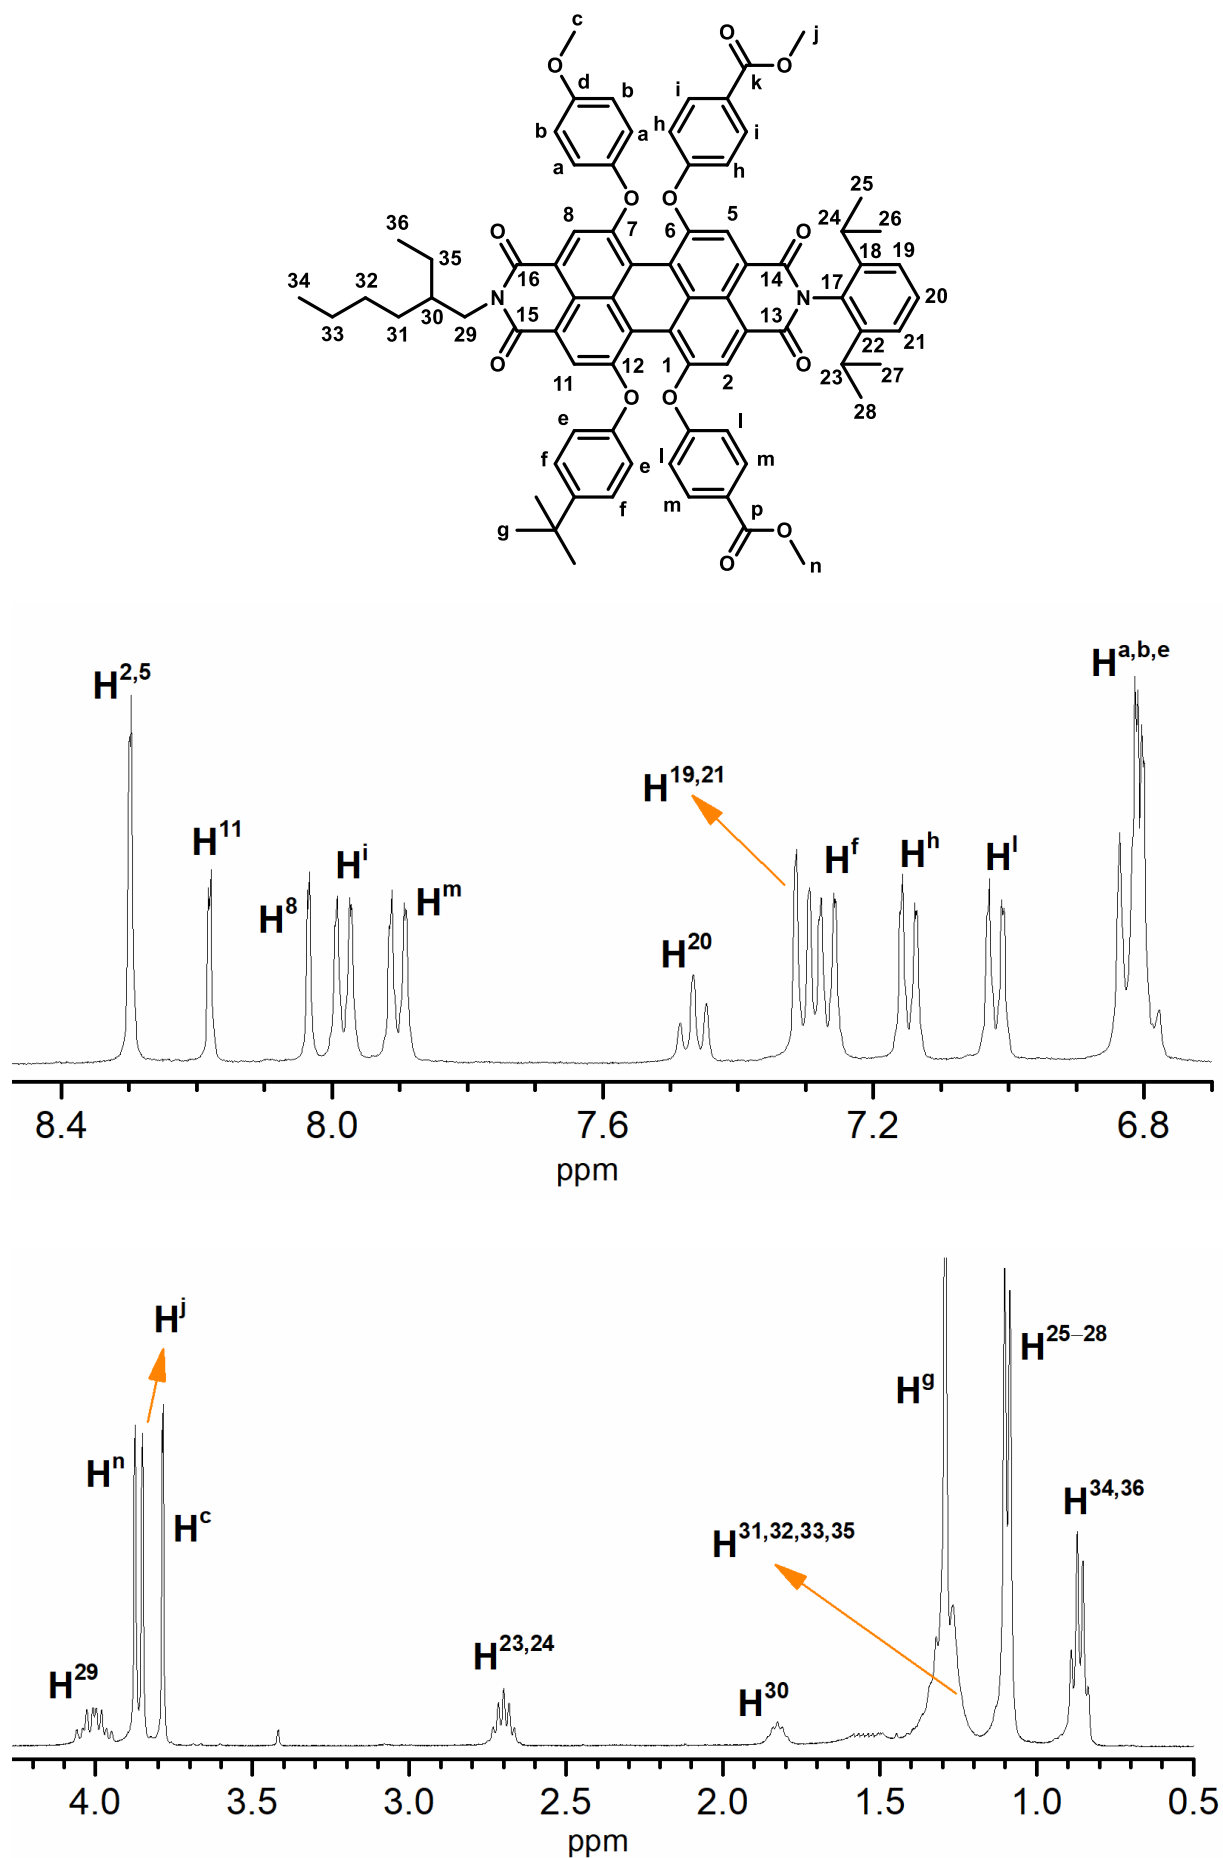

**Figure S-3.33:**  $^1\text{H}$  NMR spectrum (CD $_2$ Cl $_2$ , 400 MHz) of compound **15** with complete assignments of proton signals.

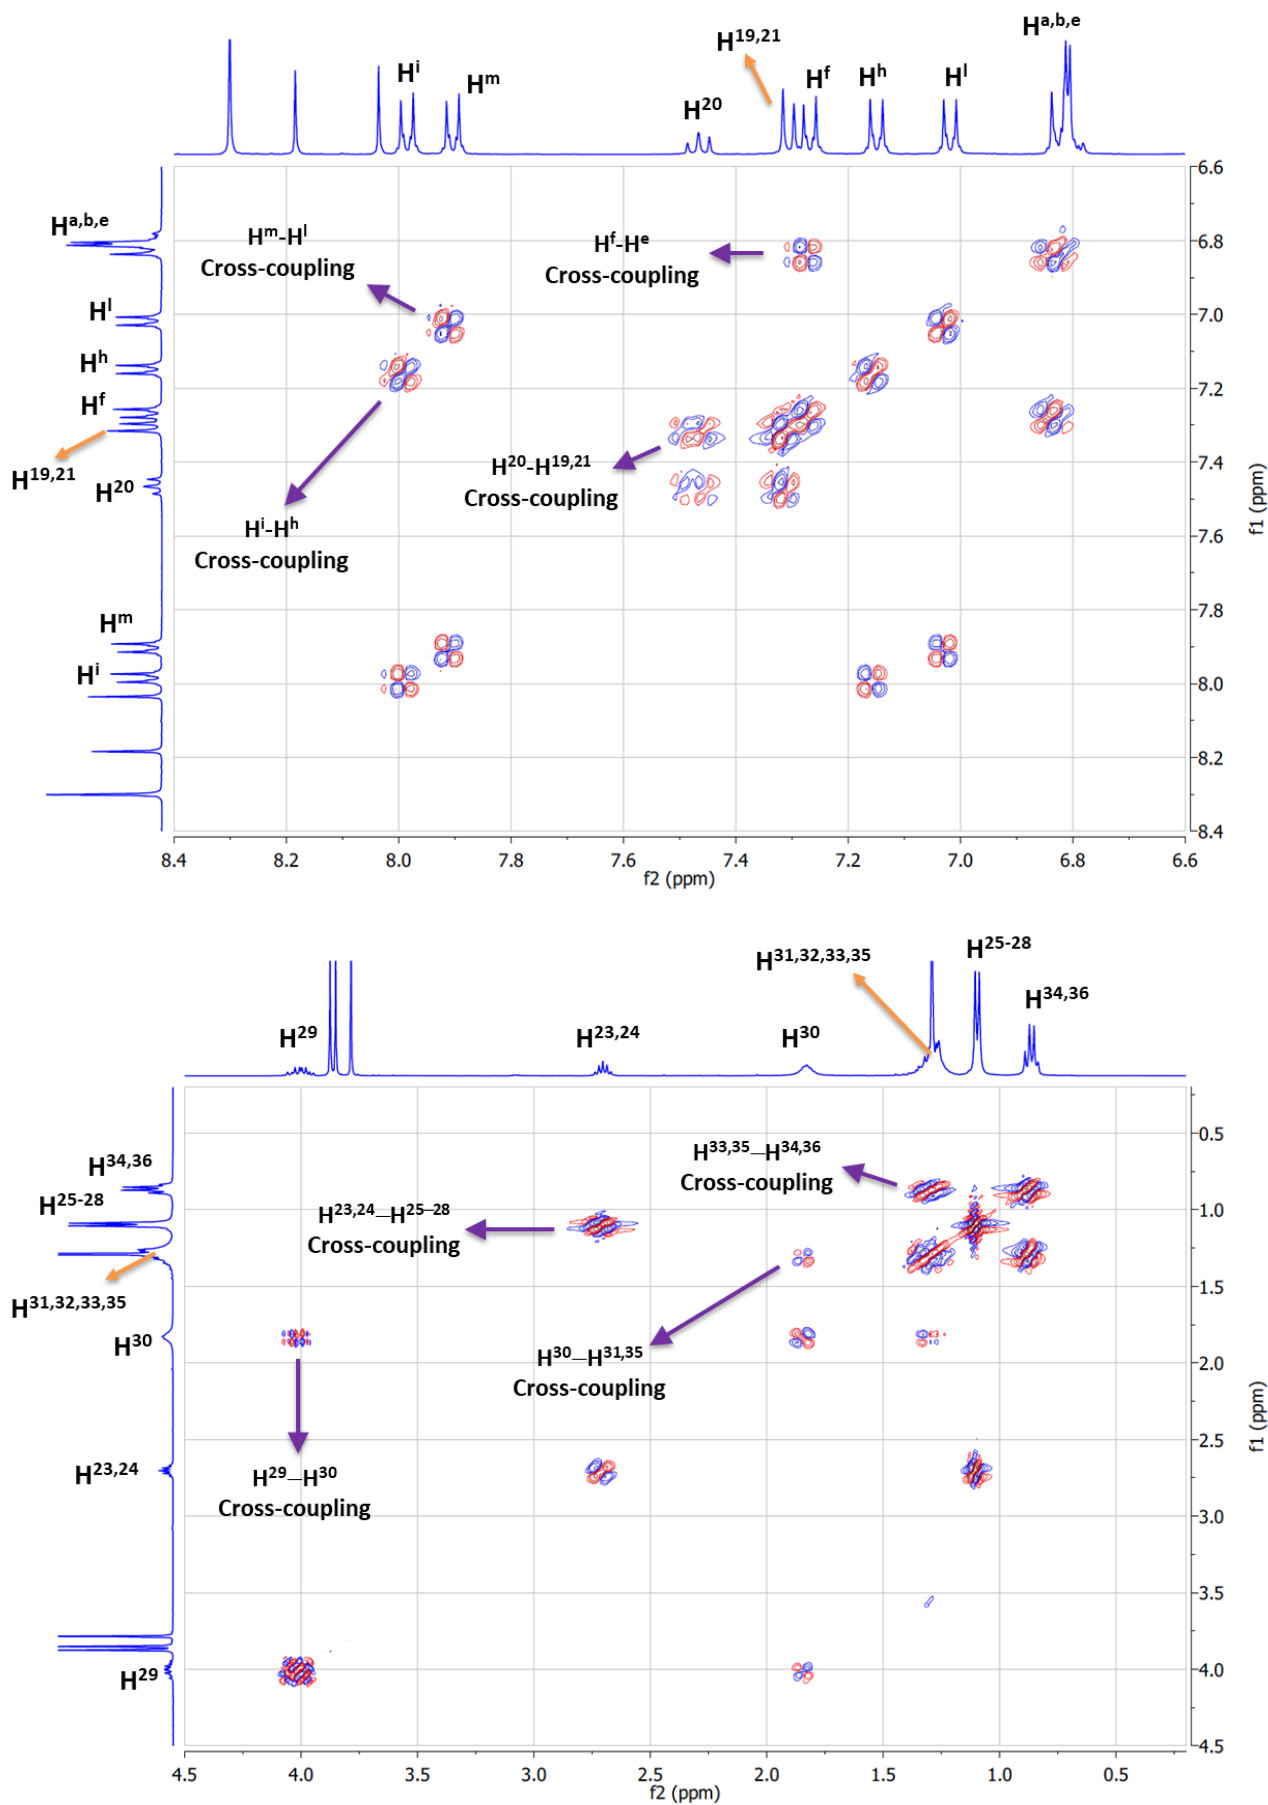

**Figure S-3.34:**  $^1\text{H}$ - $^1\text{H}$  gDQCOSY NMR spectrum ( $\text{CD}_2\text{Cl}_2$ , 400 MHz) of compound **15** with the indication of through-bond coupled protons (aromatic region at the top and aliphatic region at the bottom).



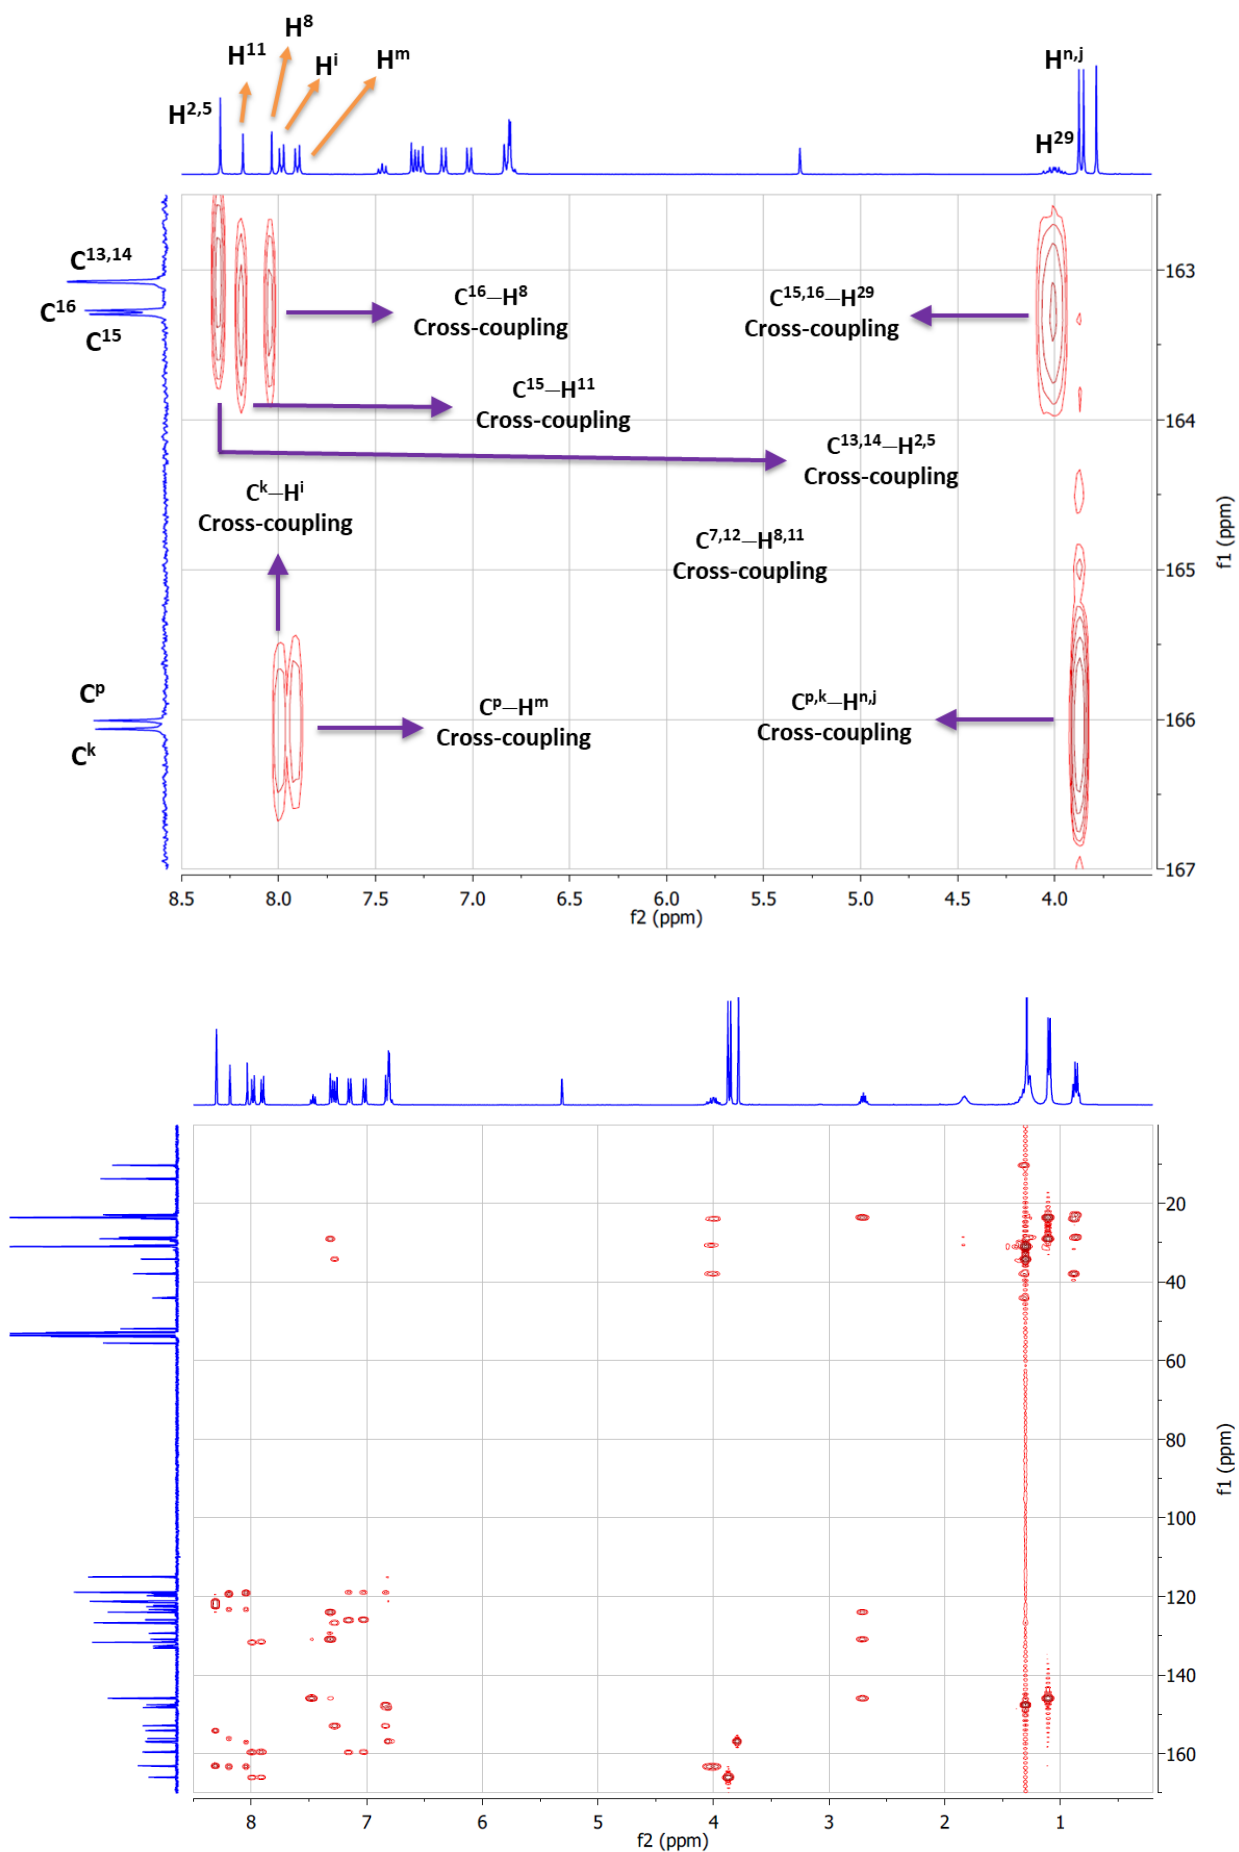

**Figure S-3.35:**  $^1\text{H}$ - $^{13}\text{C}$  gHMBC NMR spectrum ( $\text{CD}_2\text{Cl}_2$ , 400 MHz) of compound **15** with the indication of important long-range cross-couplings between proton and carbon atoms (zoomed spectrum at the top and full spectrum at the bottom).

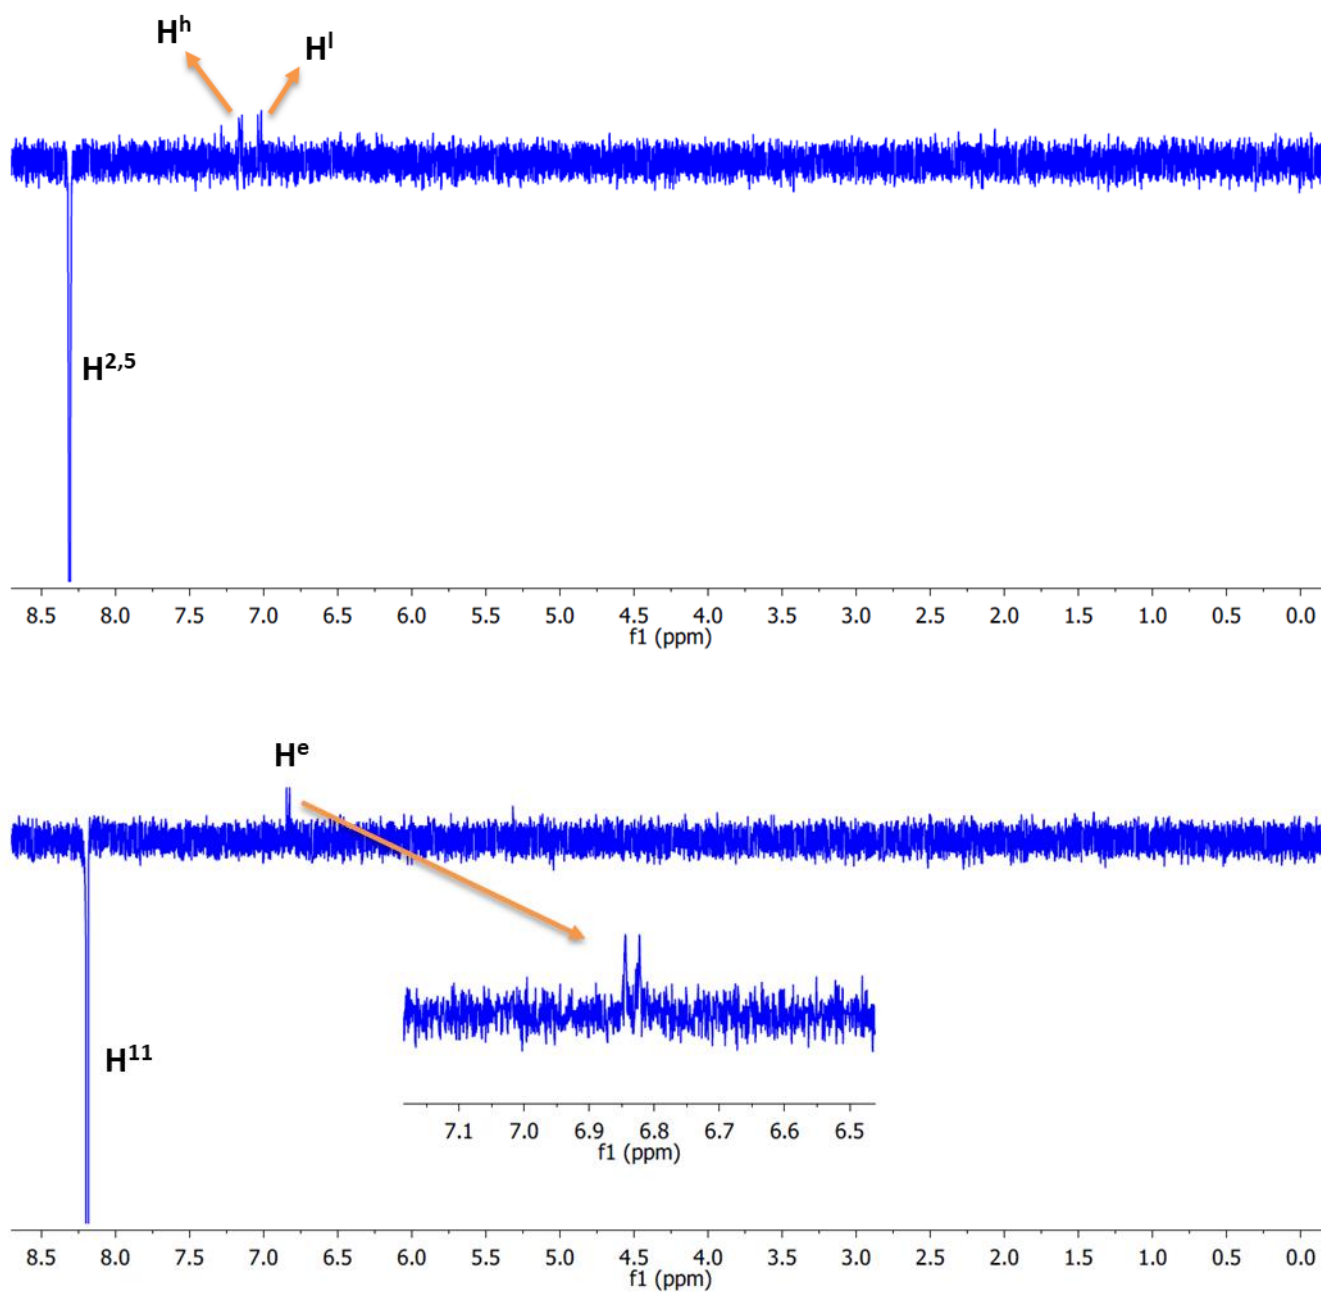

**Figure S-3.36:** <sup>1</sup>H–<sup>1</sup>H 1D NOESY NMR spectra (CD<sub>2</sub>Cl<sub>2</sub>, 400 MHz) of compound **15** with the indication of through-space cross-couplings between crucial protons (H<sup>2,5</sup>–H<sup>h,l</sup> coupling at the top and H<sup>e</sup>–H<sup>11</sup> coupling at the bottom).

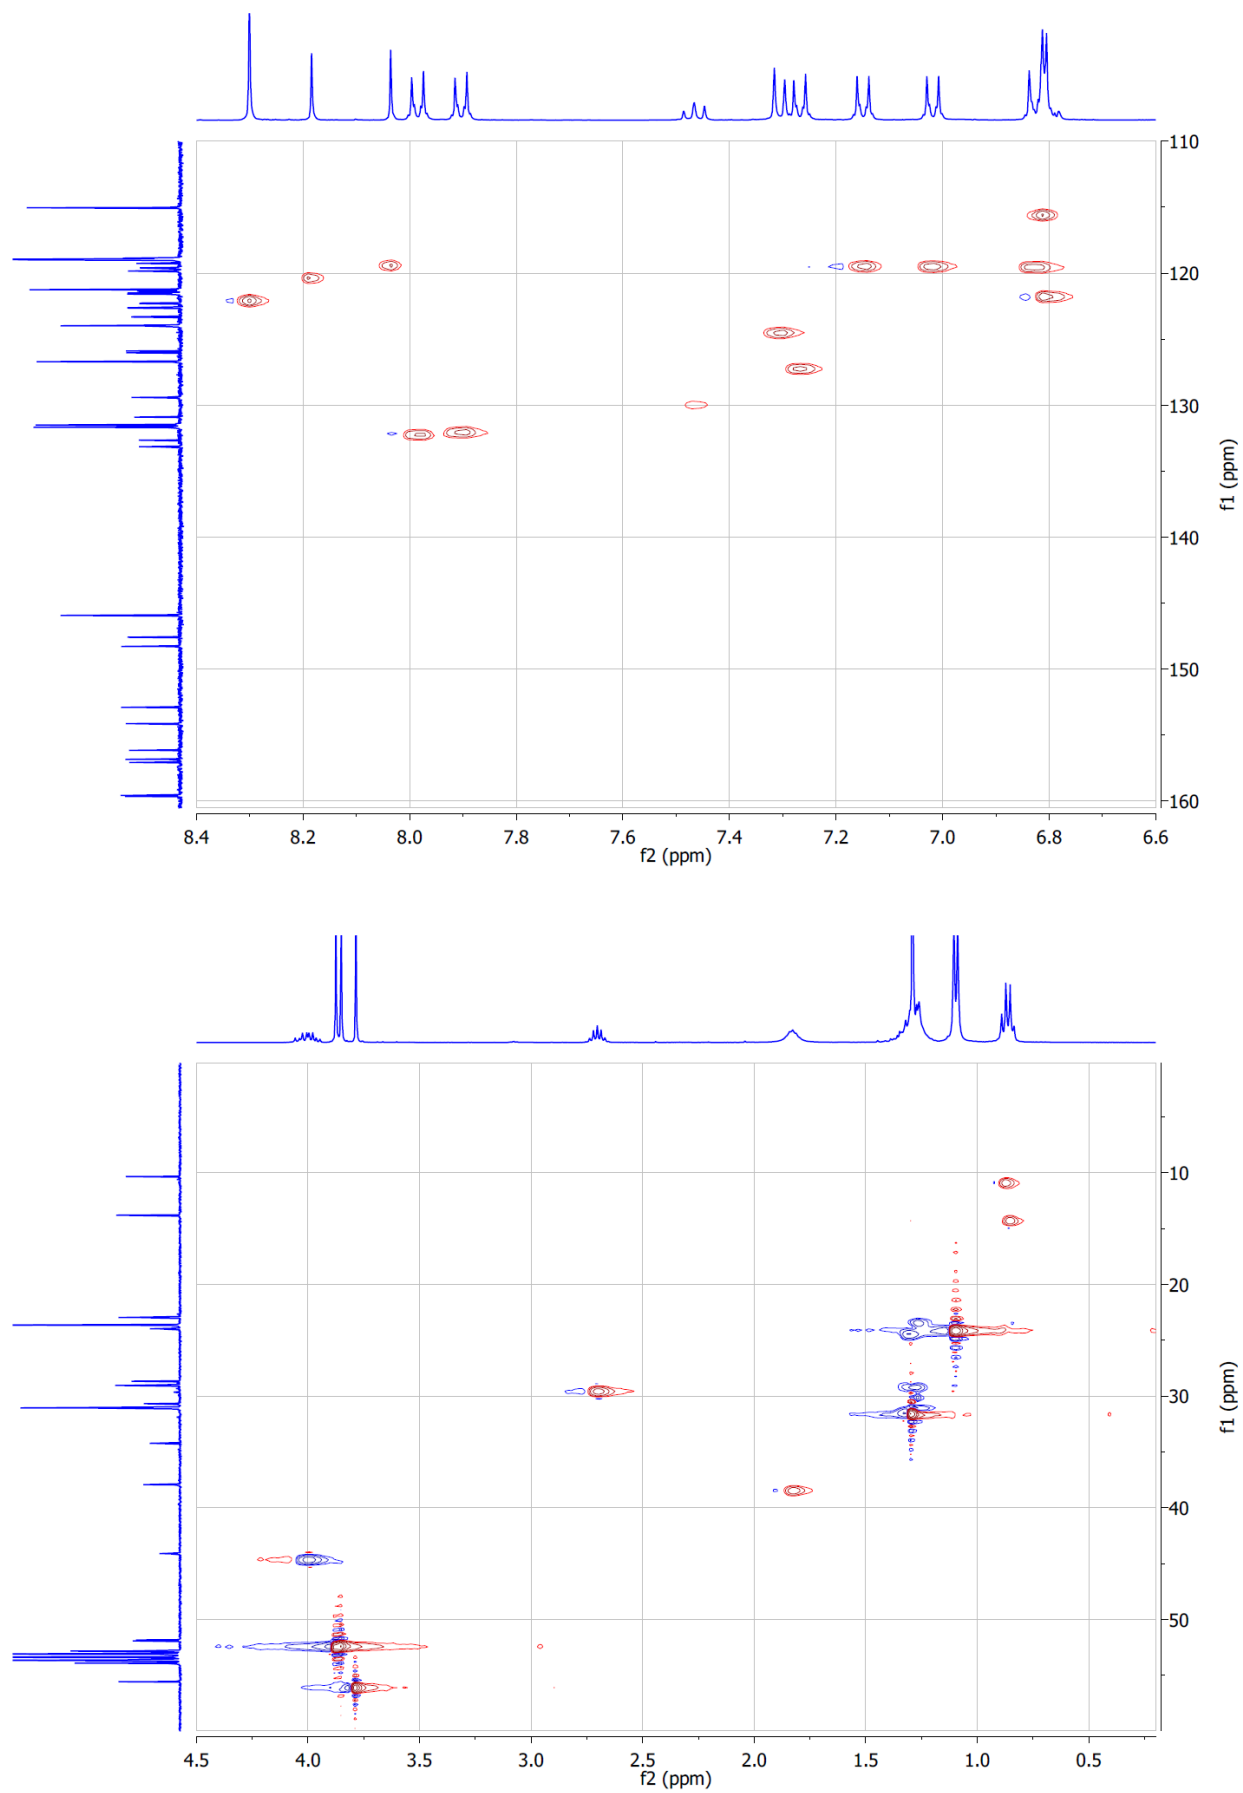

**Figure S-3.37:**  $^1\text{H}$ - $^{13}\text{C}$  gHSQC NMR spectrum ( $\text{CD}_2\text{Cl}_2$ , 400 MHz) of compound **15** (Aromatic part at the top and aliphatic part at the bottom).

## Section 4. $^1\text{H}$ and $^{13}\text{C}\{^1\text{H}\}$ NMR spectra

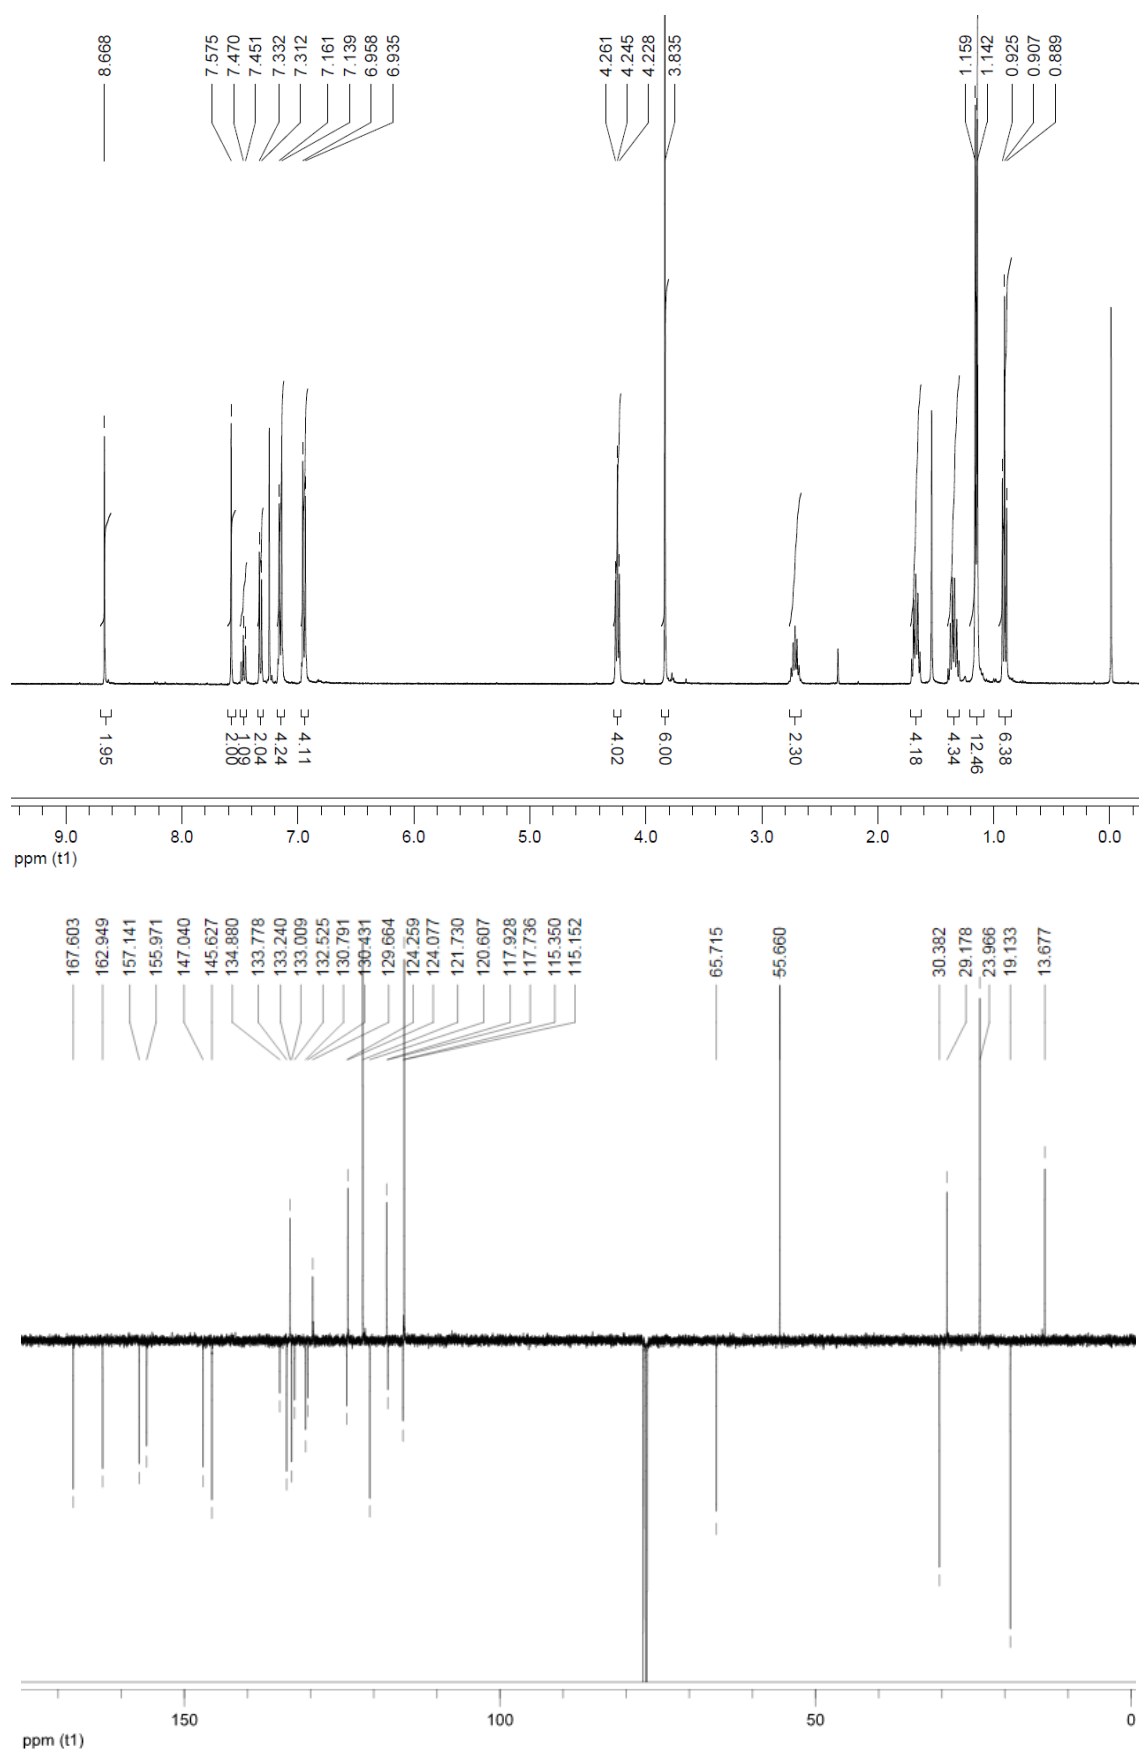

**Figure S-4.1:**  $^1\text{H}$  and  $^{13}\text{C}$ -APT NMR spectra of compound 2.

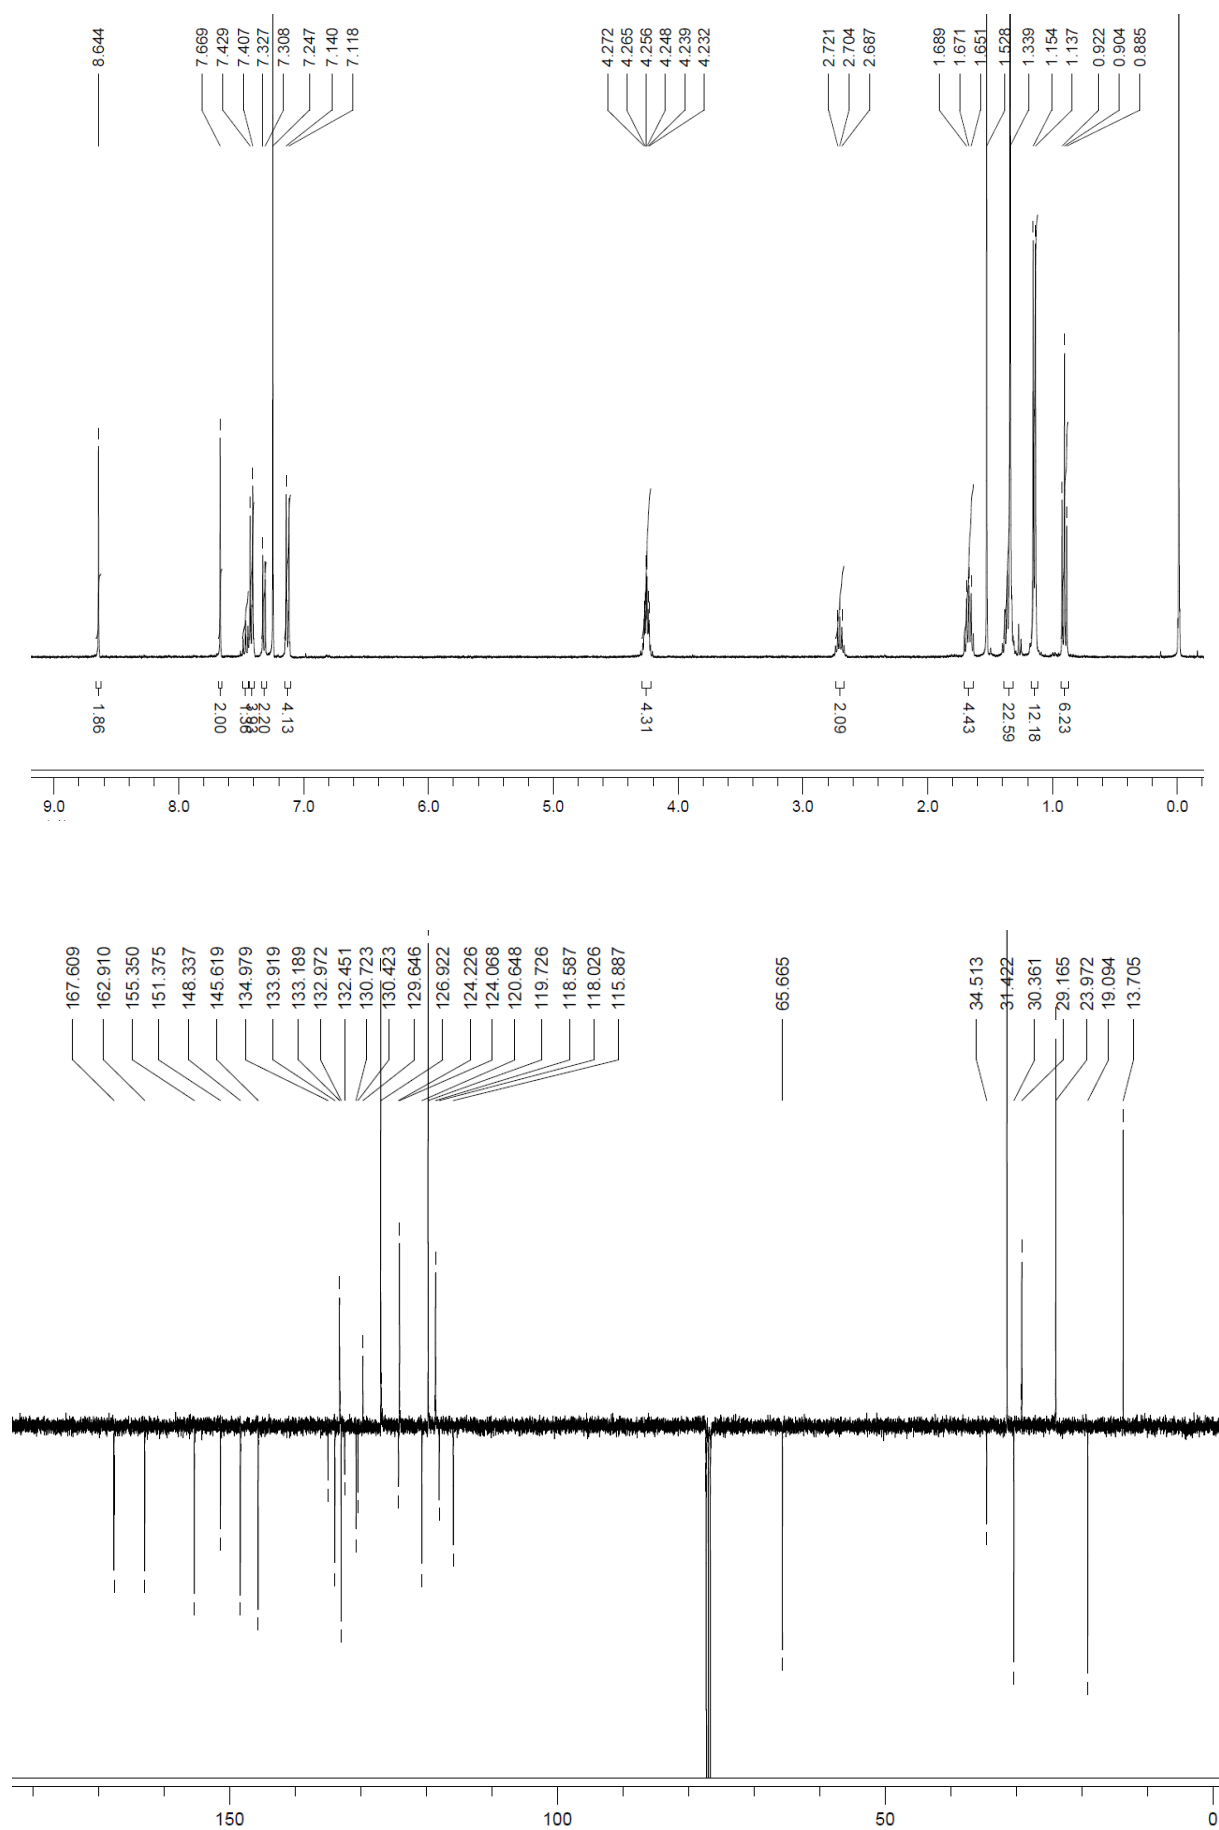

**Figure S-4.2:** <sup>1</sup>H and <sup>13</sup>C APT NMR spectra of compound **3**.

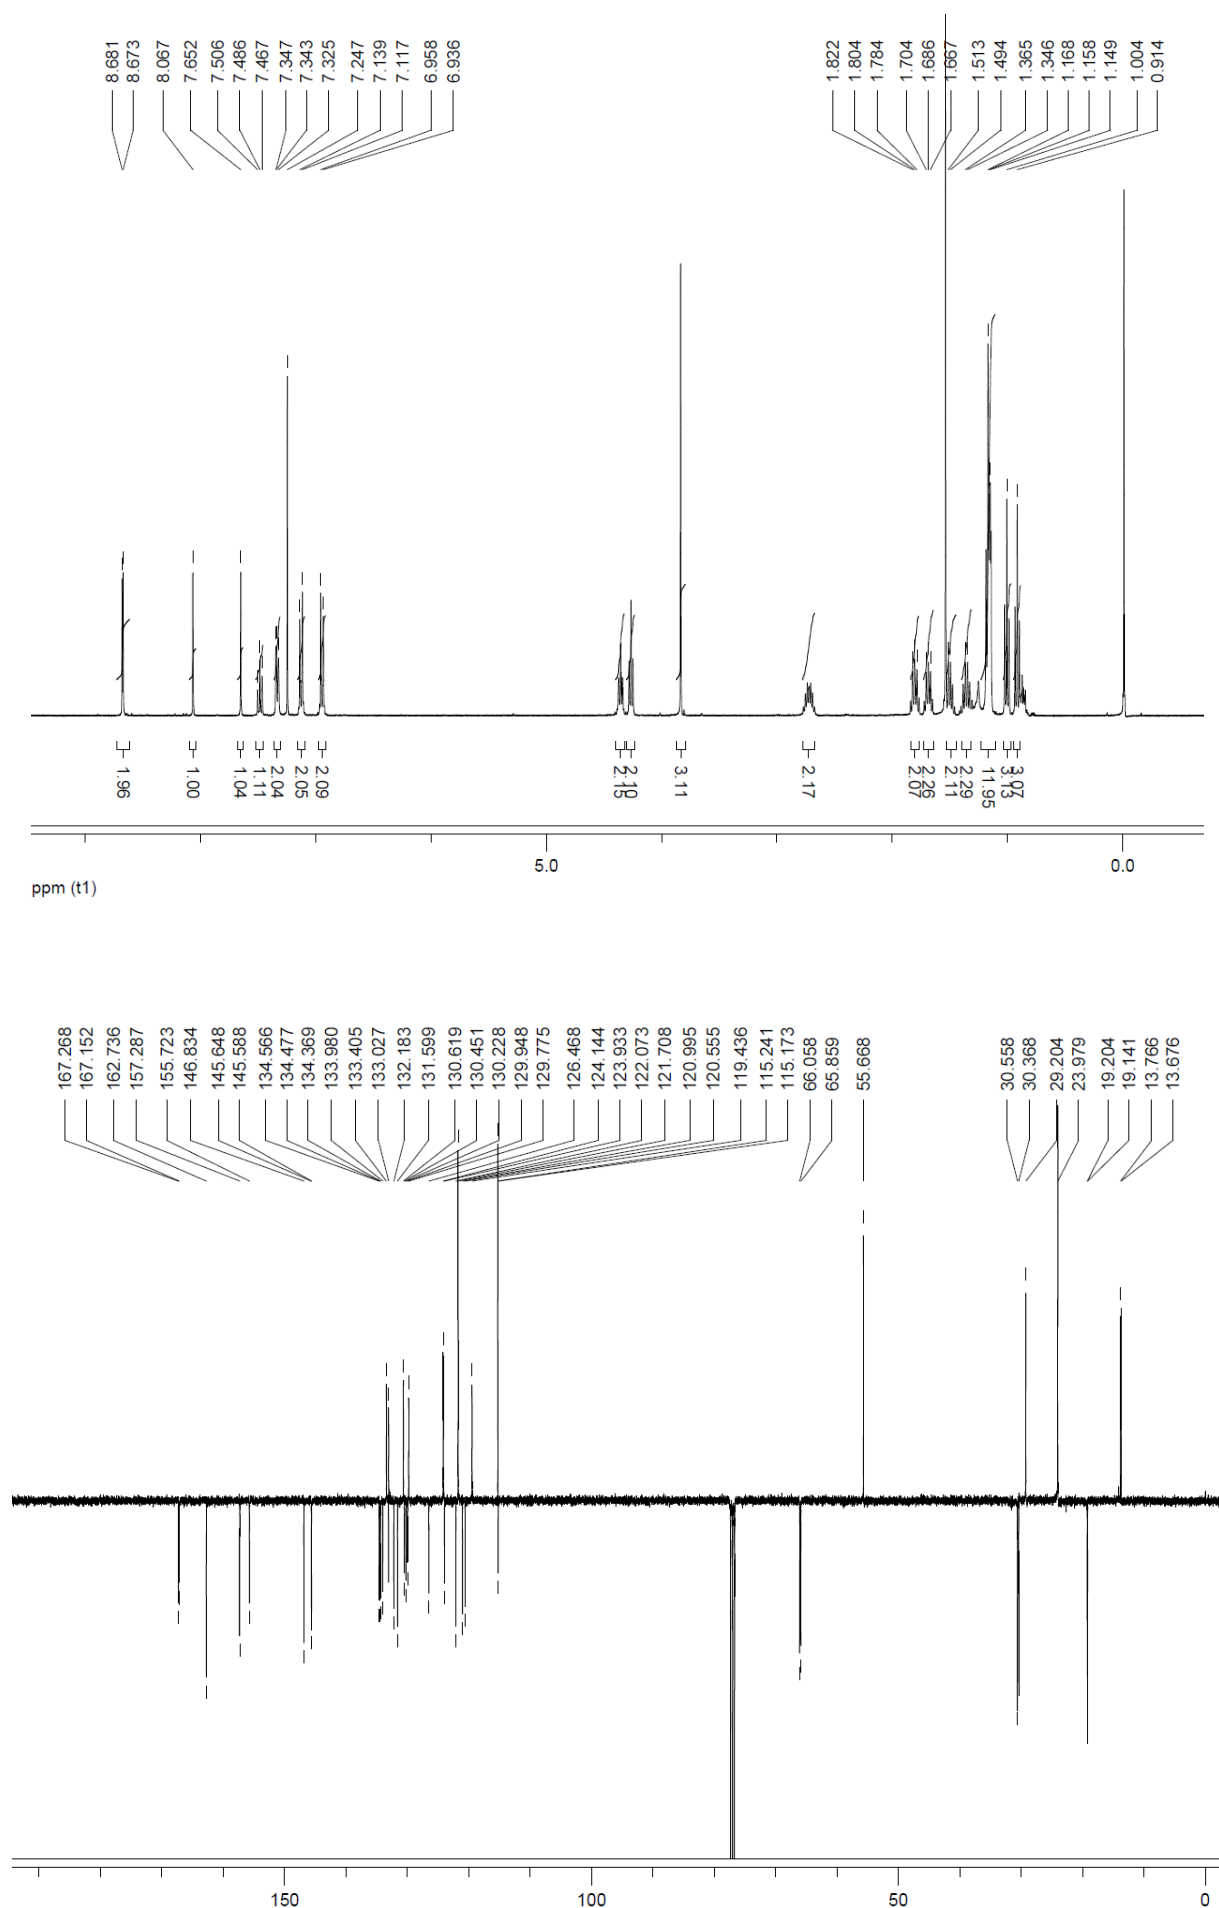

**Figure S-4.3:** <sup>1</sup>H and <sup>13</sup>C APT NMR spectra of compound **4**.

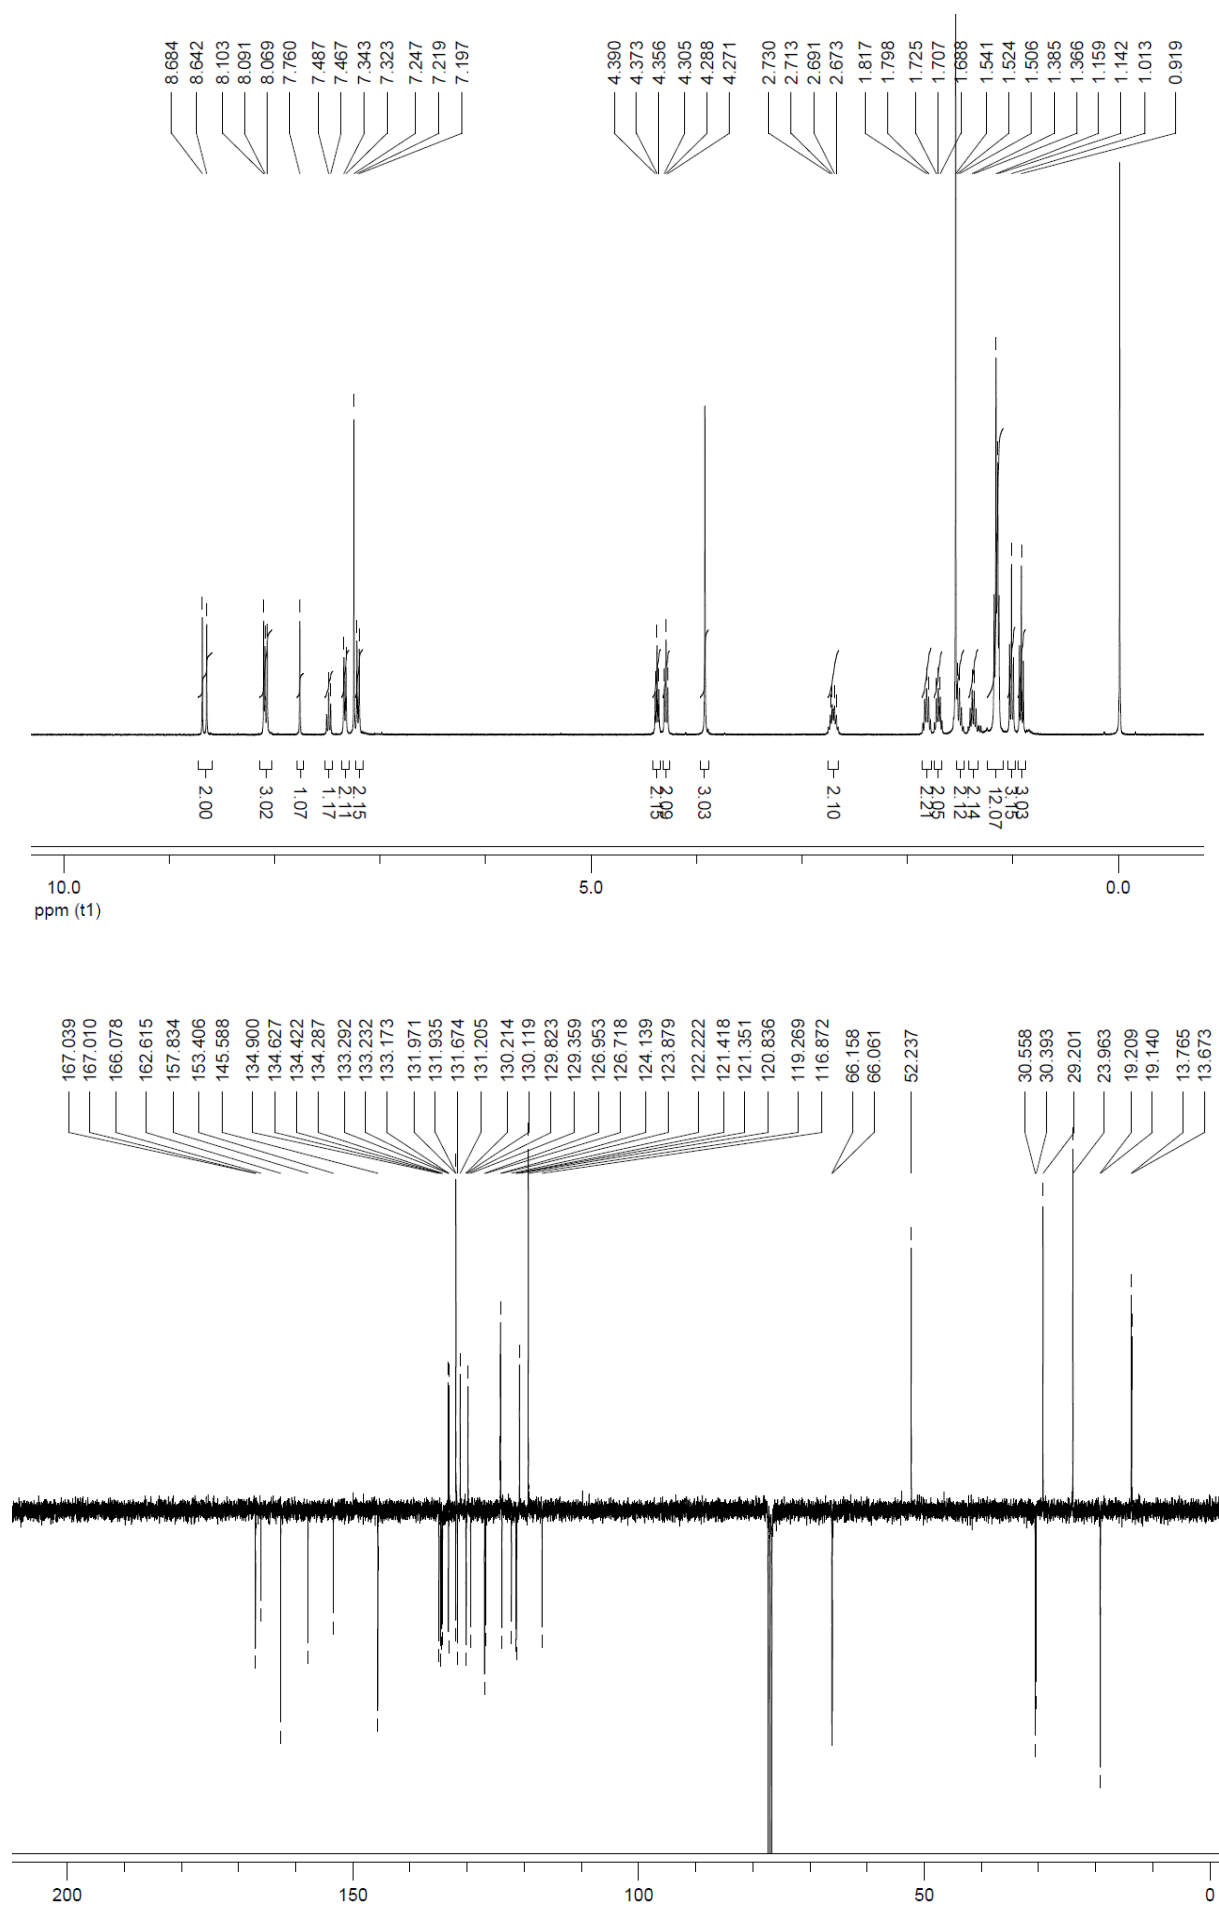

**Figure S-4.4:** <sup>1</sup>H and <sup>13</sup>C APT NMR spectra of compound **5**.

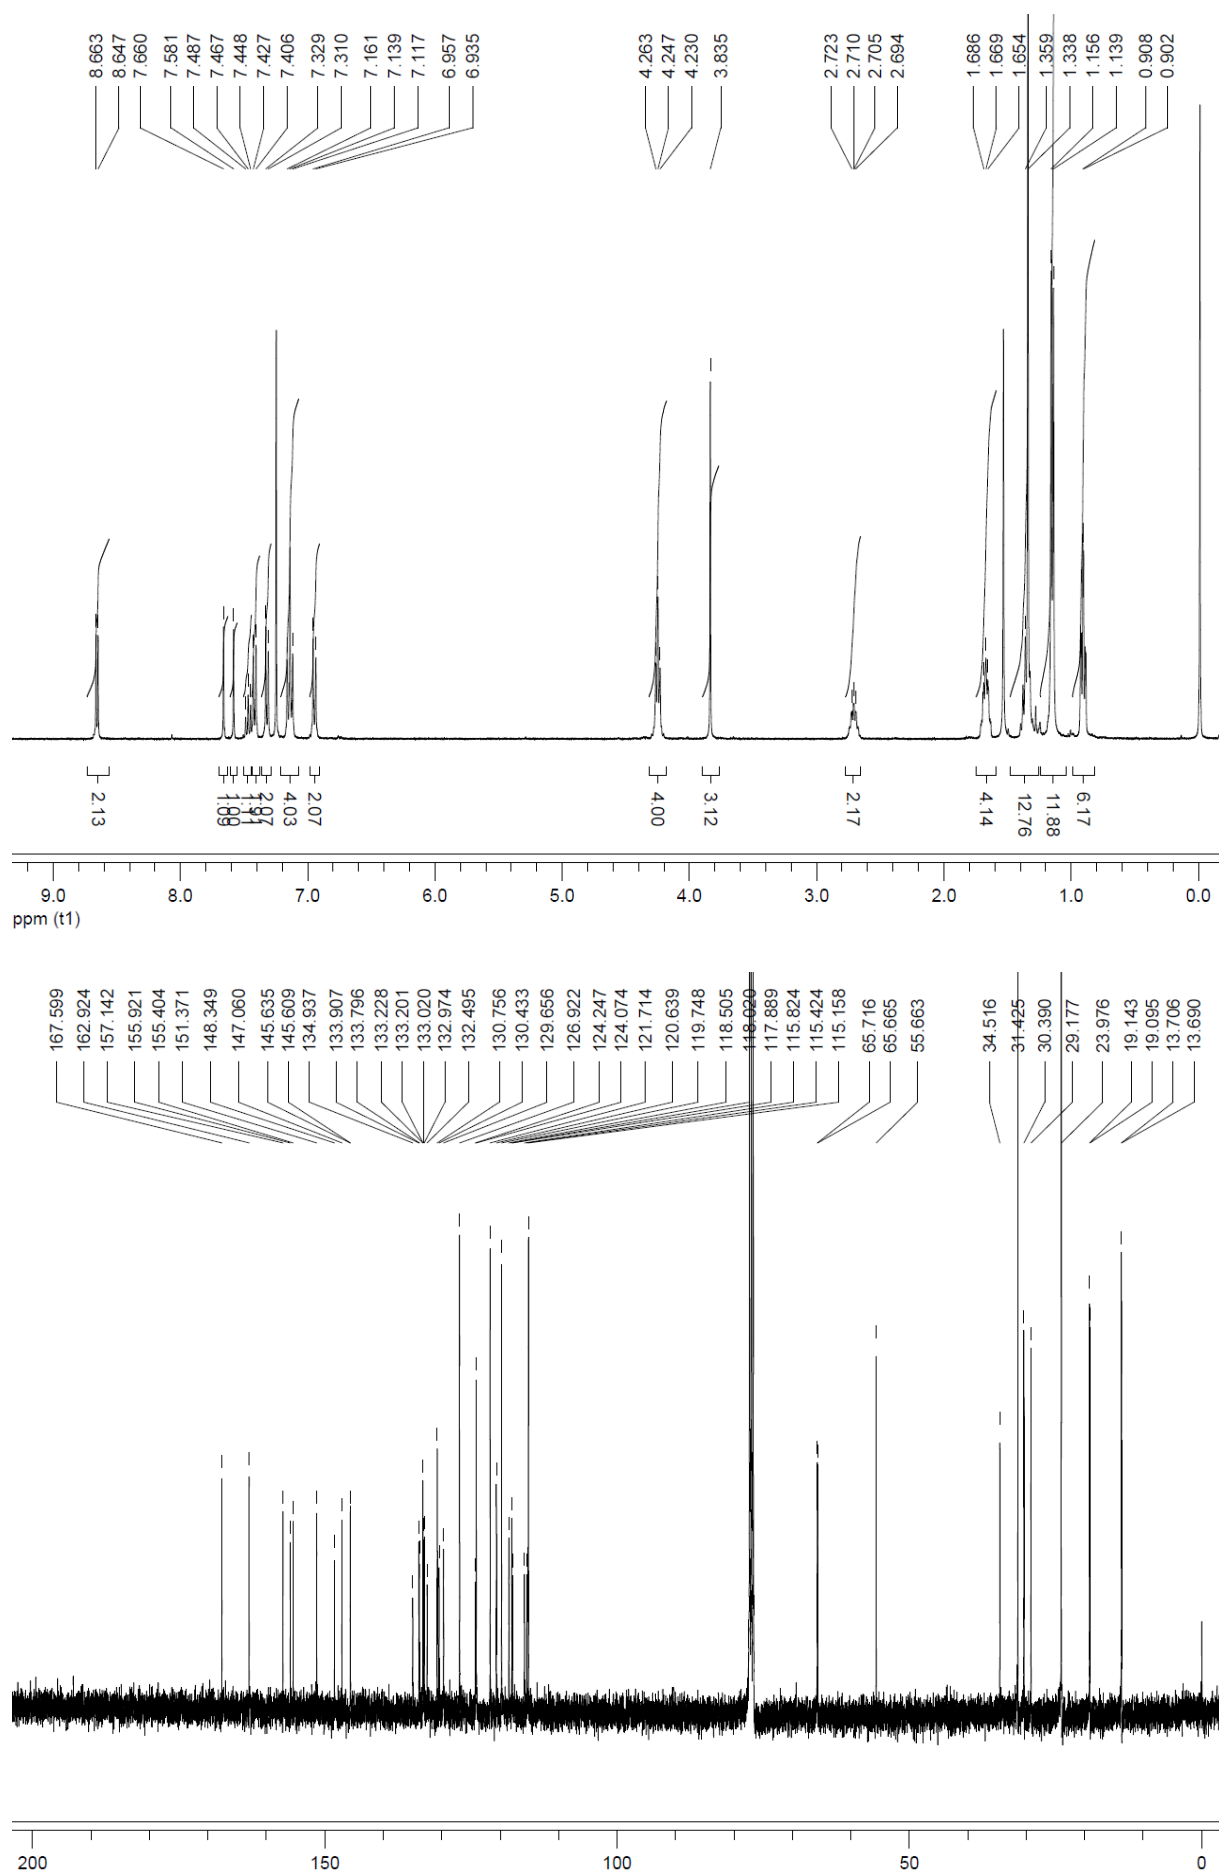

**Figure S-4.5:** <sup>1</sup>H and <sup>13</sup>C NMR spectra of compound **6**.



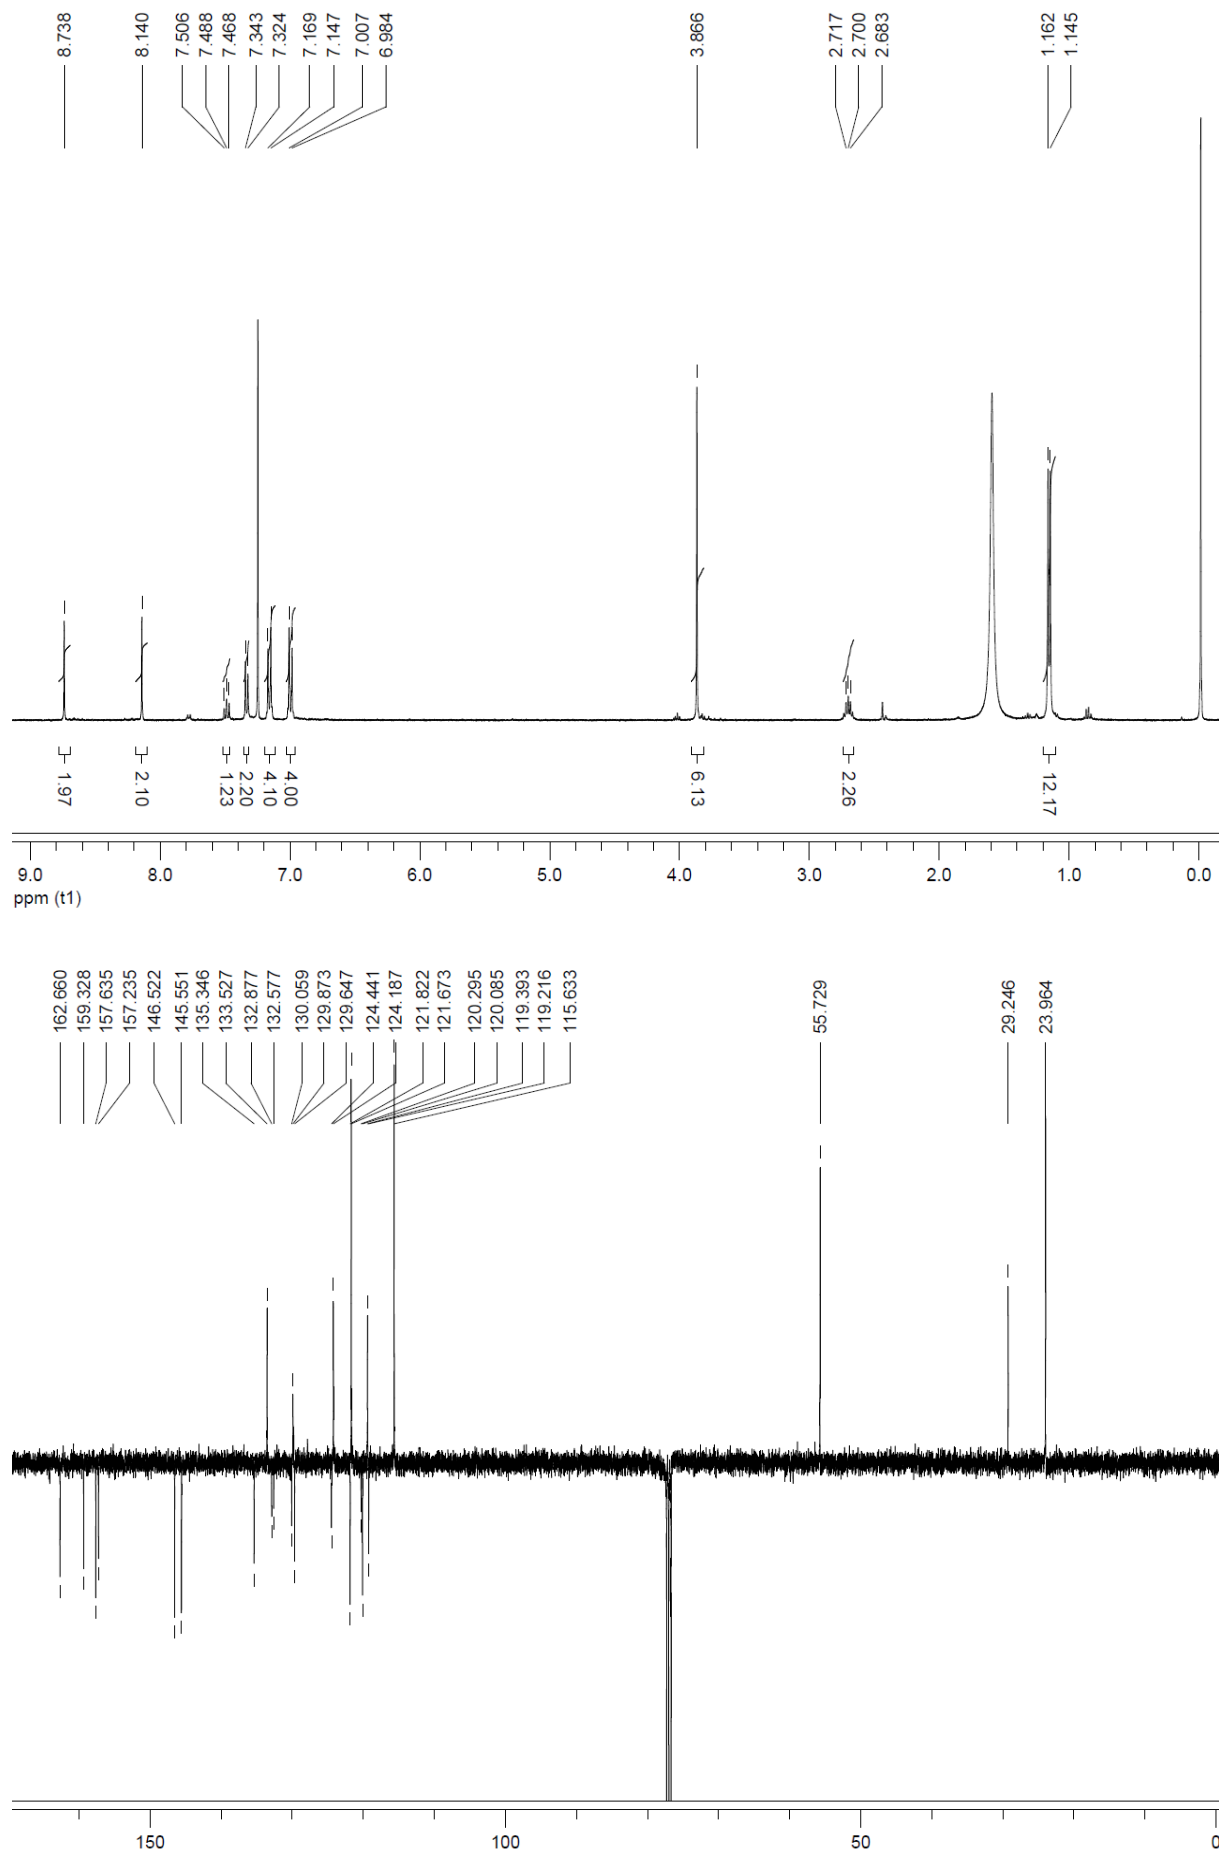

**Figure S-4.6:**  $^1\text{H}$  and  $^{13}\text{C}$  APT NMR spectra of compound **7**.

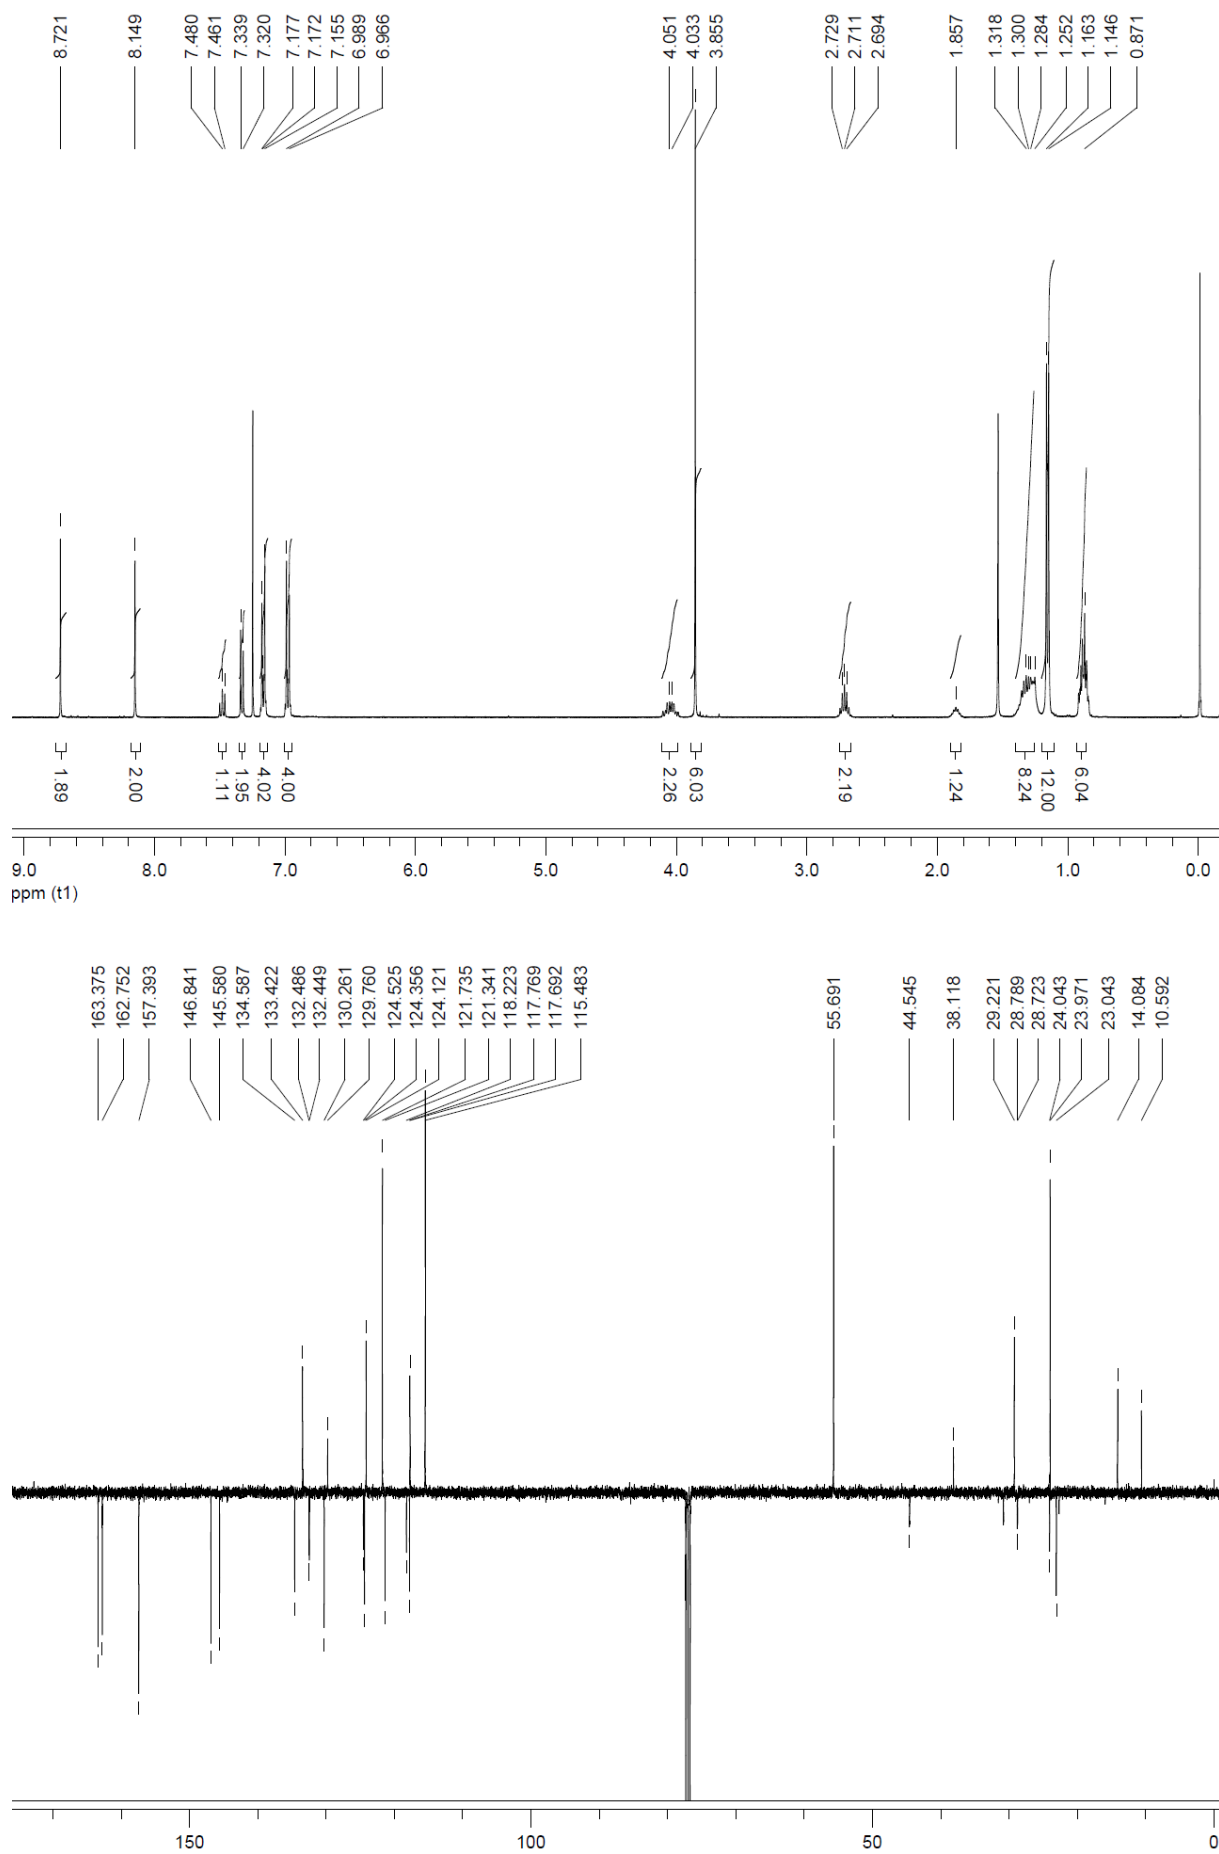

**Figure S-4.7:** <sup>1</sup>H and <sup>13</sup>C APT NMR spectra of compound **8**.

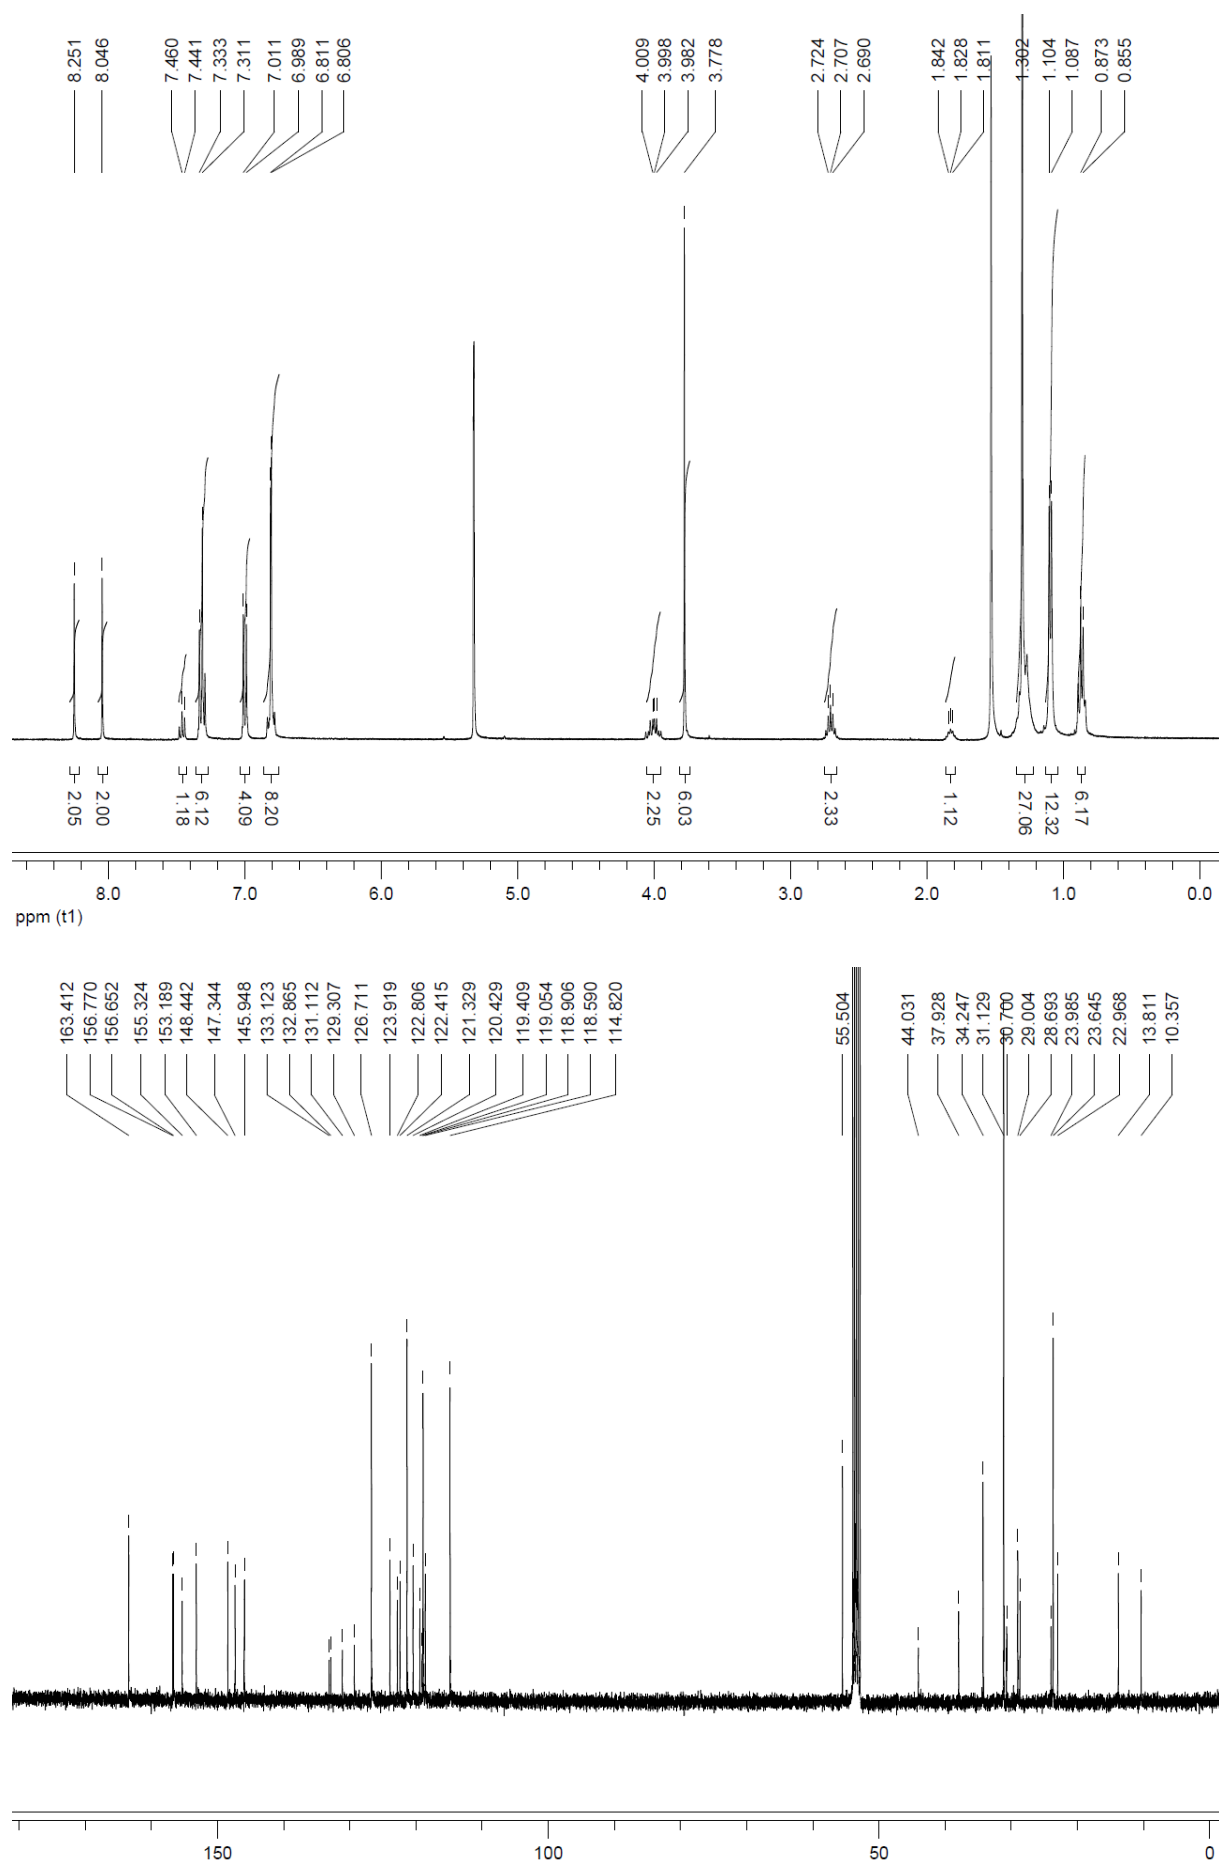

**Figure S-4.8:**  $^1\text{H}$  and  $^{13}\text{C}$  NMR spectra of compound **9**.

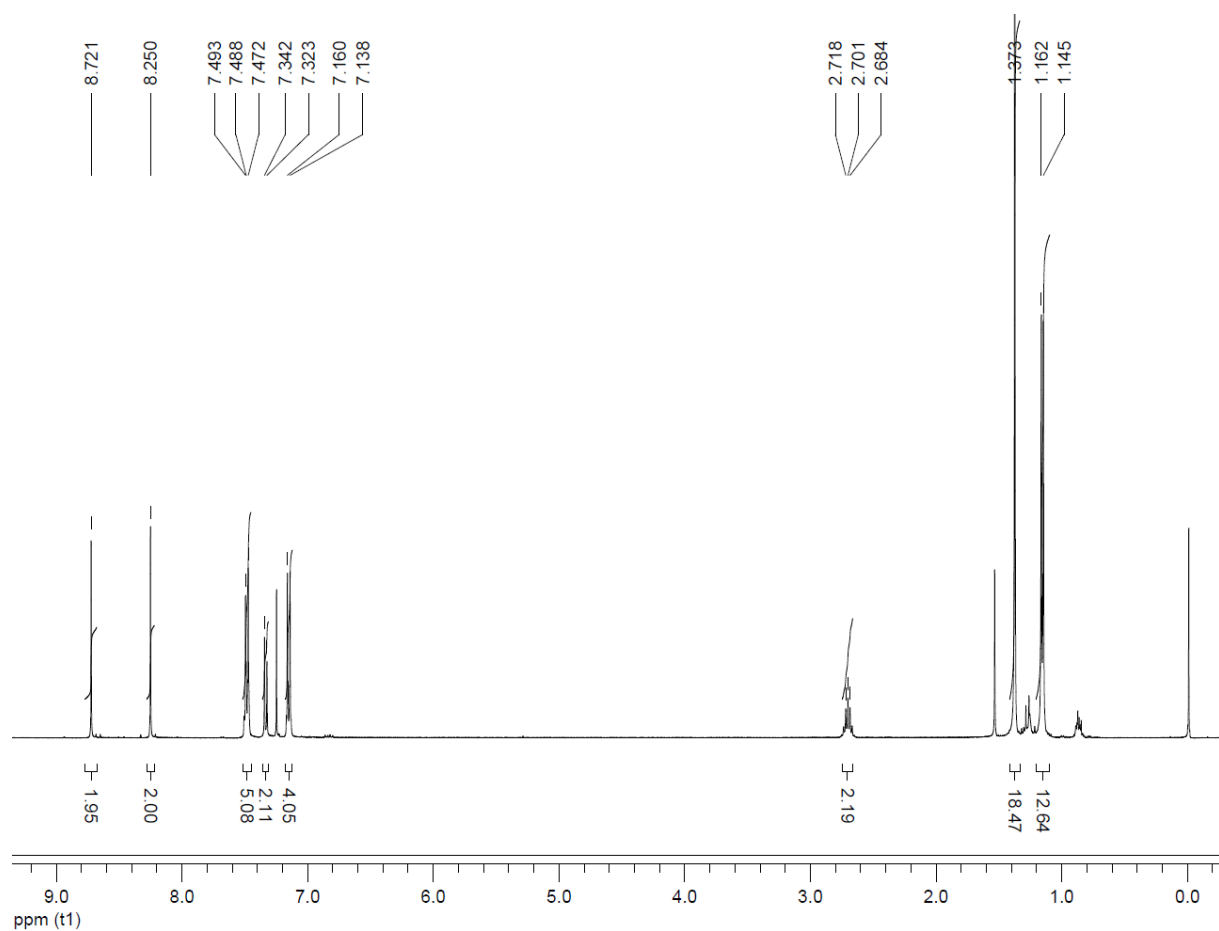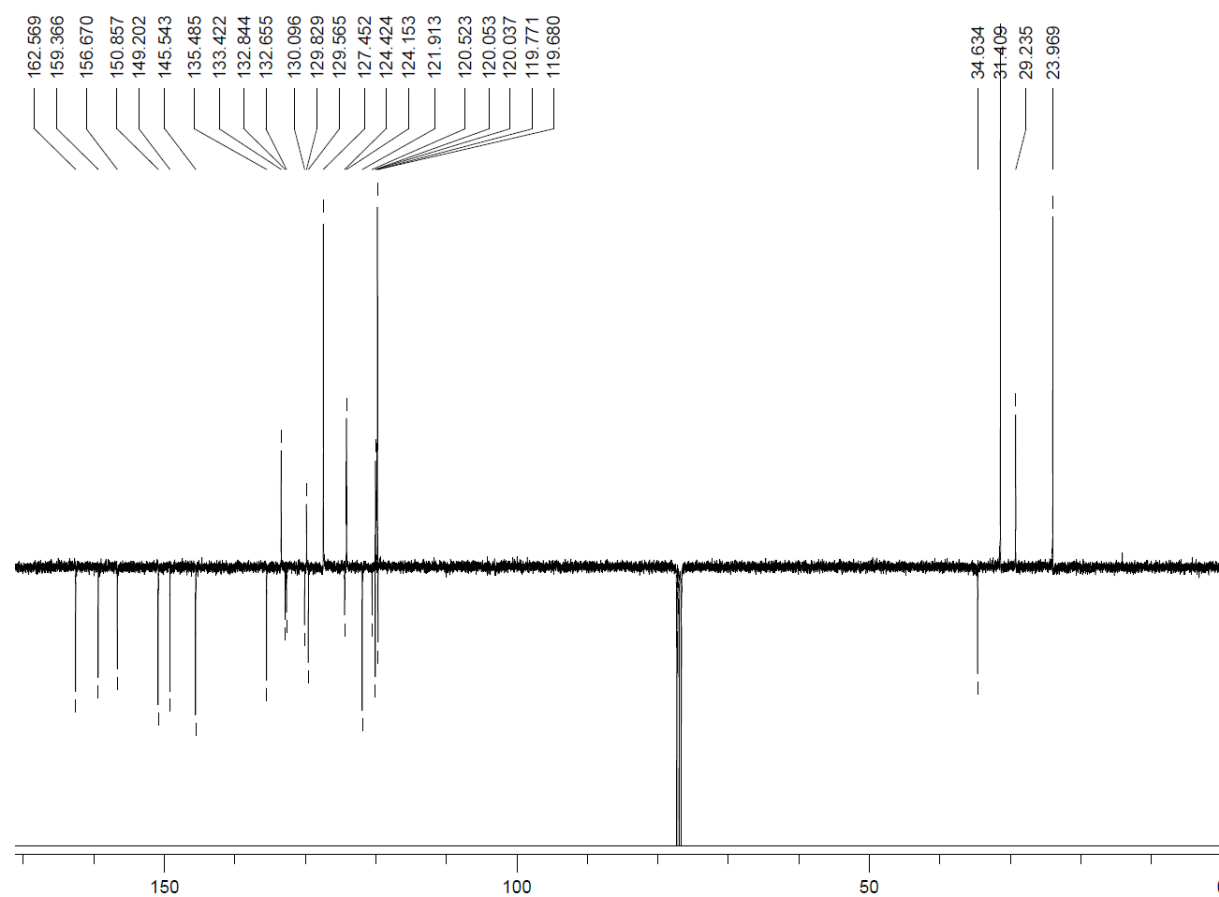

**Figure S-4.9:** <sup>1</sup>H and <sup>13</sup>C APT NMR spectra of compound **10**.

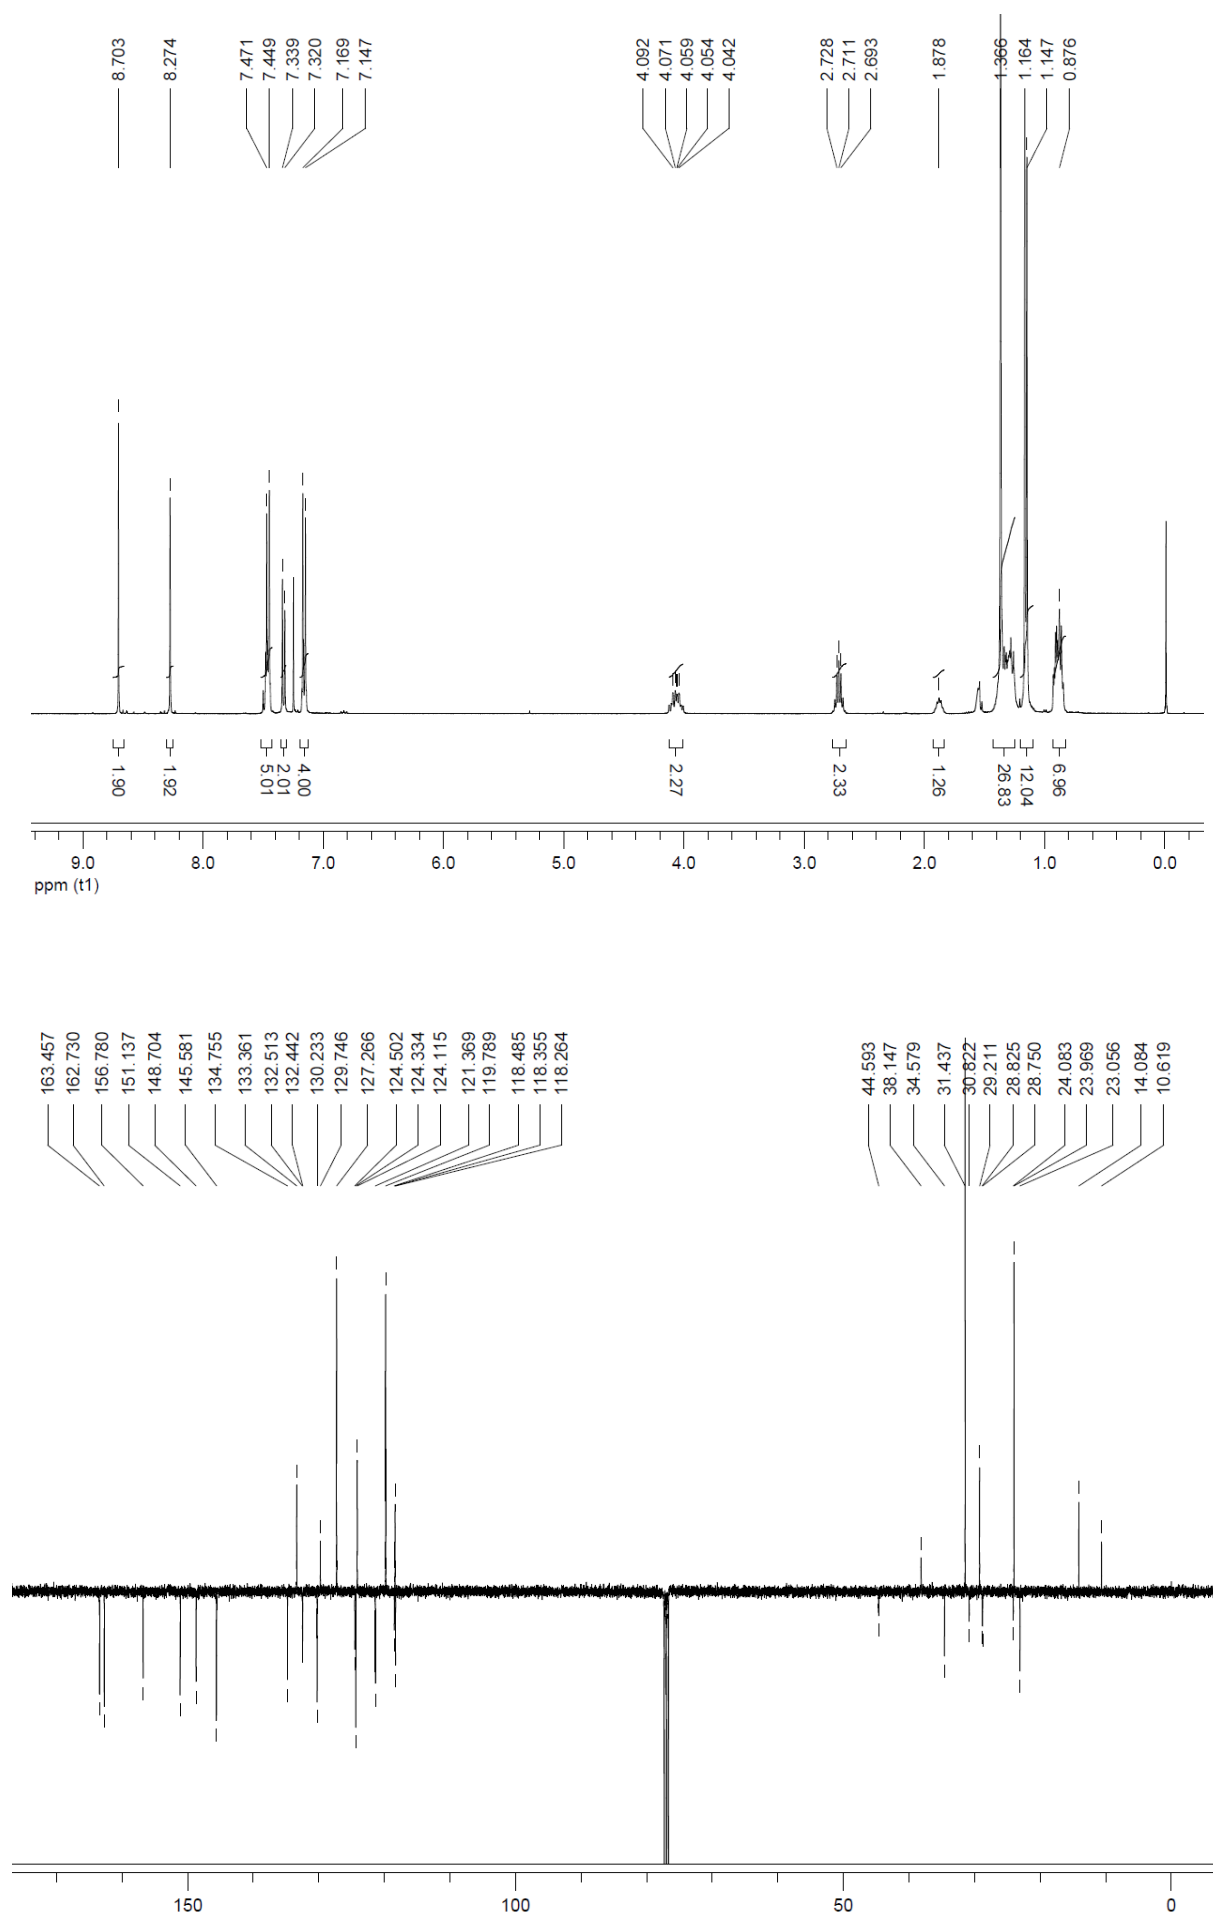

**Figure S-4.10:**  $^1\text{H}$  and  $^{13}\text{C}$  APT NMR spectra of compound **11**.

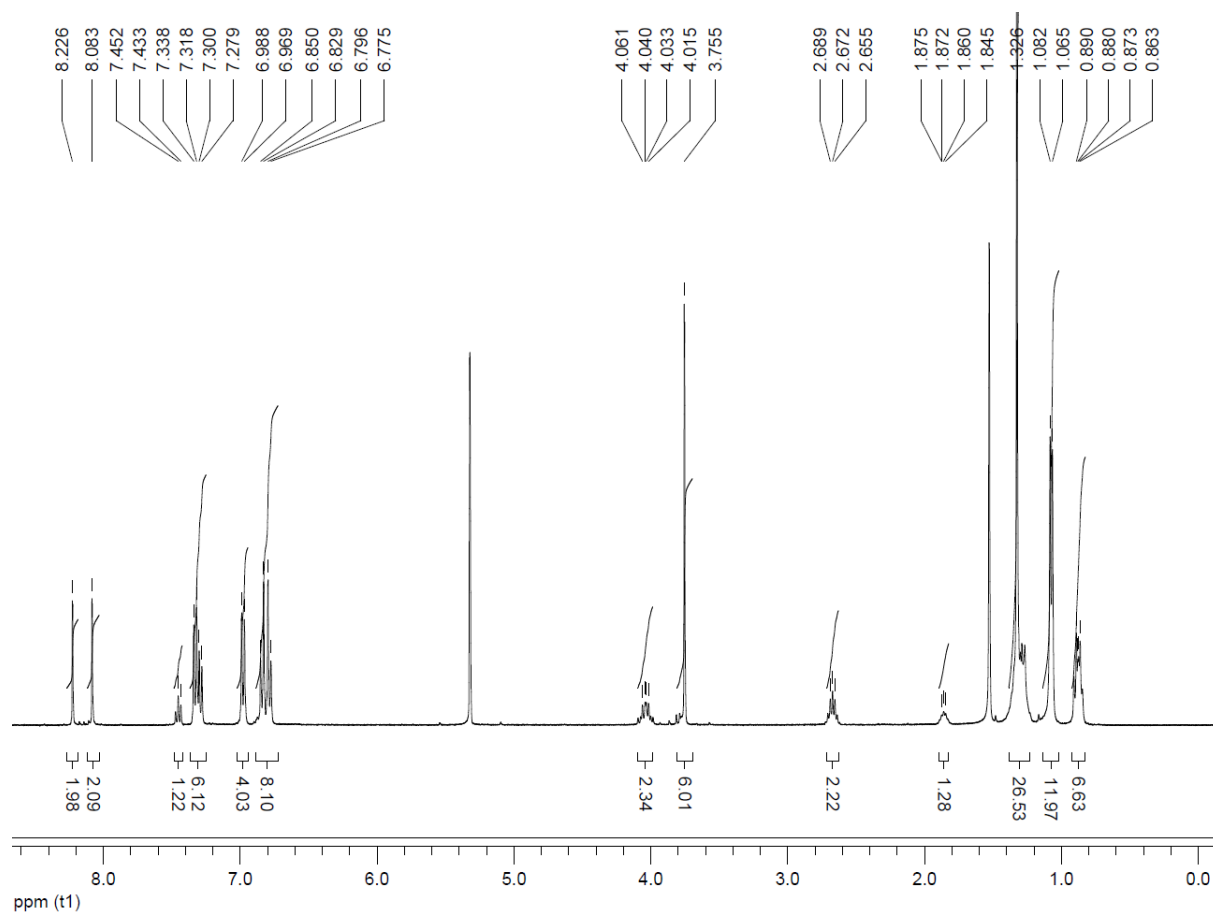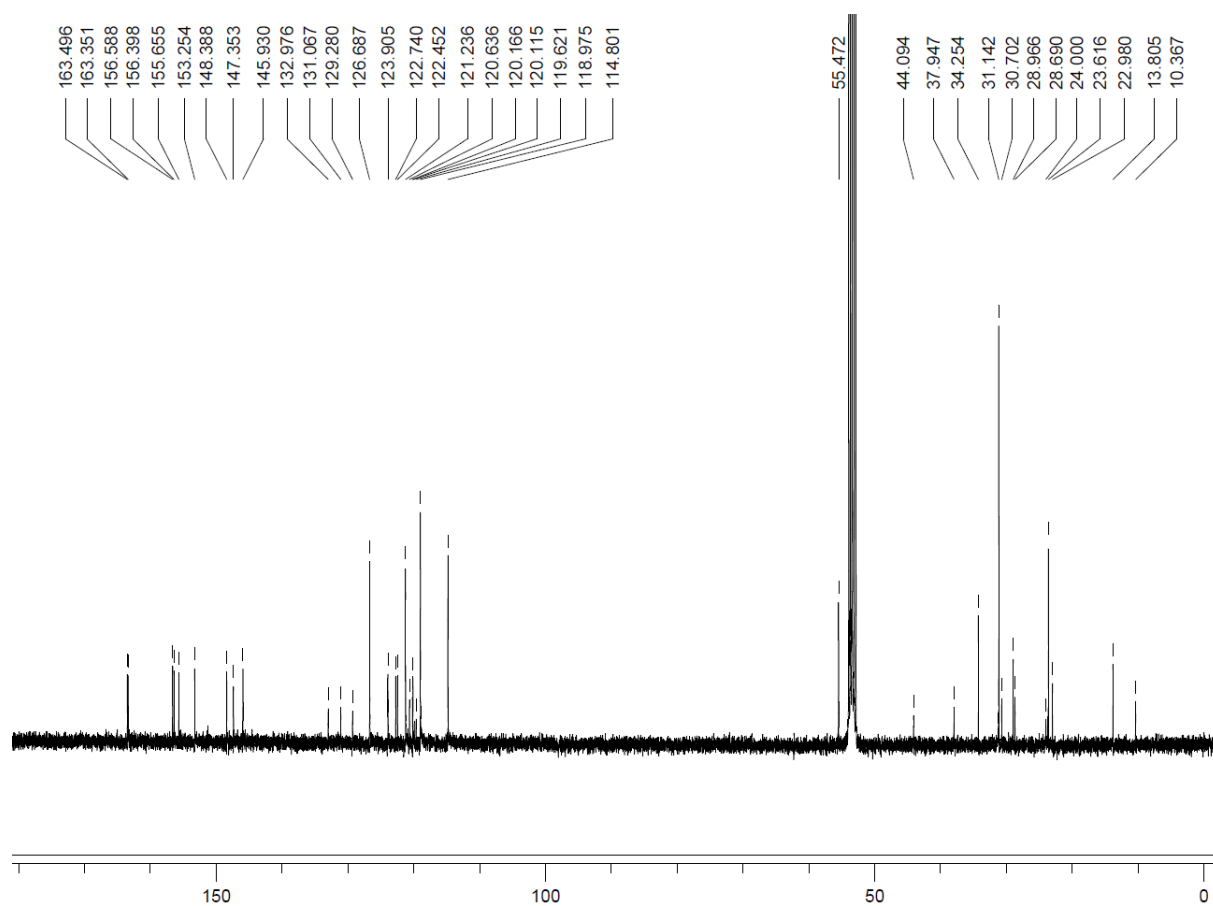

**Figure S-4.11:** <sup>1</sup>H and <sup>13</sup>C NMR spectra of compound 12.

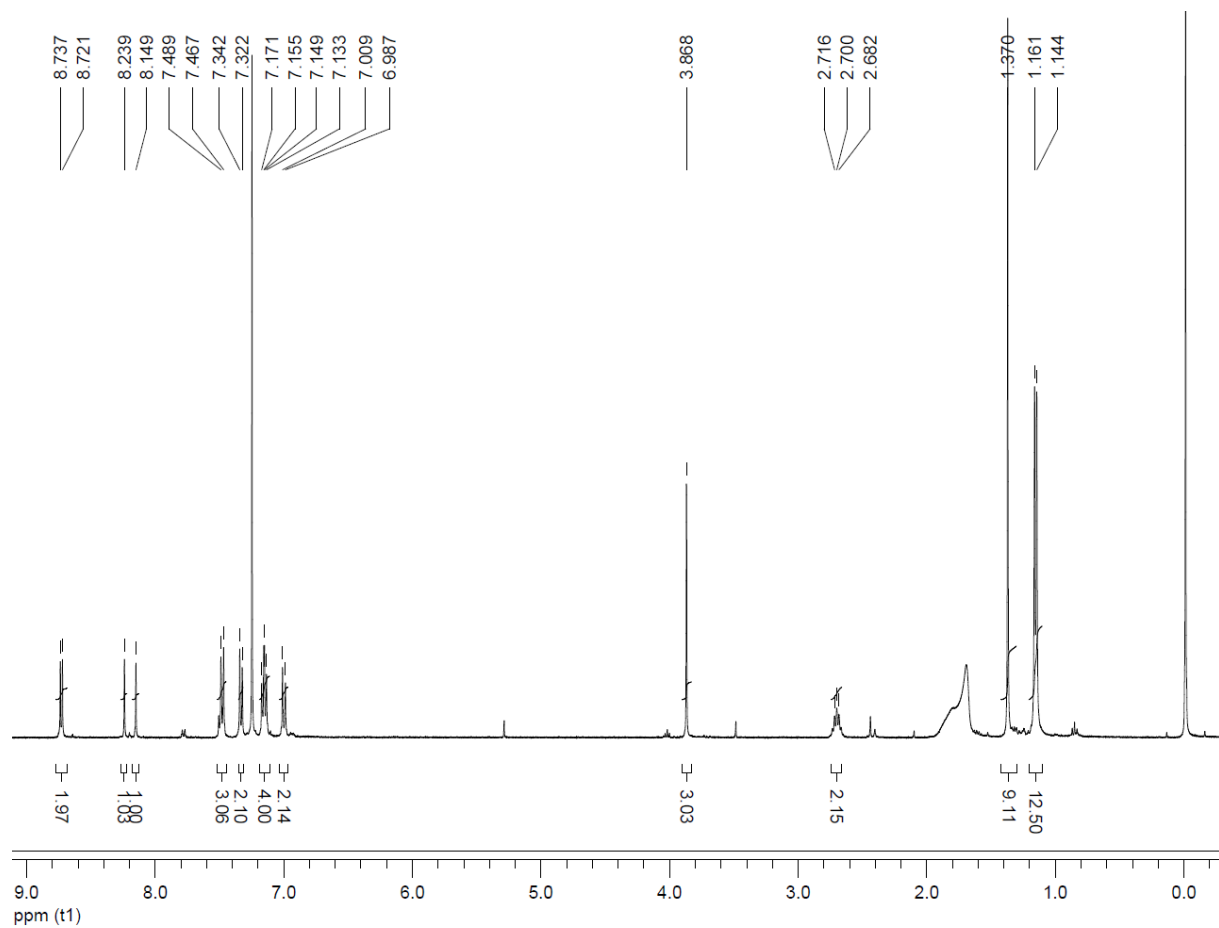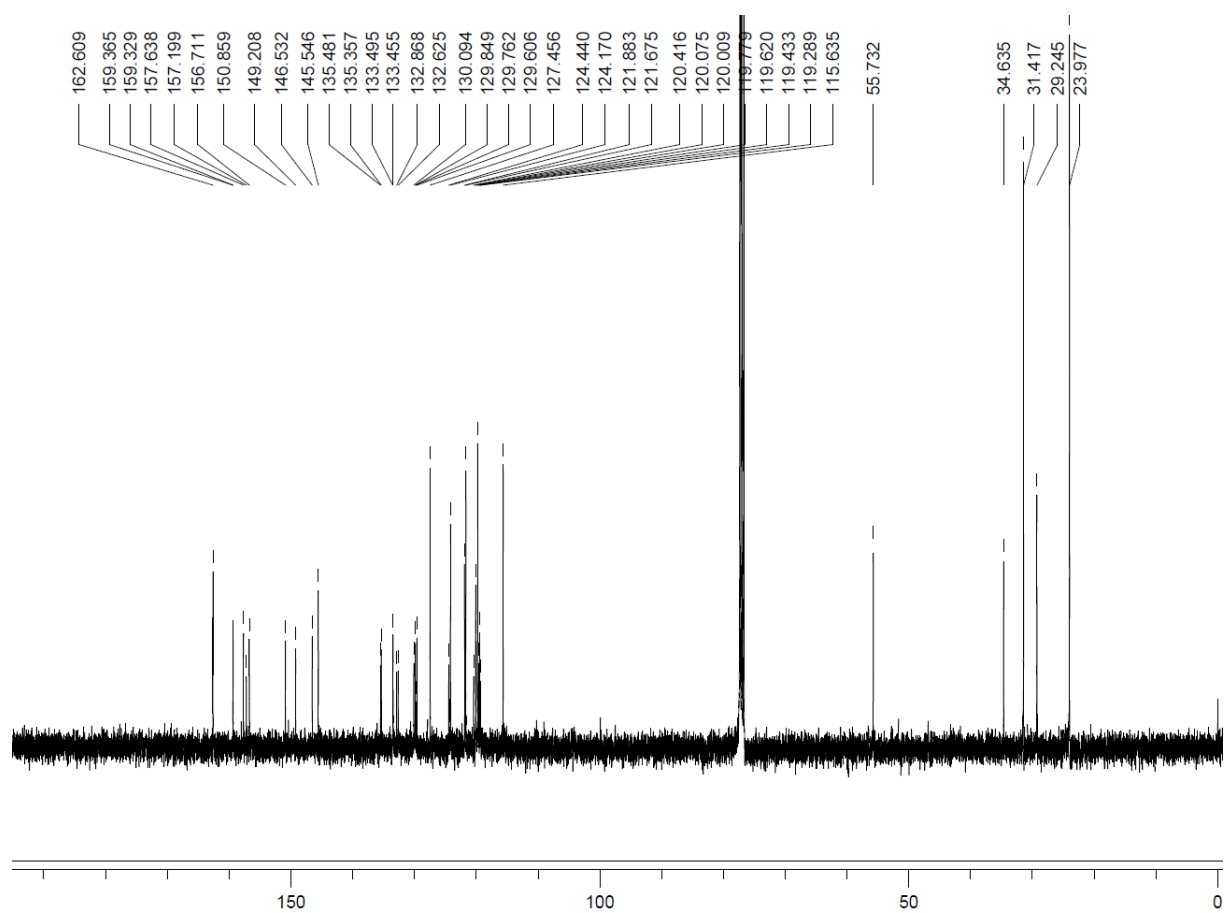

**Figure S-4.12:** <sup>1</sup>H and <sup>13</sup>C NMR spectra of compound 13.

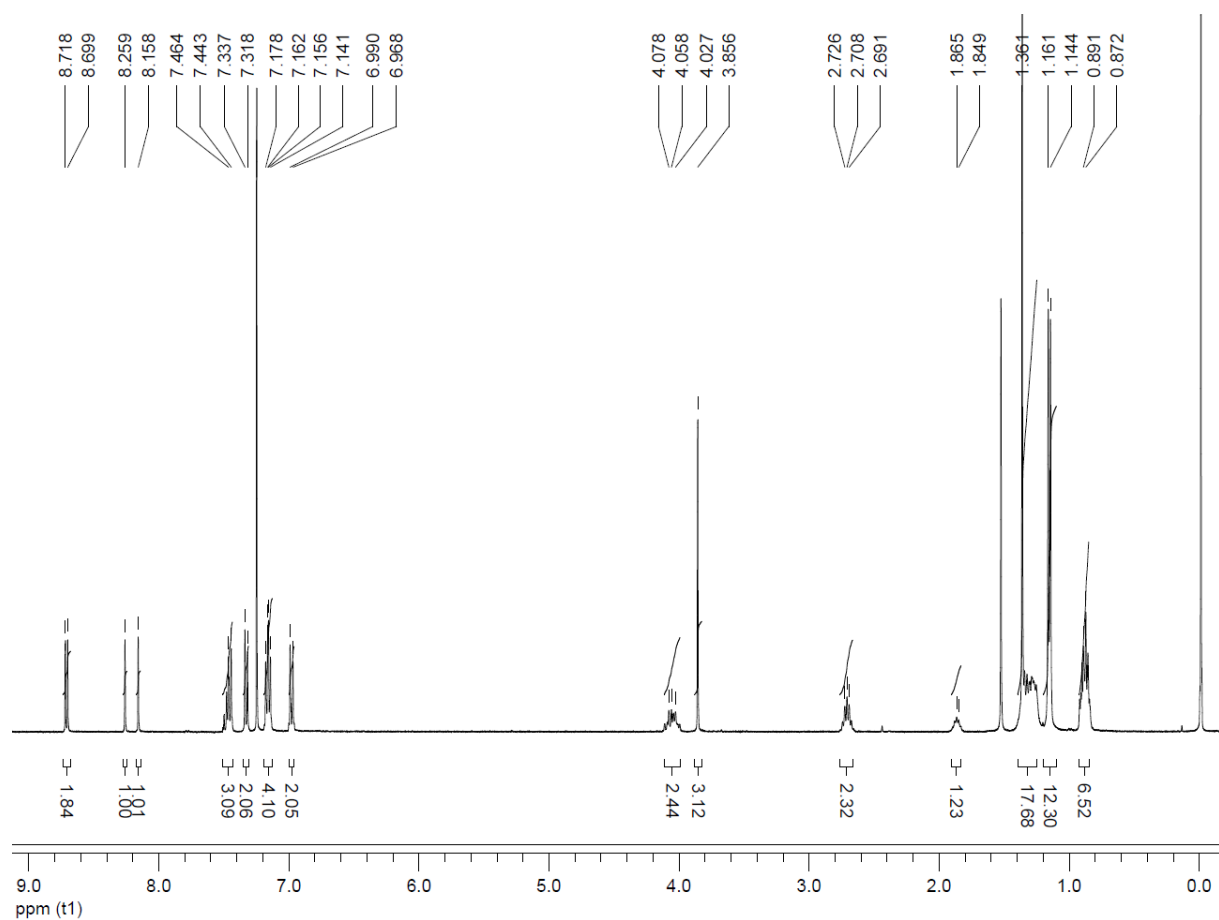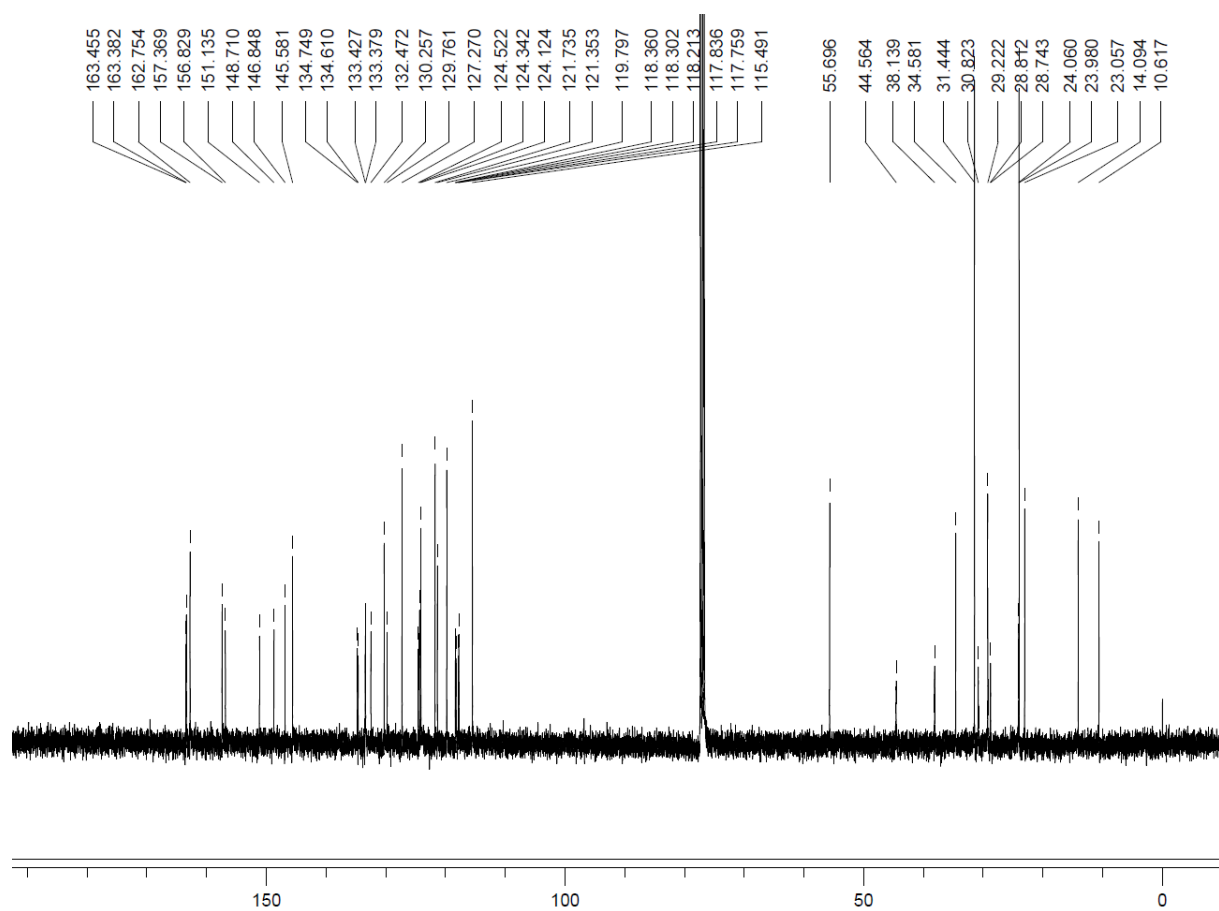

**Figure S-4.13:** <sup>1</sup>H and <sup>13</sup>C NMR spectra of compound 14.



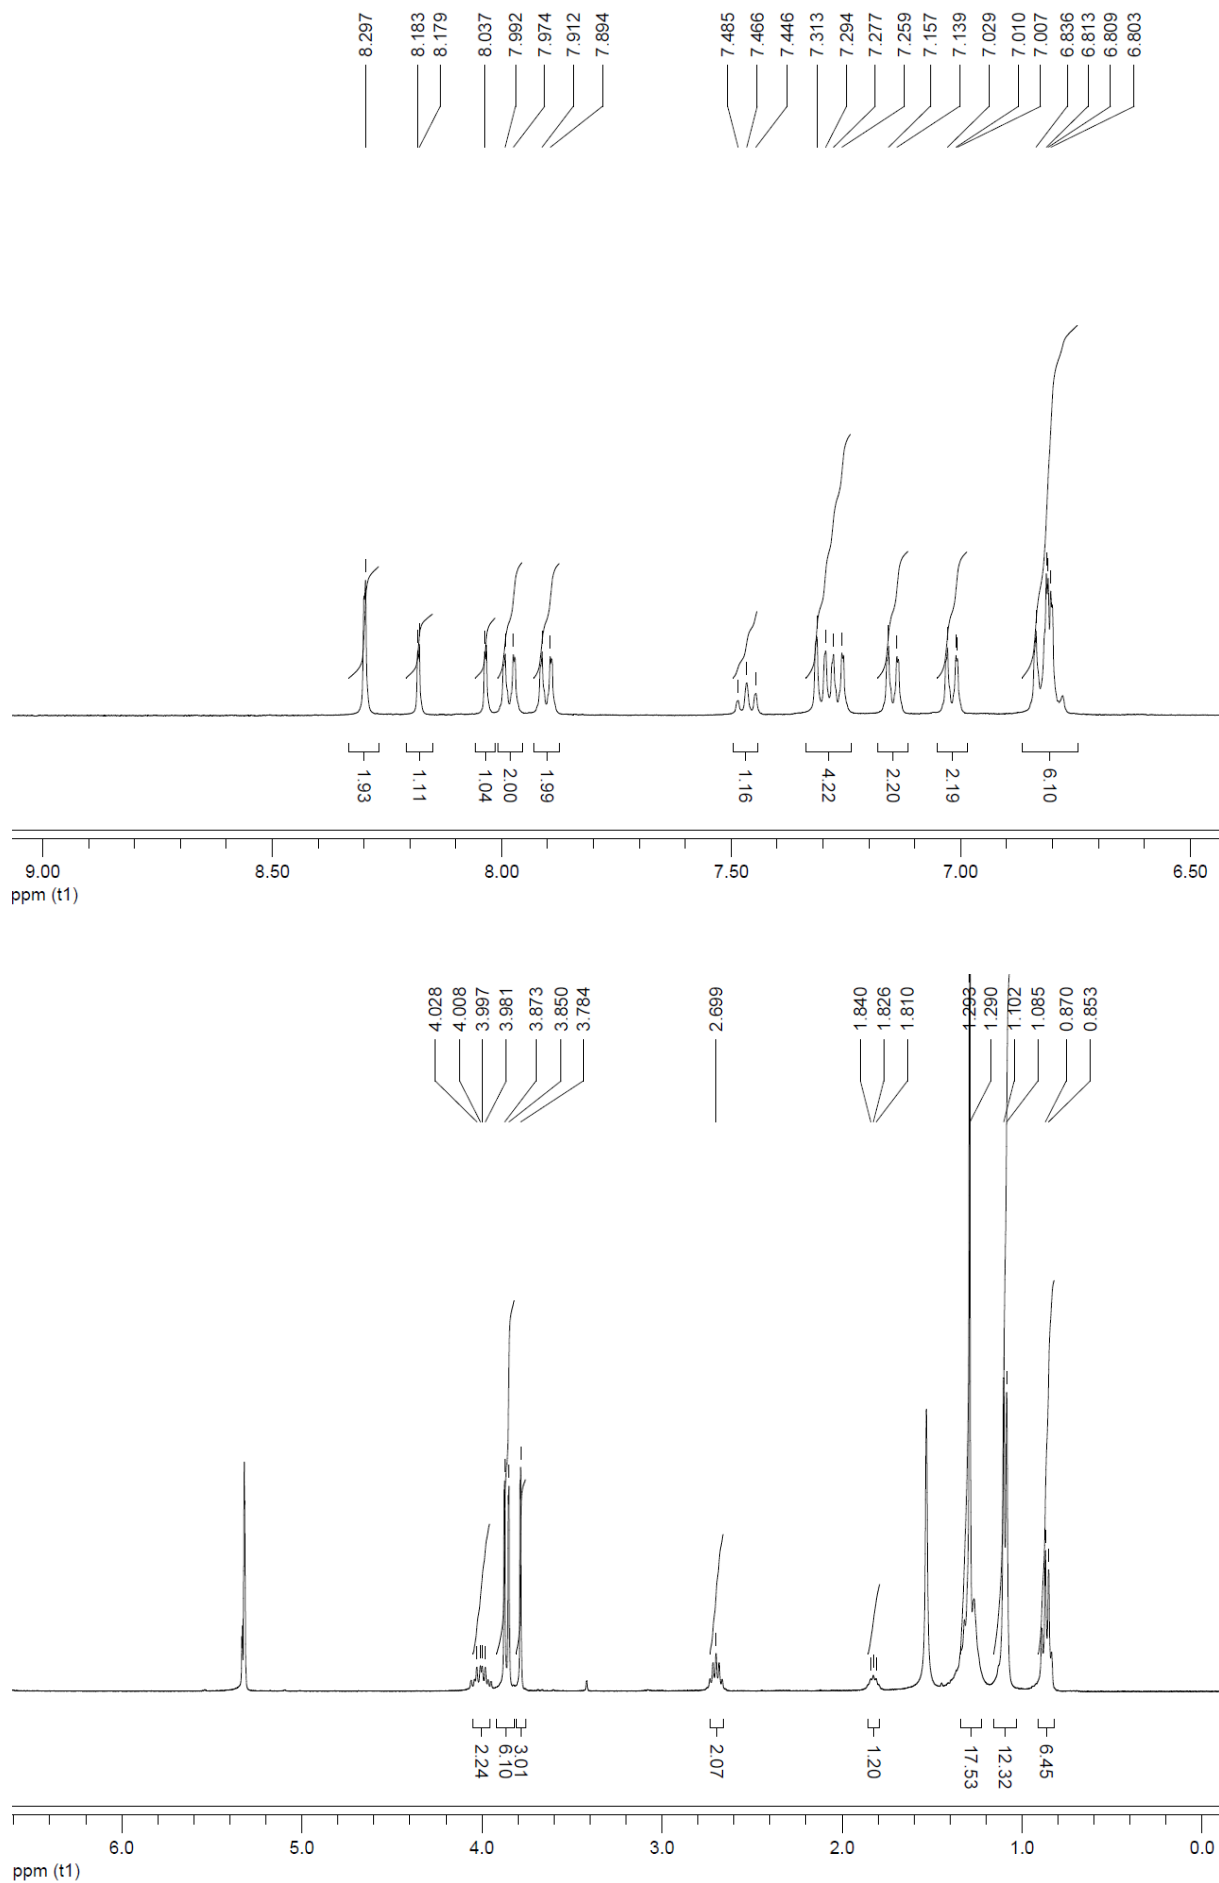

**Figure S-4.14:** <sup>1</sup>H NMR spectrum of compound **15** (aromatic part at the top and aliphatic part at the bottom).

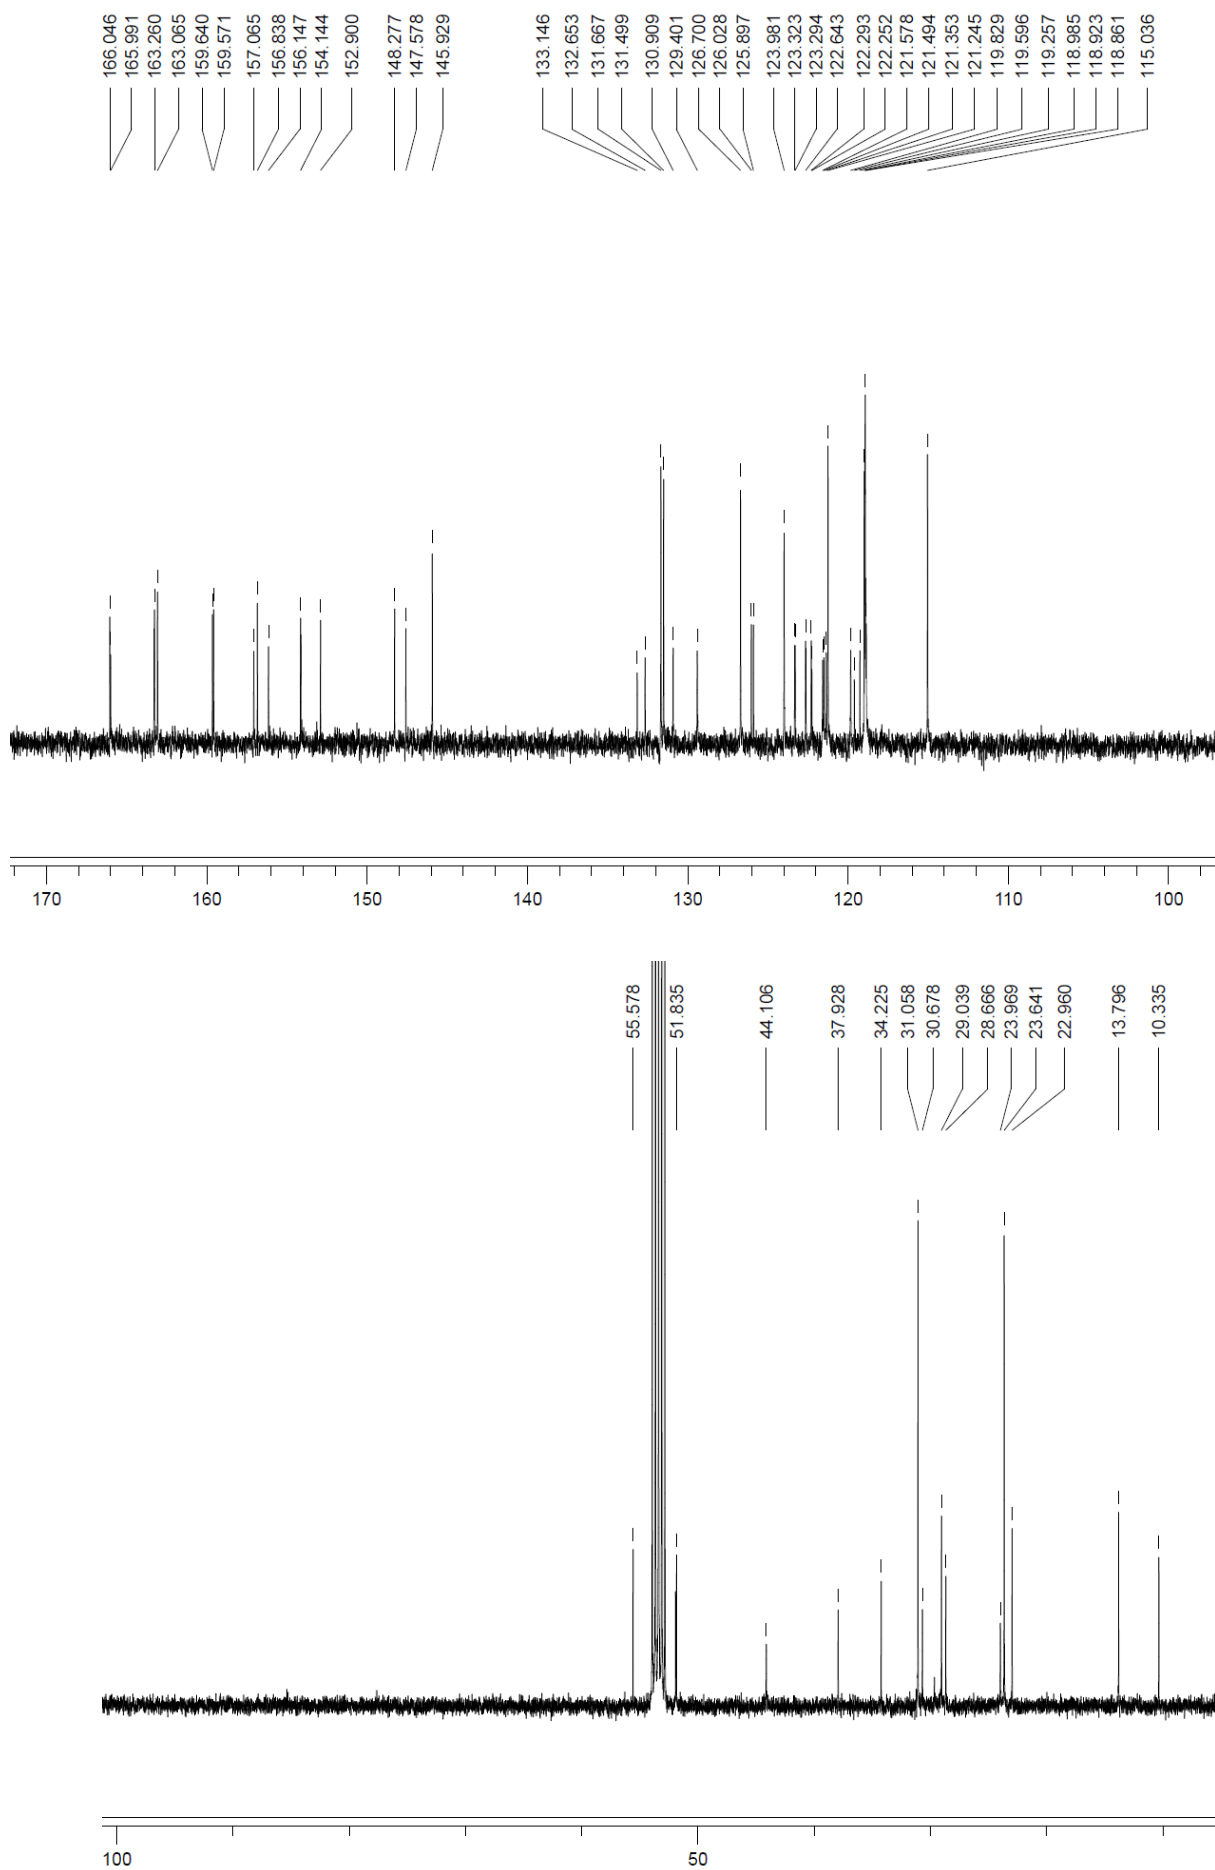

**Figure S-4.15:**  $^{13}\text{C}$  NMR spectrum of compound **15** (aromatic part at the top and aliphatic part at the bottom).

## Section 5. High-resolution mass spectra of newly synthesized compounds

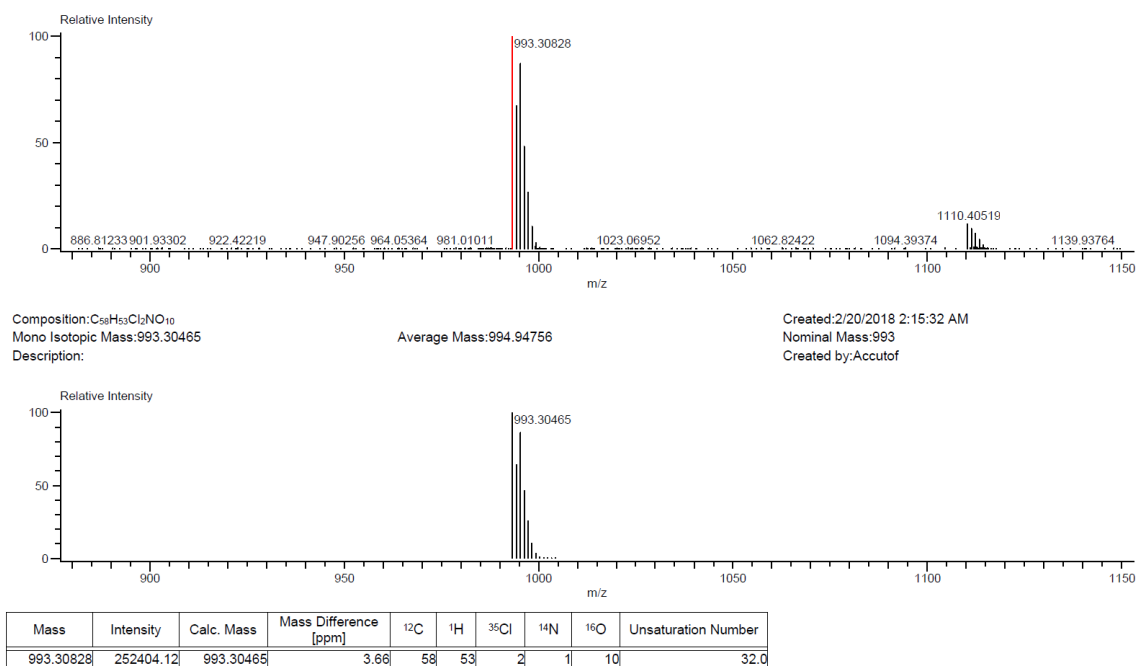

**Figure S-5.1:** HR mass spectrum of compound 2.

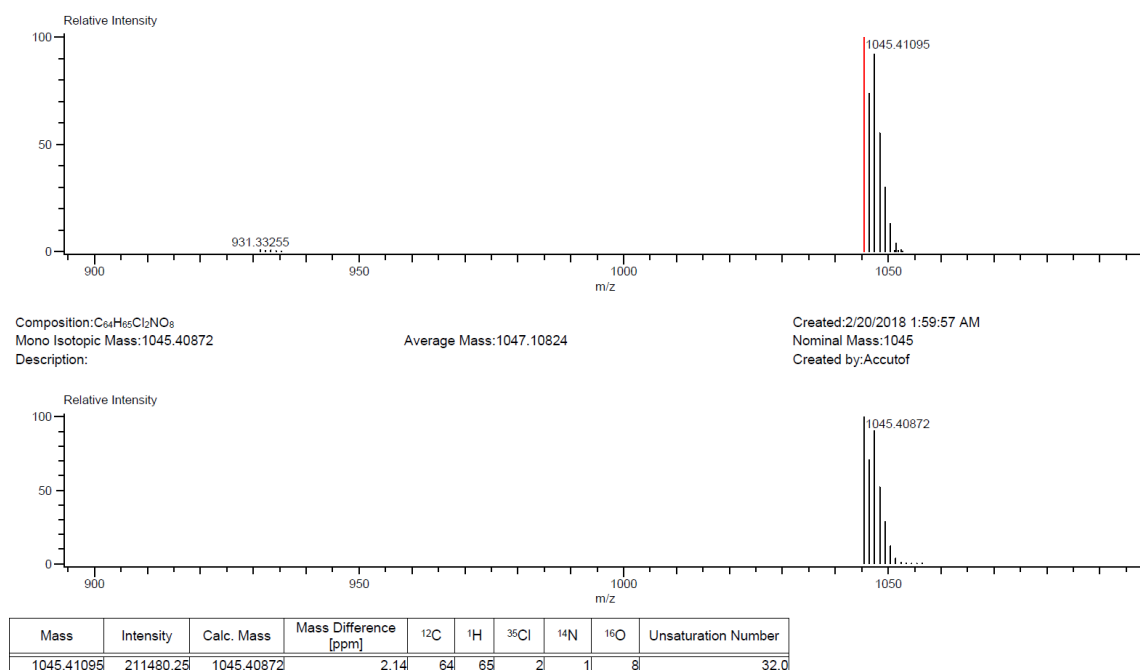

**Figure S-5.2:** HR mass spectrum of compound 3.

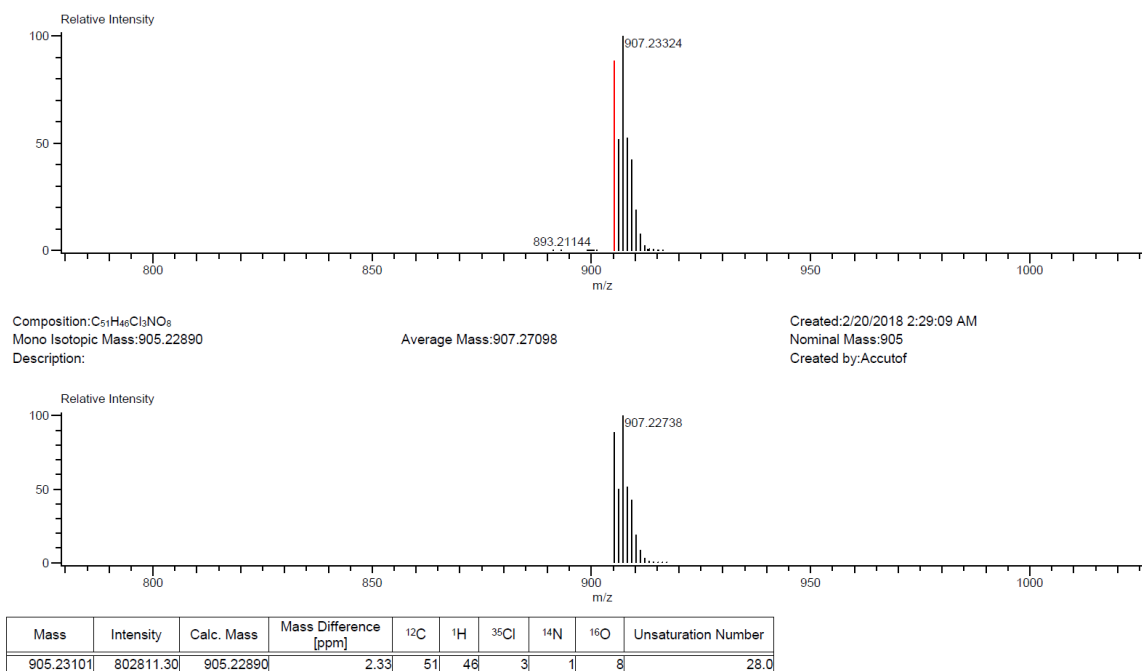

**Figure S-5.3: HR mass spectrum of compound 4.**

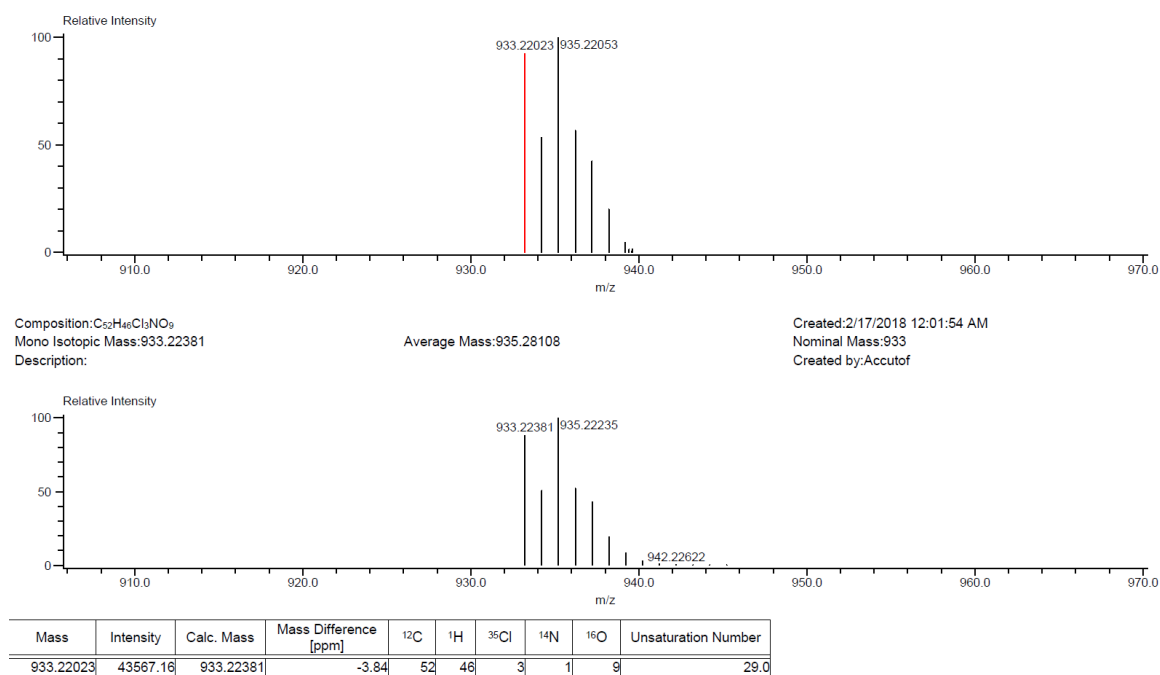

**Figure S-5.4: HR mass spectrum of compound 5.**

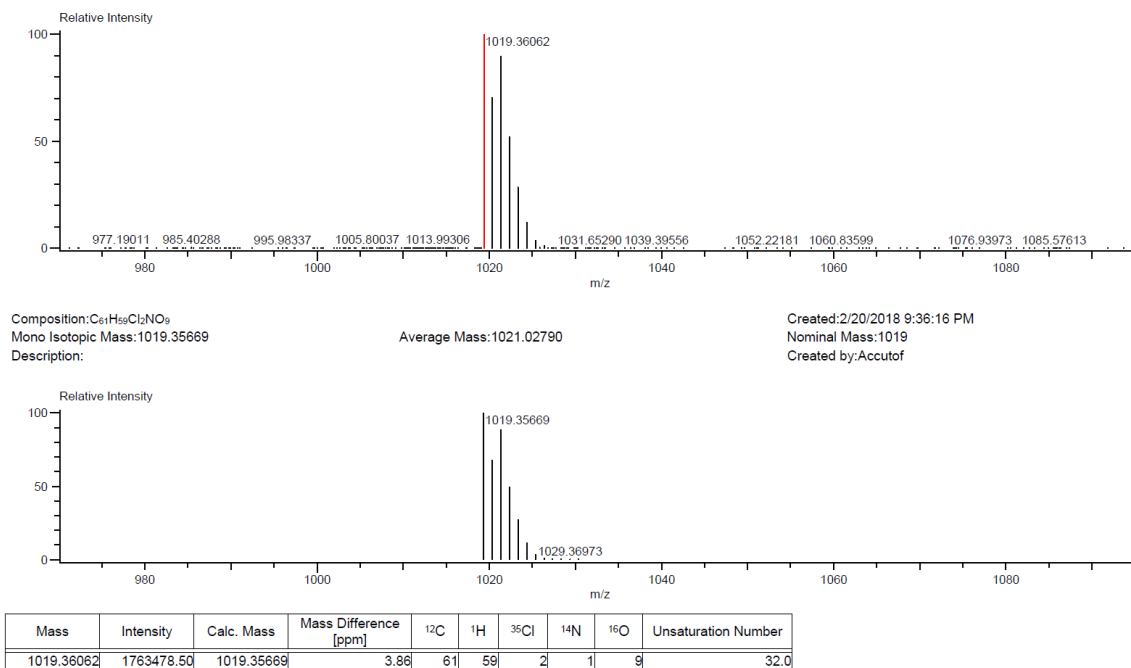

**Figure S-5.5:** HR mass spectrum of compound **6**.

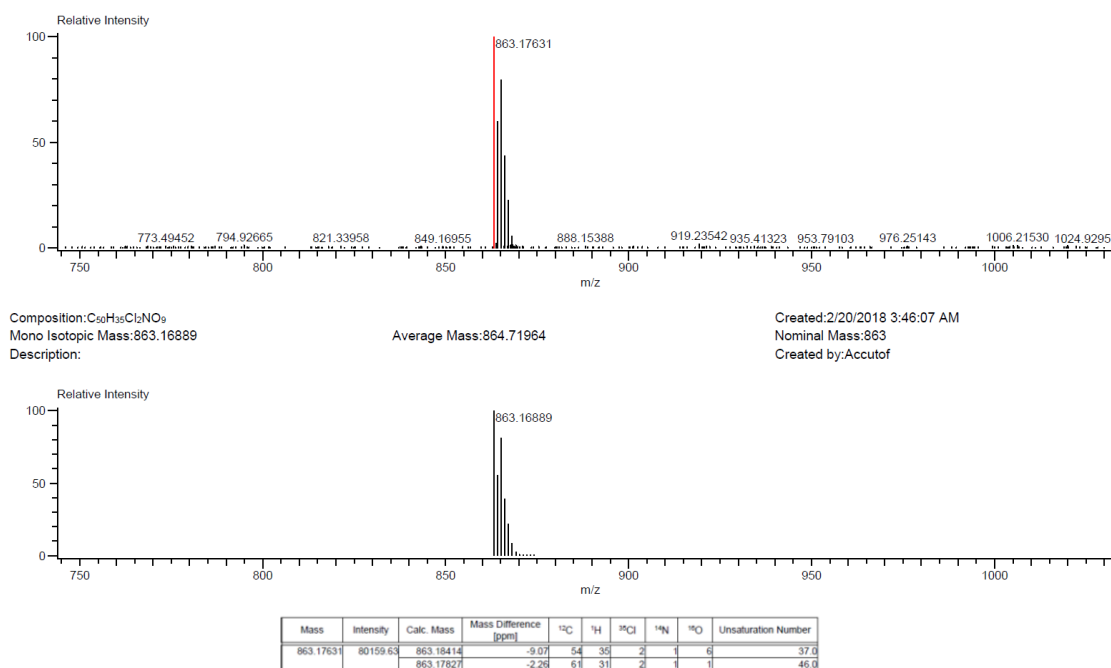

**Figure S-5.6:** HR mass spectrum of compound **7**.

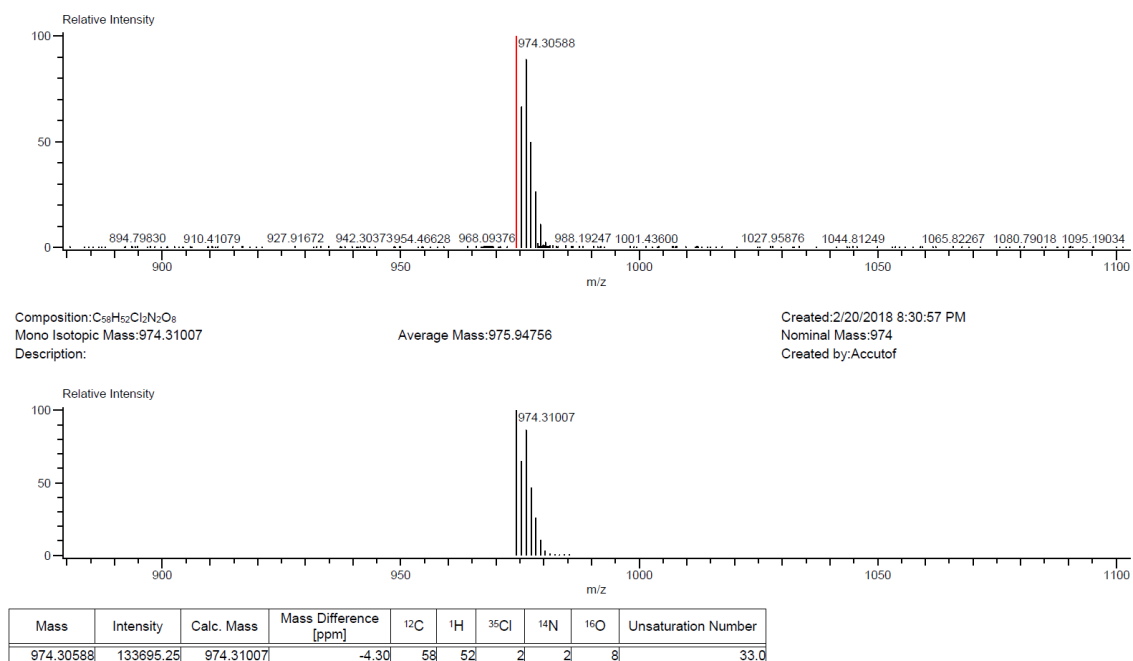

**Figure S-5.7:** HR mass spectrum of compound **8**.

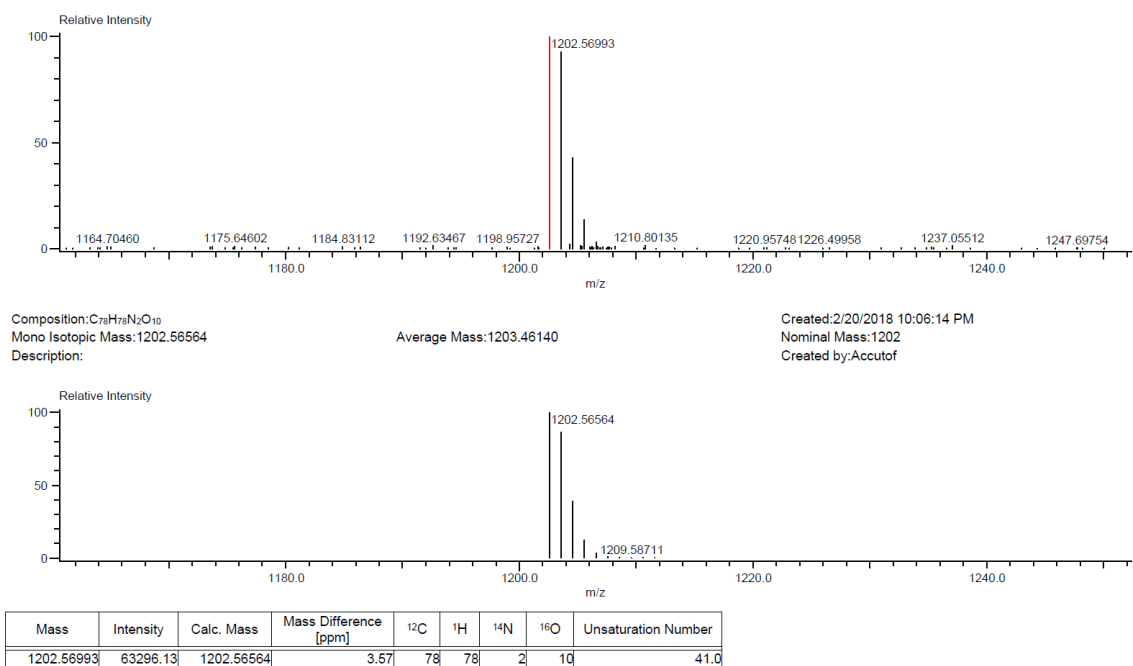

**Figure S-5.8:** HR mass spectrum of compound **9**.

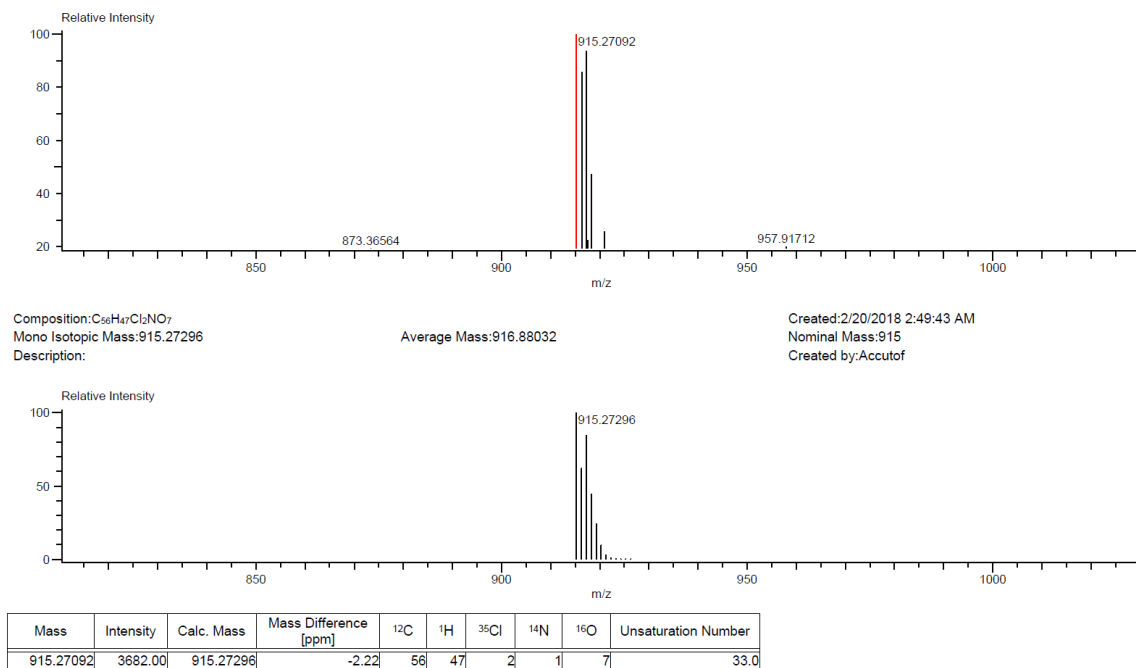

**Figure S-5.9:** HR mass spectrum of compound **10**.

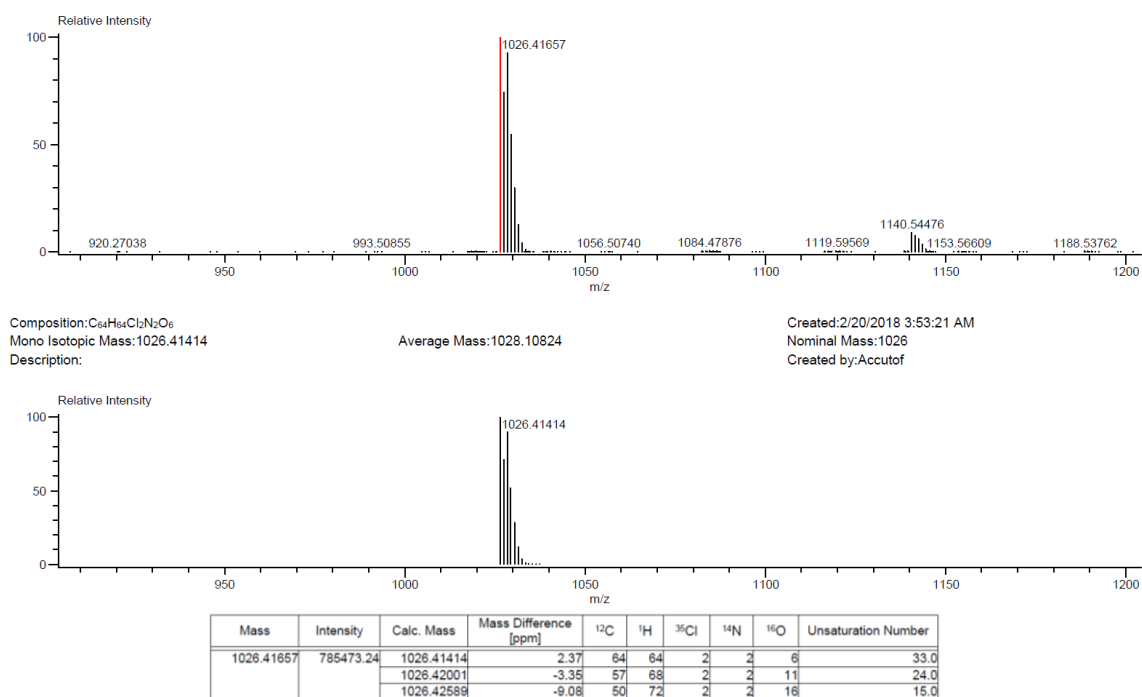

**Figure S-5.10:** HR mass spectrum of compound **11**.

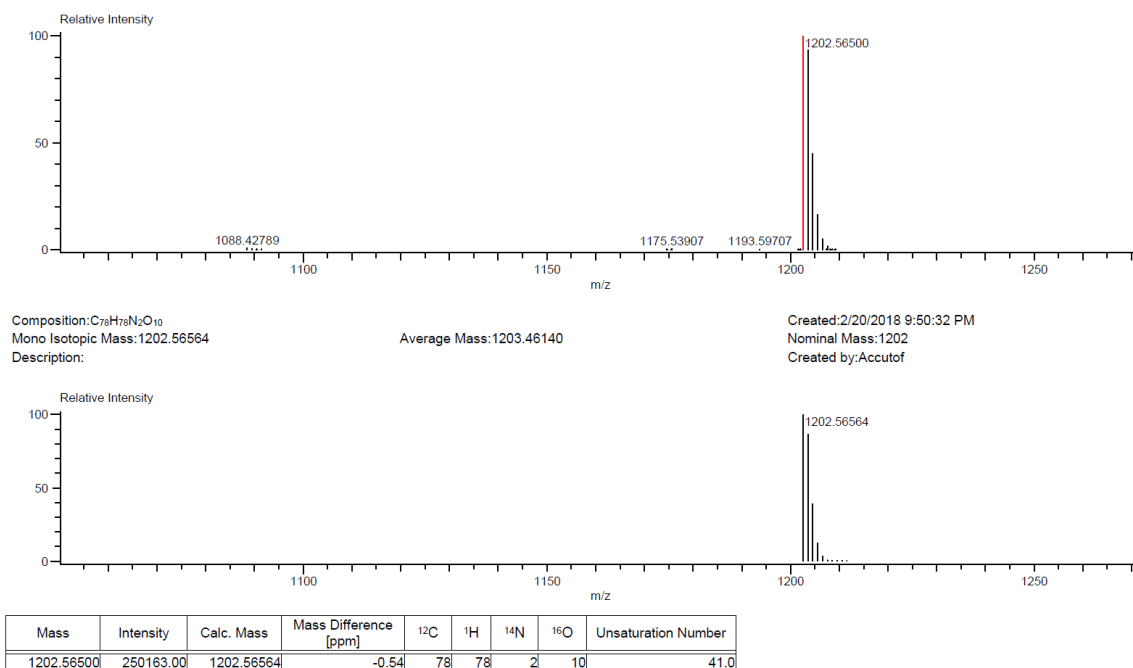

**Figure S-5.11: HR mass spectrum of compound 12.**

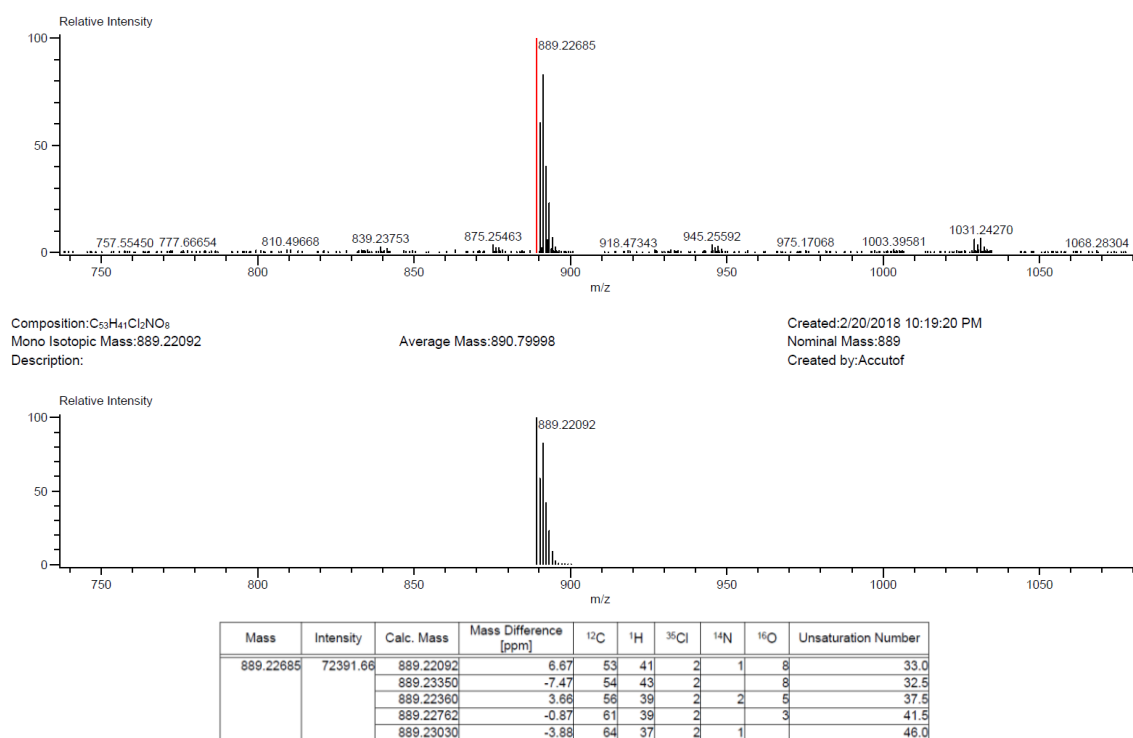

**Figure S-5.12: HR mass spectrum of compound 13.**



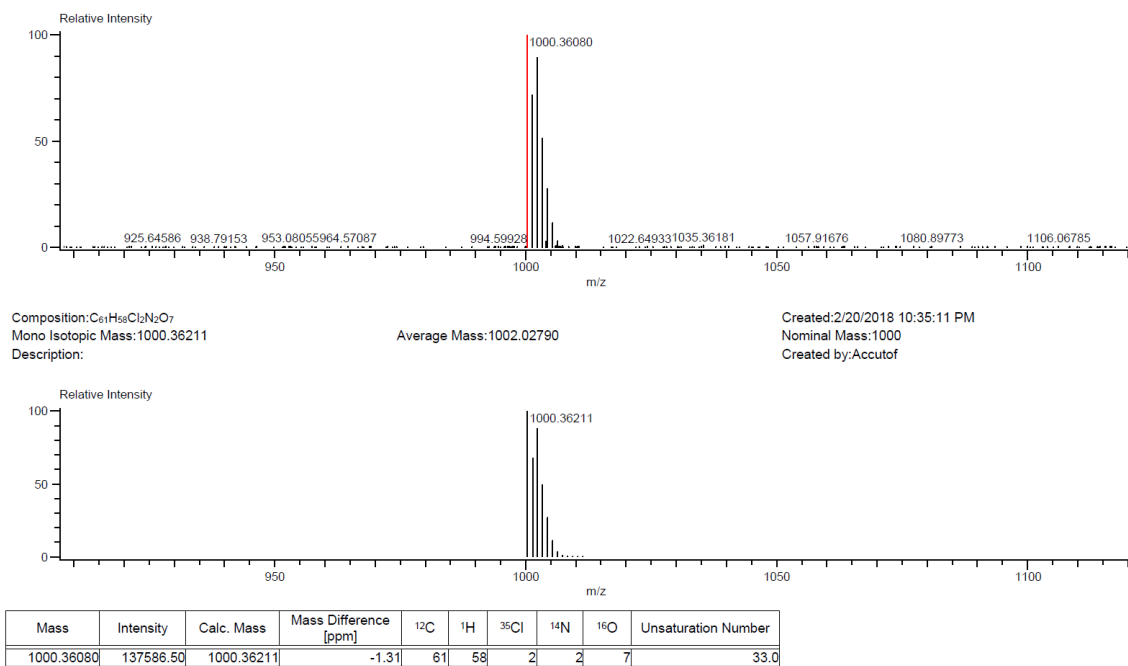

**Figure S-5.13: HR mass spectrum of compound 14.**

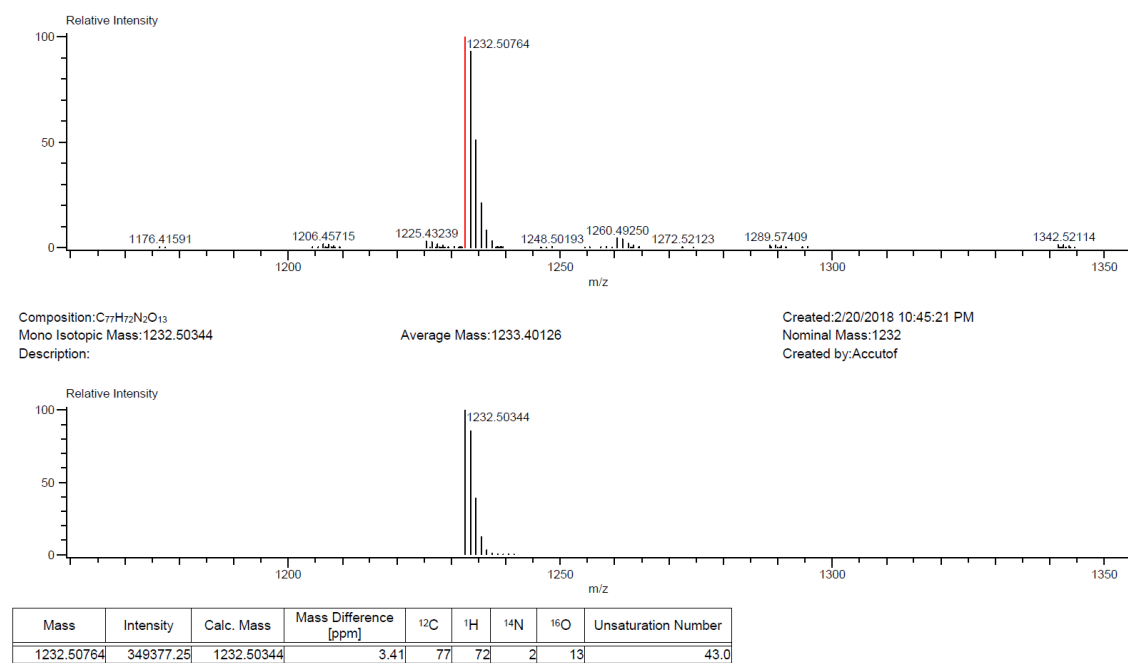

**Figure S-5.14: HR mass spectrum of compound 15.**
